# Supplementary material for: Trends and trend reversal detection in two decades of tropospheric NO 2 satellite observations
Source: Copernicus journal article supplement (doi:10.5194/acp-2018-988), 2018-11-02
Supplement: Supplementary file 1 [file acp-2018-988-supplement.pdf]

*Supplement of*

**Trends and trend reversal detection in two decades of tropospheric NO<sub>2</sub> satellite observations**

Aristeidis K. Georgoulias et al.

*Correspondence to:* Aristeidis K. Georgoulias (ageor@auth.gr)

### Spatial resolution correction factor (CF1)

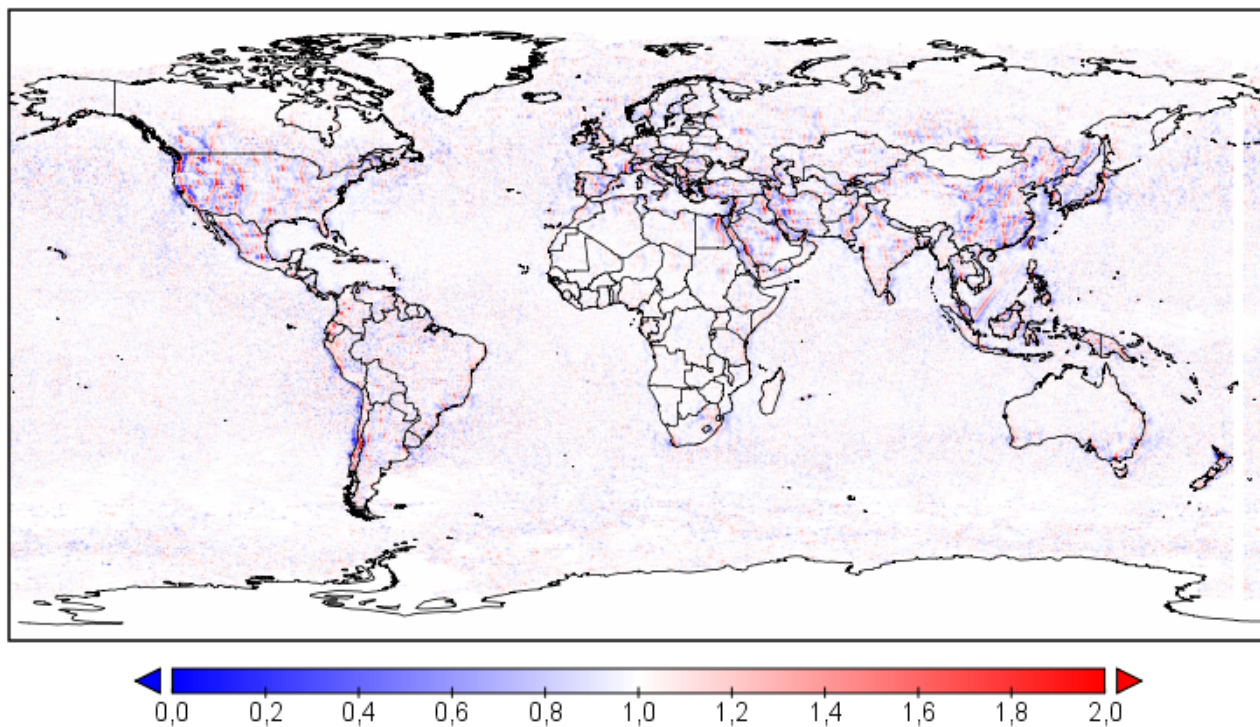

**Figure S1:** Map with the annual mean spatial resolution correction factors (CF1). A value of 1 was used in cases where the mean tropospheric NO<sub>2</sub> VCD was lower than SCIAMACHY's precision ( $0.1 \times 10^{15}$  molecules cm<sup>-2</sup>).

Spatial resolution correction factor (CF1)

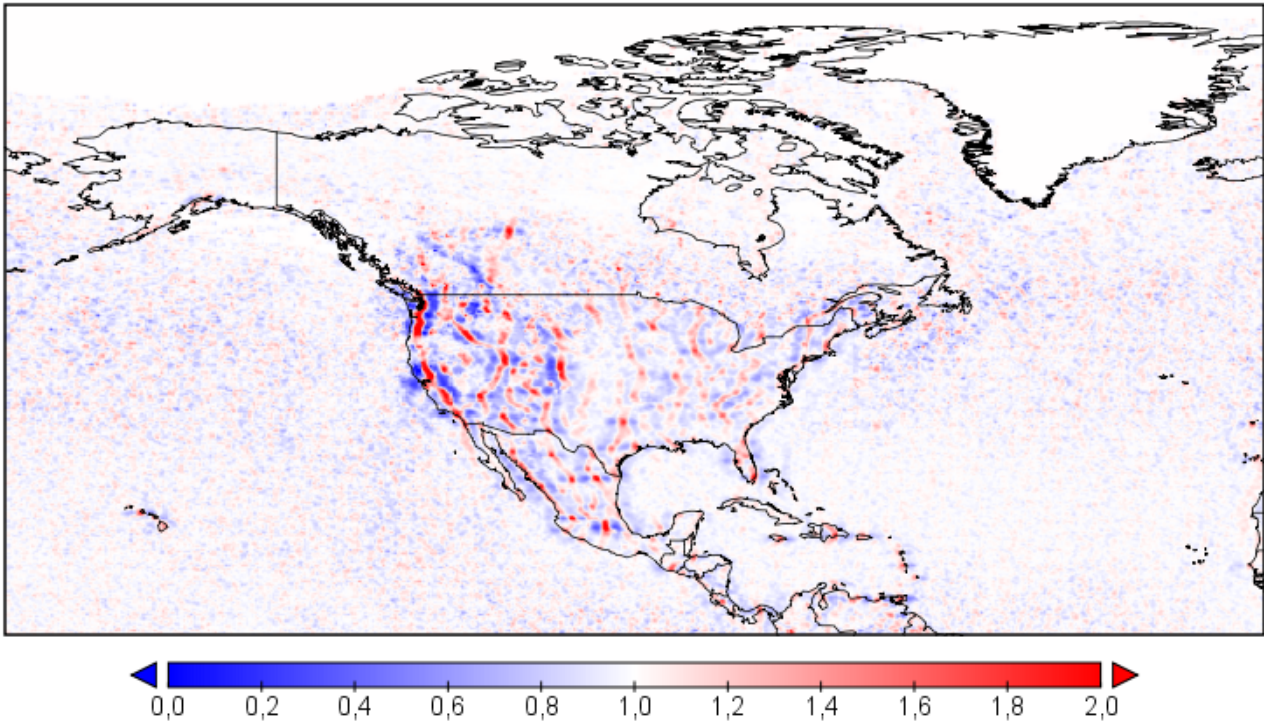

**Figure S2:** The same as Fig. S1 but for North America.

Spatial resolution correction factor (CF1)

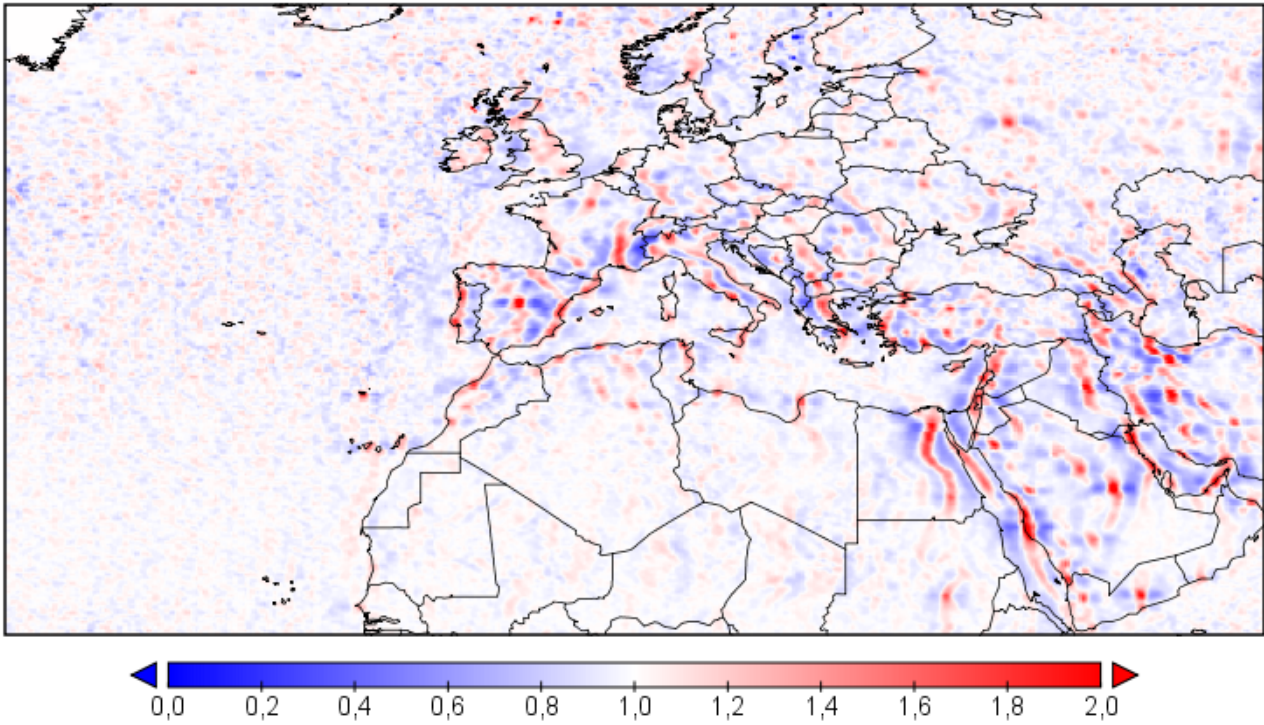

**Figure S3:** The same as Fig. S1 but for Europe.



Spatial resolution correction factor (CF1)

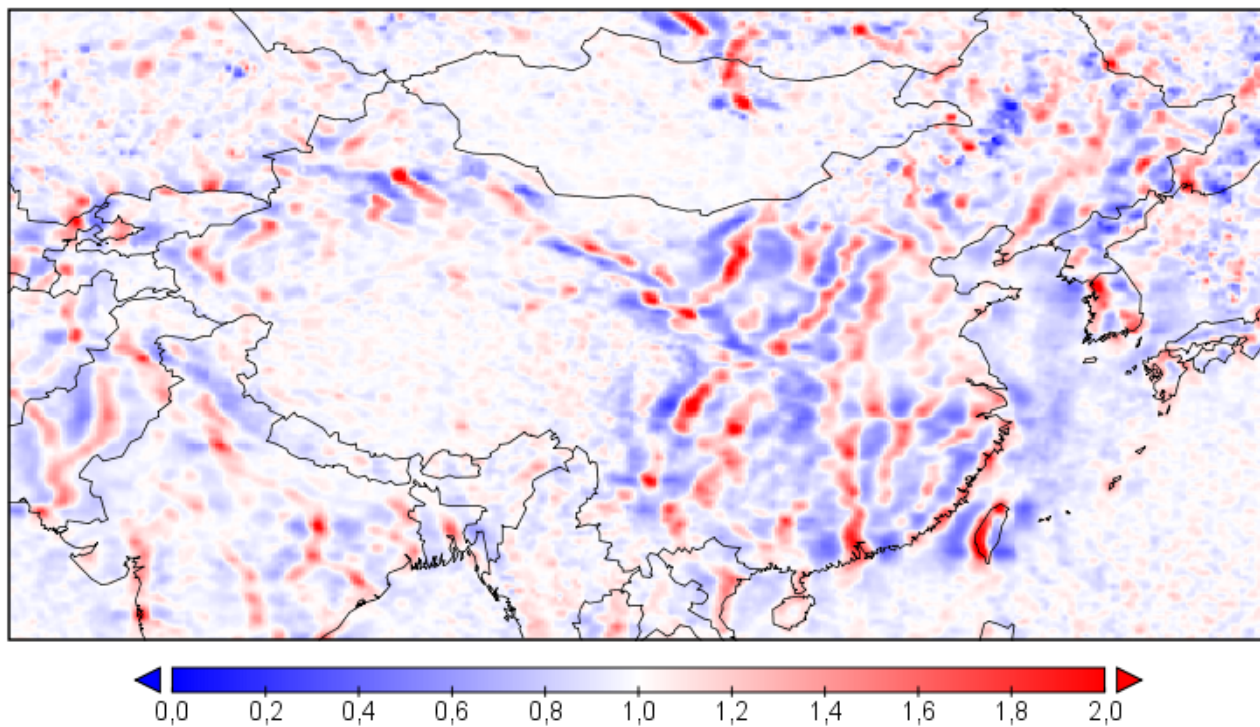

**Figure S4:** The same as Fig. S1 but for China.

Shift correction factor (CF2)

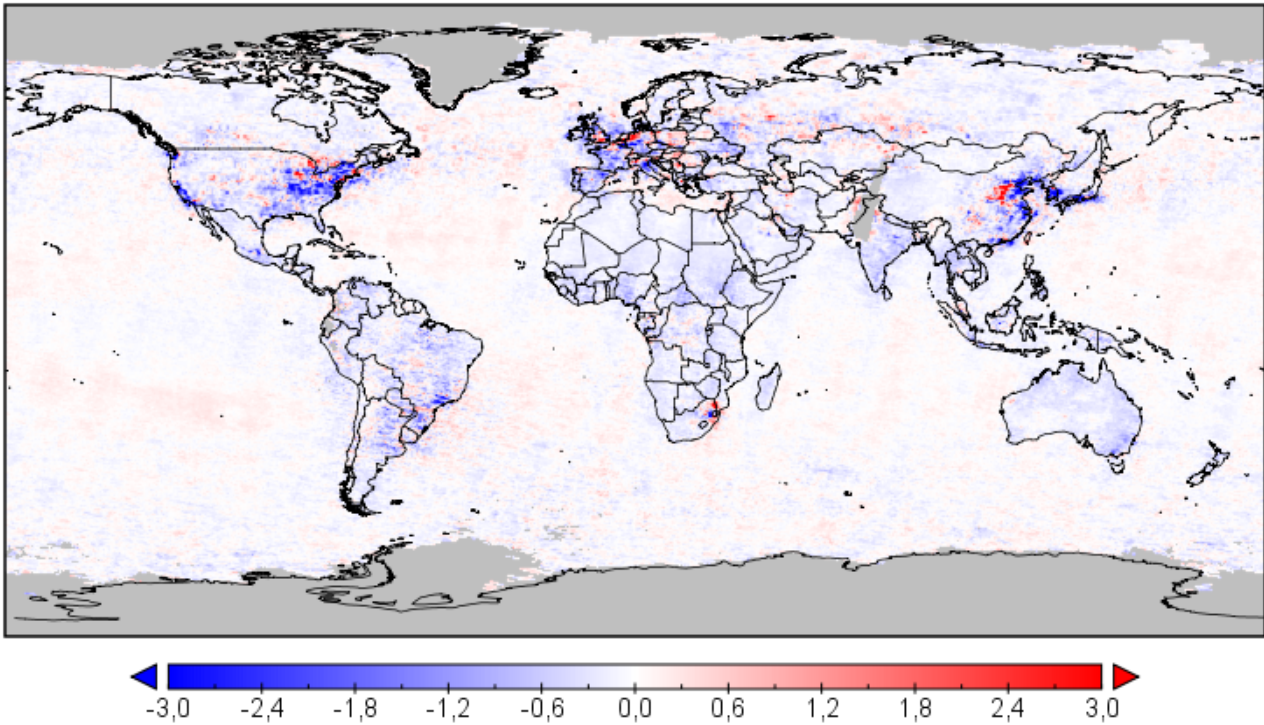

**Figure S5:** Map with the shift correction factors (CF2). Grey color is used for regions where the application of the shift correction was not possible due to lack of measurements during the common GOME-SCIAMACHY period.

Shift correction factor (CF2)

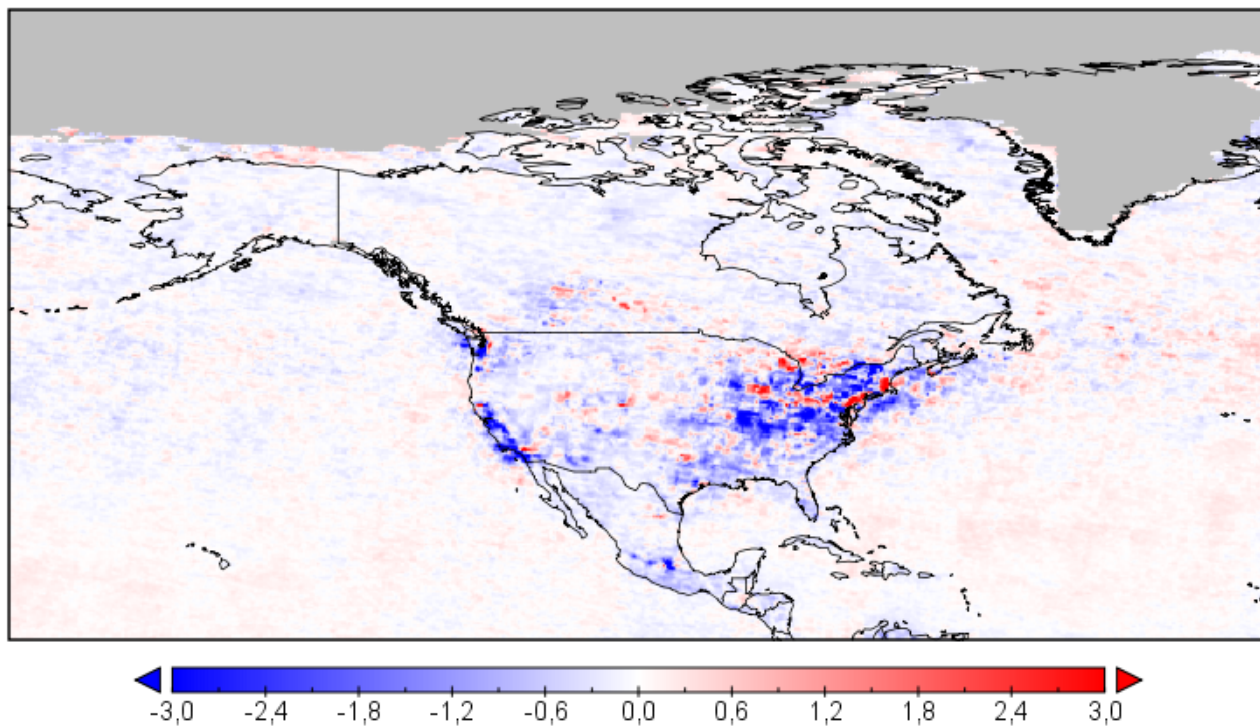

**Figure S6:** The same as Fig. S5 but for North America.

Shift correction factor (CF2)

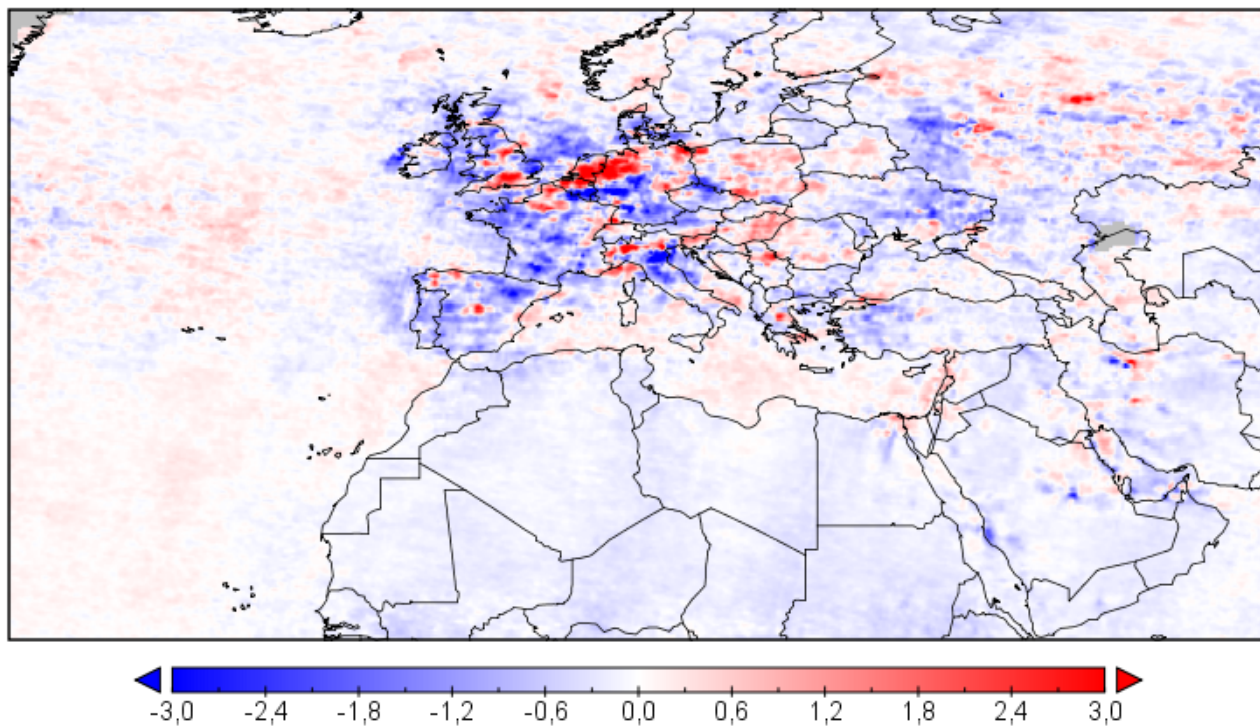

**Figure S7:** The same as Fig. S5 but for Europe.



Shift correction factor (CF2)

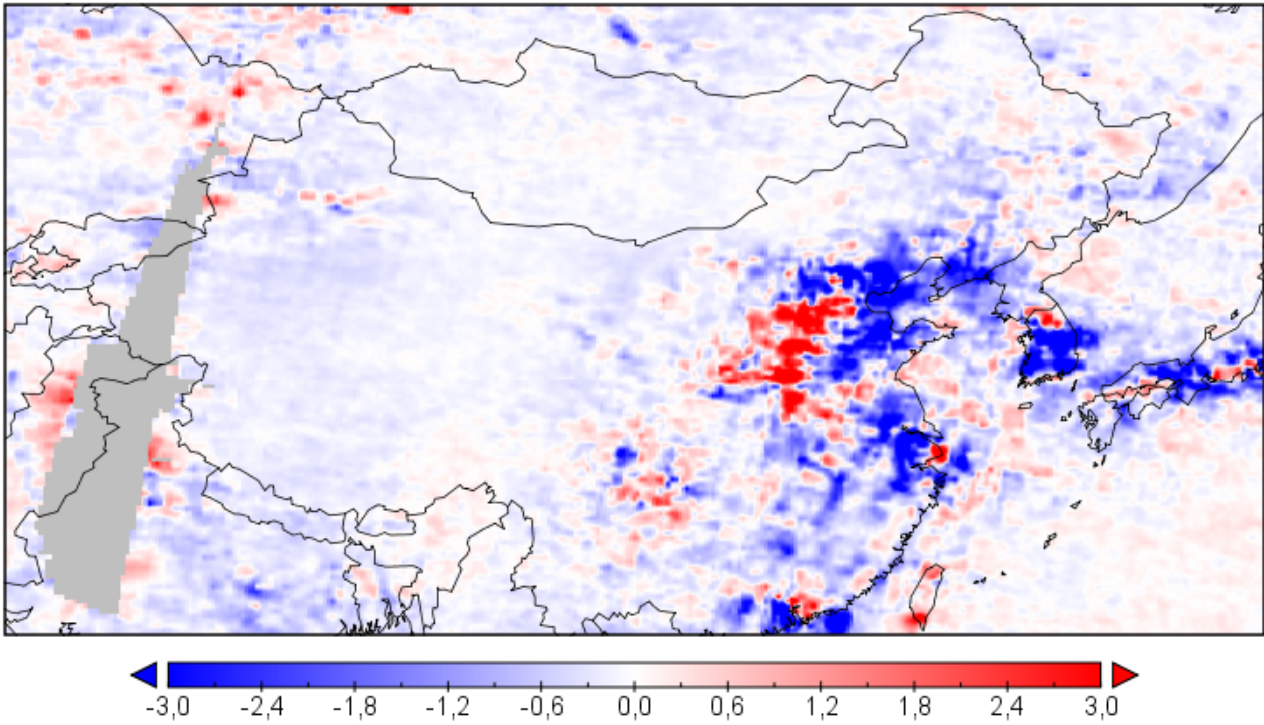

**Figure S8:** The same as Fig. S5 but for China.

Seasonal amplitude correction factor (CF3)

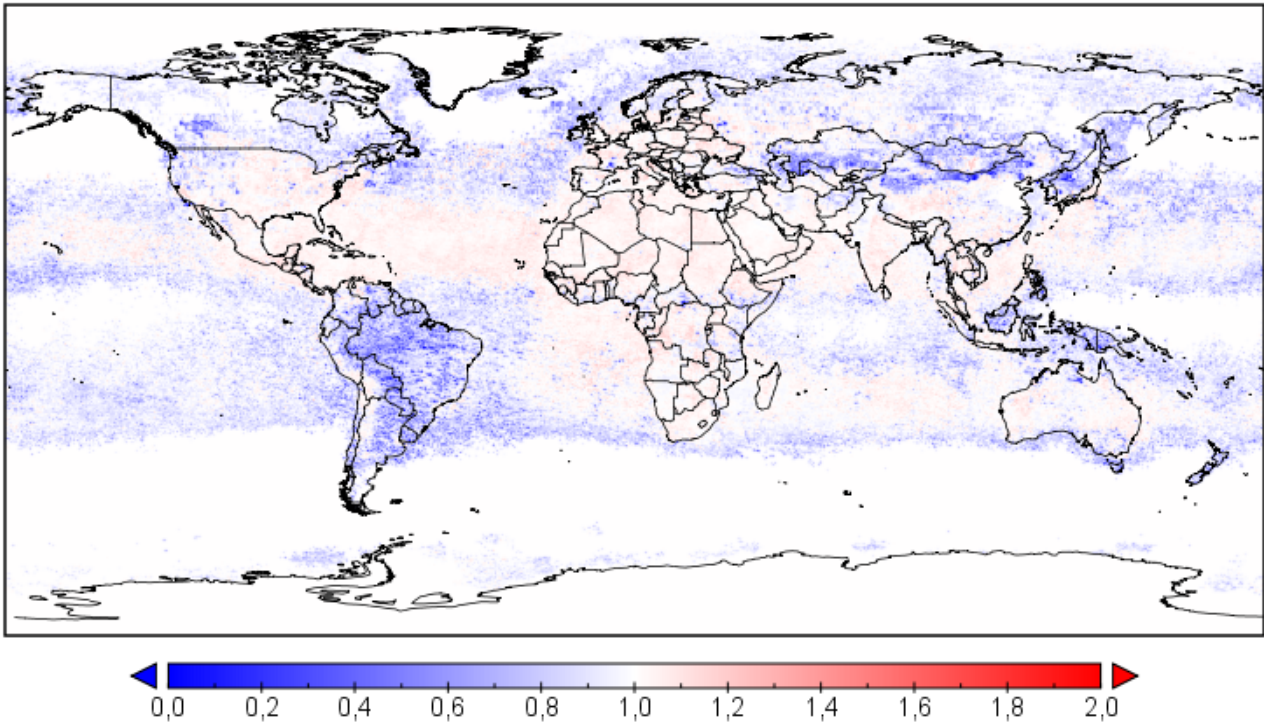

**Figure S9:** Map with the annual mean seasonal amplitude correction factors (CF3).

Seasonal amplitude correction factor (CF3)

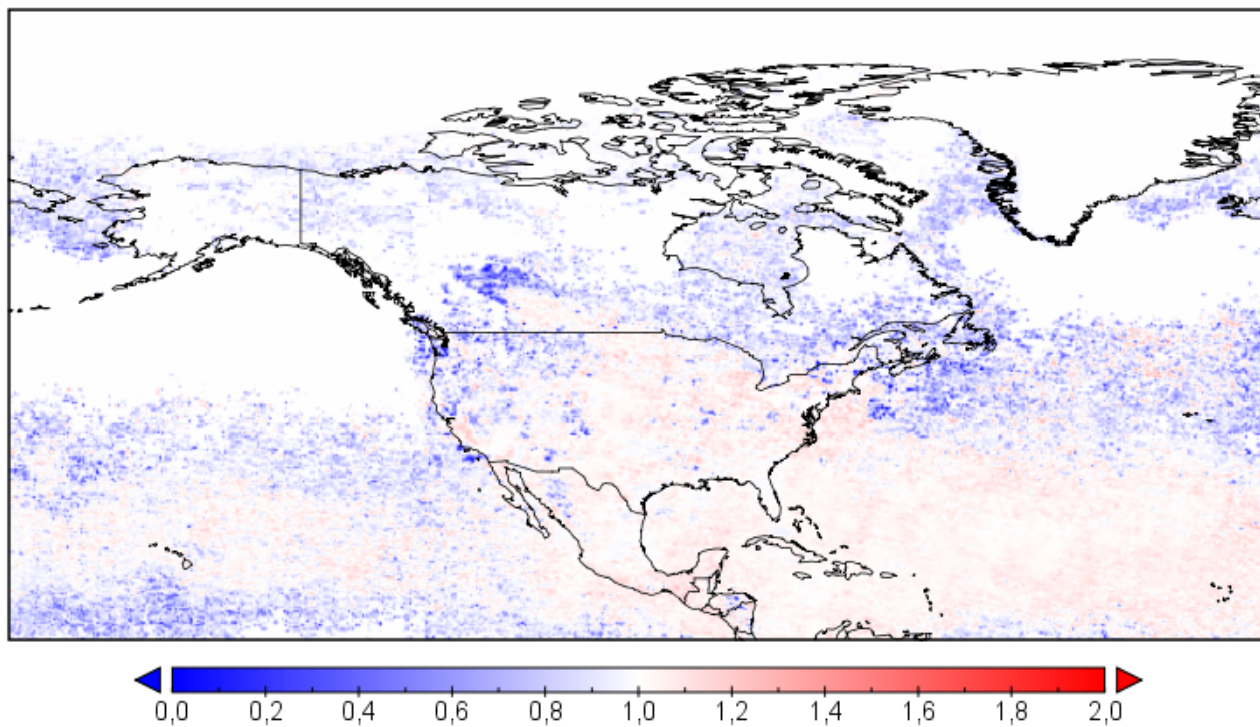

**Figure S10:** The same as Fig. S9 but for North America.

Seasonal amplitude correction factor (CF3)

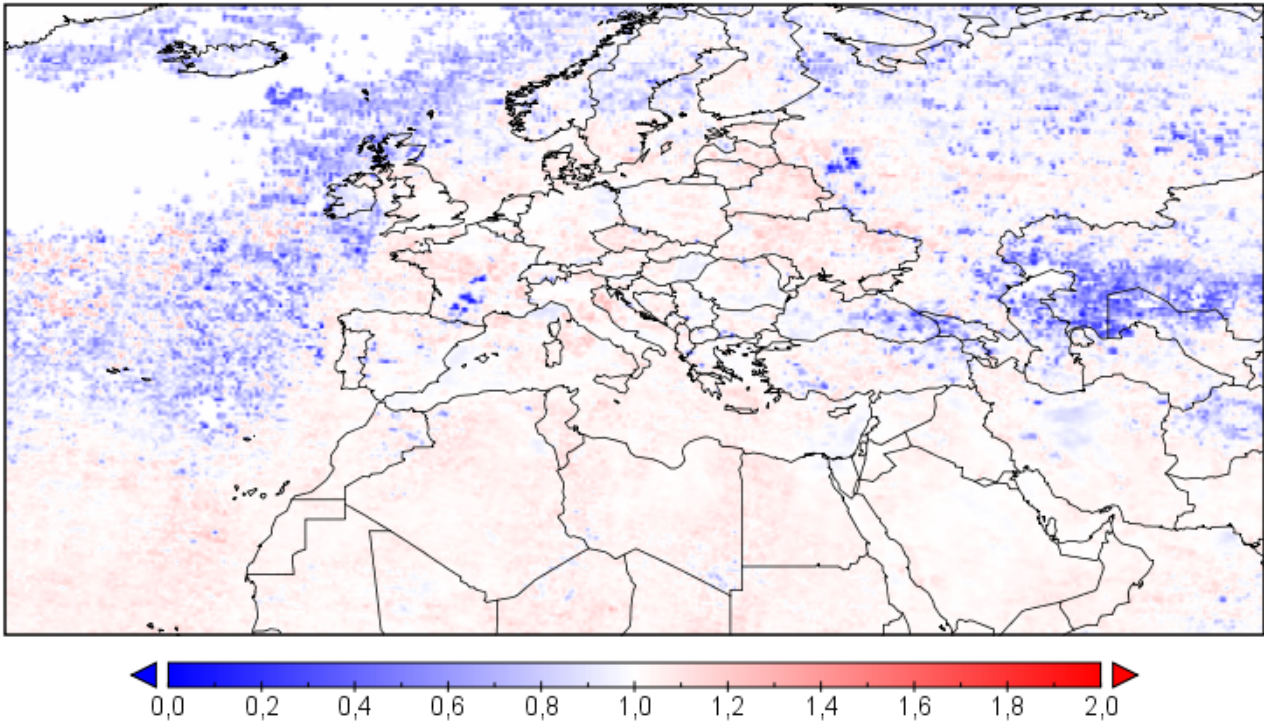

**Figure S11:** The same as Fig. S9 but for Europe.



Seasonal amplitude correction factor (CF3)

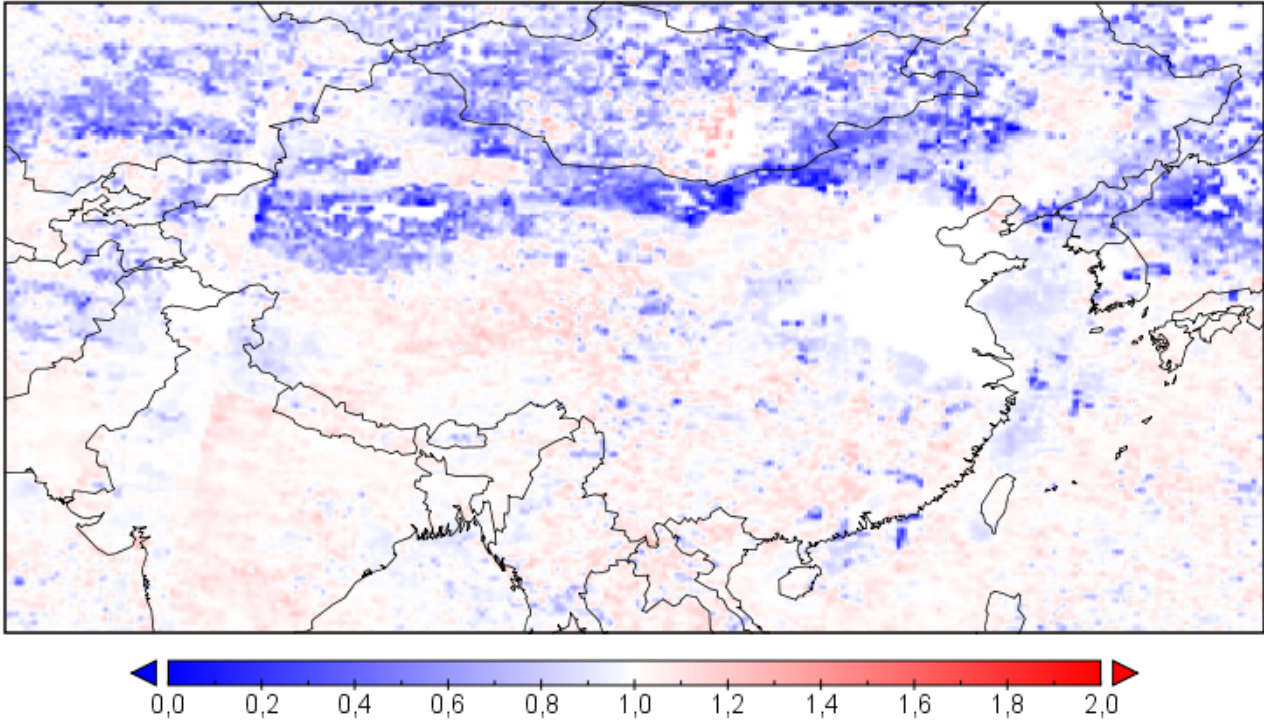

**Figure S12:** The same as Fig. S9 but for China.

**Table S1:** Absolute trends (in  $10^{15}$  molecules  $\text{cm}^{-2} \text{yr}^{-1}$ ) and trends relative to the fitted mean of the first year (in  $\% \text{yr}^{-1}$ ) with the corresponding uncertainties ( $\pm 1\sigma$ ) for the period 4/1996-9/2017 for all the world countries. The year when a trend reversal was detected and the absolute and relative trend for the sub-period before and the sub-period after the detected trend reversal are also given. The year of reversal is included in both sub-periods while the relative trends are calculated relative to the fitted mean of each sub-period's first year. Bold characters are used to indicate the year of reversal and the statistically significant trends at the 95% confidence level.

| Country                  | Whole period          |                       | Reversal    | Before the reversal   |                       | After the reversal    |                        |
|--------------------------|-----------------------|-----------------------|-------------|-----------------------|-----------------------|-----------------------|------------------------|
|                          | Abs. trend            | Rel. trend            |             | Abs. trend            | Rel. trend            | Abs. trend            | Rel. trend             |
| Afghanistan              | 0.0029±0.0018         | 0.6114±0.3768         | <b>2011</b> | <b>0.0102±0.0024</b>  | <b>2.3918±0.5525</b>  | <b>-0.0338±0.0089</b> | <b>-5.3566±1.4061</b>  |
| Albania                  | <b>0.0209±0.0055</b>  | <b>2.7604±0.7302</b>  | <b>2012</b> | <b>0.0448±0.0073</b>  | <b>7.3462±1.2018</b>  | <b>-0.0672±0.0267</b> | <b>-5.4265±2.1563</b>  |
| Algeria                  | 0.0017±0.0015         | 0.3706±0.3100         | <b>2012</b> | <b>0.0045±0.0022</b>  | <b>1.0024±0.4884</b>  | <b>-0.0233±0.0066</b> | <b>-4.0611±1.1504</b>  |
| American Samoa           | <b>-0.0152±0.0016</b> | <b>-4.7622±0.4991</b> | -           | -                     | -                     | -                     | -                      |
| Andorra                  | 0.0038±0.0051         | 0.6671±0.8951         | -           | -                     | -                     | -                     | -                      |
| Angola                   | <b>-0.0049±0.0019</b> | <b>-0.4141±0.1591</b> | <b>2002</b> | <b>-0.0290±0.0127</b> | <b>-2.2477±0.9822</b> | 0.0020±0.0023         | 0.1877±0.2147          |
| Anguilla                 | <b>-0.0091±0.0019</b> | <b>-1.8623±0.3972</b> | -           | -                     | -                     | -                     | -                      |
| Antigua and Barbuda      | <b>-0.0108±0.0018</b> | <b>-1.7836±0.3033</b> | -           | -                     | -                     | -                     | -                      |
| Argentina                | <b>0.0104±0.0032</b>  | <b>1.7992±0.5478</b>  | <b>2000</b> | <b>-0.0775±0.0159</b> | <b>-8.7719±1.8040</b> | <b>0.0234±0.0027</b>  | <b>5.0152±0.5857</b>   |
| Armenia                  | <b>0.0250±0.0035</b>  | <b>4.3776±0.6215</b>  | <b>2002</b> | <b>-0.0290±0.0117</b> | <b>-3.8537±1.5580</b> | <b>0.0304±0.0061</b>  | <b>4.5818±0.9141</b>   |
| Aruba                    | <b>-0.0099±0.0035</b> | <b>-1.0939±0.3844</b> | -           | -                     | -                     | -                     | -                      |
| Australia                | -0.0018±0.0021        | -0.2923±0.3375        | <b>2012</b> | 0.0036±0.0027         | 0.6205±0.4608         | <b>-0.0477±0.0148</b> | <b>-6.7697±2.1079</b>  |
| Austria                  | -0.0149±0.0091        | -0.5384±0.3285        | -           | -                     | -                     | -                     | -                      |
| Azerbaijan               | <b>0.0185±0.0032</b>  | <b>1.7365±0.2989</b>  | -           | -                     | -                     | -                     | -                      |
| Bahamas                  | -0.0029±0.0024        | -0.3481±0.2930        | -           | -                     | -                     | -                     | -                      |
| Bahrain                  | <b>0.1048±0.0160</b>  | <b>1.6557±0.2534</b>  | -           | -                     | -                     | -                     | -                      |
| Bangladesh               | <b>0.0484±0.0043</b>  | <b>3.0877±0.2710</b>  | -           | -                     | -                     | -                     | -                      |
| Barbados                 | <b>-0.0044±0.0019</b> | <b>-0.8481±0.3751</b> | -           | -                     | -                     | -                     | -                      |
| Belarus                  | -0.0017±0.0060        | -0.0957±0.3411        | -           | -                     | -                     | -                     | -                      |
| Belgium                  | <b>-0.2494±0.0260</b> | <b>-1.9862±0.2070</b> | -           | -                     | -                     | -                     | -                      |
| Belize                   | -0.0038±0.0029        | -0.5684±0.4333        | -           | -                     | -                     | -                     | -                      |
| Benin                    | -0.0003±0.0040        | -0.0272±0.3184        | -           | -                     | -                     | -                     | -                      |
| Bermuda                  | <b>-0.0228±0.0034</b> | <b>-2.4517±0.3647</b> | <b>2002</b> | 0.0066±0.0213         | 0.7575±2.4317         | <b>-0.0200±0.0052</b> | <b>-2.5897±0.6755</b>  |
| Bhutan                   | <b>-0.0120±0.0022</b> | <b>-1.3679±0.2494</b> | -           | -                     | -                     | -                     | -                      |
| Bolivia                  | 0.0009±0.0039         | 0.1330±0.5810         | -           | -                     | -                     | -                     | -                      |
| Bosnia-Herzegovina       | 0.0042±0.0059         | 0.2819±0.3969         | -           | -                     | -                     | -                     | -                      |
| Botswana                 | <b>-0.0142±0.0037</b> | <b>-0.9717±0.2534</b> | -           | -                     | -                     | -                     | -                      |
| Brazil                   | <b>0.0094±0.0024</b>  | <b>1.4344±0.3684</b>  | <b>2000</b> | -0.0164±0.0219        | -2.1790±2.9159        | <b>0.0147±0.0031</b>  | <b>2.3642±0.4951</b>   |
| British Virgin Islands   | <b>-0.0149±0.002</b>  | <b>-2.3040±0.3108</b> | -           | -                     | -                     | -                     | -                      |
| Brunei Darussalam        | 0.0046±0.0050         | 0.7567±0.8115         | -           | -                     | -                     | -                     | -                      |
| Bulgaria                 | <b>0.0220±0.0058</b>  | <b>1.3198±0.3489</b>  | <b>2007</b> | <b>0.0576±0.0142</b>  | <b>3.8716±0.9559</b>  | <b>-0.0211±0.0139</b> | <b>-0.9824±0.6472</b>  |
| Burkina Faso             | -0.0032±0.0028        | -0.3087±0.2729        | -           | -                     | -                     | -                     | -                      |
| Burundi                  | 0.0012±0.0040         | 0.1153±0.3651         | <b>2003</b> | 0.0270±0.0237         | 2.7809±2.4419         | <b>-0.012±0.0050</b>  | <b>-1.0016±0.4169</b>  |
| Cambodia                 | <b>0.0203±0.0042</b>  | <b>2.6936±0.5543</b>  | <b>2001</b> | -0.0483±0.0242        | -5.2500±2.6257        | <b>0.0255±0.0060</b>  | <b>3.1563±0.7381</b>   |
| Cameroon                 | -0.0039±0.0033        | -0.2747±0.2341        | <b>2009</b> | 0.0078±0.0063         | 0.5757±0.4651         | <b>-0.0272±0.0107</b> | <b>-1.8324±0.7201</b>  |
| Canada                   | <b>-0.0054±0.0015</b> | <b>-1.2625±0.3547</b> | <b>2005</b> | <b>0.0120±0.0036</b>  | <b>3.4985±1.0472</b>  | <b>-0.0175±0.0029</b> | <b>-3.69±0.6161</b>    |
| Cape Verde               | <b>-0.0046±0.0021</b> | <b>-1.1166±0.4999</b> | <b>2012</b> | 0.0037±0.0028         | 1.0087±0.7792         | <b>-0.0456±0.0079</b> | <b>-10.6582±1.8546</b> |
| Cayman Islands           | <b>-0.0091±0.0022</b> | <b>-1.2414±0.3039</b> | -           | -                     | -                     | -                     | -                      |
| Central African Republic | -0.0005±0.0046        | -0.0343±0.3148        | <b>2009</b> | <b>0.0207±0.0081</b>  | <b>1.5706±0.6150</b>  | <b>-0.0447±0.0118</b> | <b>-2.7184±0.7187</b>  |
| Chad                     | <b>-0.0062±0.0022</b> | <b>-0.7262±0.2563</b> | -           | -                     | -                     | -                     | -                      |
| Chile                    | <b>0.0093±0.0024</b>  | <b>2.4781±0.6342</b>  | <b>2000</b> | -0.0469±0.0246        | -8.3516±4.3721        | <b>0.0178±0.0022</b>  | <b>5.6681±0.6909</b>   |
| China                    | <b>0.1191±0.0196</b>  | <b>7.5499±1.2398</b>  | <b>2011</b> | <b>0.1939±0.0196</b>  | <b>17.6742±1.7839</b> | <b>-0.2872±0.0480</b> | <b>-6.2108±1.0379</b>  |

|                               |                       |                       |             |                       |                        |                       |                        |
|-------------------------------|-----------------------|-----------------------|-------------|-----------------------|------------------------|-----------------------|------------------------|
| Colombia                      | <b>0.0073±0.0024</b>  | <b>1.1163±0.3690</b>  | -           | -                     | -                      | -                     | -                      |
| Commonwealth of Dominica      | <b>-0.0121±0.0016</b> | <b>-2.5697±0.3474</b> | -           | -                     | -                      | -                     | -                      |
| Comoros                       | -0.0010±0.0015        | -0.3054±0.4627        | -           | -                     | -                      | -                     | -                      |
| Congo                         | <b>0.0080±0.0027</b>  | <b>0.6284±0.2151</b>  | -           | -                     | -                      | -                     | -                      |
| Congo Democratic Republic     | <b>-0.0056±0.0024</b> | <b>-0.3605±0.1565</b> | <b>2009</b> | 0.0019±0.0043         | 0.1245±0.2862          | <b>-0.0263±0.0089</b> | <b>-1.6575±0.5613</b>  |
| Cook Islands                  | <b>-0.0089±0.0011</b> | <b>-3.3181±0.3921</b> | -           | -                     | -                      | -                     | -                      |
| Costa Rica                    | -0.0020±0.0026        | -0.3007±0.3880        | <b>2002</b> | <b>-0.0494±0.0209</b> | <b>-5.9015±2.4891</b>  | <b>0.0061±0.0025</b>  | <b>1.0466±0.4383</b>   |
| Croatia                       | <b>-0.0494±0.0080</b> | <b>-1.6316±0.2634</b> | -           | -                     | -                      | -                     | -                      |
| Cuba                          | -0.0027±0.0023        | -0.3068±0.2671        | -           | -                     | -                      | -                     | -                      |
| Cyprus                        | 0.0052±0.0050         | 0.3552±0.3362         | <b>2012</b> | 0.0137±0.0071         | 0.9659±0.5015          | <b>-0.0947±0.0222</b> | <b>-5.1421±1.2077</b>  |
| Czech Republic                | <b>-0.0377±0.0171</b> | <b>-0.8947±0.4055</b> | <b>2010</b> | 0.0109±0.0340         | 0.2764±0.8620          | <b>-0.1432±0.0434</b> | <b>-3.5321±1.0702</b>  |
| Denmark                       | <b>-0.0449±0.0108</b> | <b>-1.2981±0.3135</b> | -           | -                     | -                      | -                     | -                      |
| Djibouti                      | -0.0032±0.0017        | -0.4467±0.2427        | <b>2002</b> | <b>-0.0510±0.0094</b> | <b>-5.8558±1.0823</b>  | 0.0035±0.0021         | 0.5575±0.3414          |
| Dominican Republic            | -0.0029±0.0032        | -0.2586±0.2889        | -           | -                     | -                      | -                     | -                      |
| East Timor                    | -0.0037±0.0032        | -0.9943±0.8493        | <b>2006</b> | 0.0151±0.0093         | 5.4103±3.3292          | <b>-0.0252±0.0062</b> | <b>-5.2562±1.2851</b>  |
| Ecuador                       | <b>0.0294±0.0024</b>  | <b>7.4325±0.6026</b>  | <b>2001</b> | -0.0246±0.0185        | -4.6569±3.5030         | <b>0.0327±0.0037</b>  | <b>6.5174±0.7347</b>   |
| Egypt                         | 0.0017±0.0025         | 0.1842±0.2703         | <b>2003</b> | <b>-0.0284±0.0125</b> | <b>-2.7923±1.2302</b>  | 0.006±0.0034          | 0.6797±0.3837          |
| El Salvador                   | <b>0.0200±0.0049</b>  | <b>1.7220±0.4242</b>  | <b>2012</b> | <b>0.0251±0.0067</b>  | <b>2.2340±0.5990</b>   | -0.0494±0.0329        | -2.952±1.9641          |
| Equatorial Guinea             | <b>0.0088±0.0044</b>  | <b>0.9342±0.4636</b>  | <b>2010</b> | <b>0.0252±0.0086</b>  | <b>2.9906±1.0231</b>   | -0.0202±0.0110        | -1.7862±0.9737         |
| Eritrea                       | <b>-0.0073±0.0025</b> | <b>-1.0382±0.3608</b> | -           | -                     | -                      | -                     | -                      |
| Estonia                       | -0.0048±0.0054        | -0.3919±0.4353        | -           | -                     | -                      | -                     | -                      |
| Ethiopia                      | <b>-0.0047±0.002</b>  | <b>-0.5892±0.2548</b> | -           | -                     | -                      | -                     | -                      |
| Falkland Islands              | -0.0033±0.0019        | -69.3594±39.6276      | -           | -                     | -                      | -                     | -                      |
| Federated State of Micronesia | -0.0001±0.0023        | -0.2939±4.9102        | <b>2011</b> | <b>0.0109±0.0029</b>  | <b>45.4599±12.3399</b> | <b>-0.0407±0.0104</b> | <b>-26.455±6.7765</b>  |
| Fiji                          | 0.0001±0.0013         | 0.0509±0.8109         | -           | -                     | -                      | -                     | -                      |
| France                        | <b>-0.0555±0.0107</b> | <b>-1.4957±0.2879</b> | -           | -                     | -                      | -                     | -                      |
| French Guiana                 | <b>-0.0033±0.0016</b> | <b>-1.8853±0.8973</b> | <b>2012</b> | 0.0032±0.0020         | 2.3543±1.4845          | <b>-0.0409±0.0106</b> | <b>-19.466±5.0652</b>  |
| French Polynesia              | <b>-0.0083±0.0010</b> | <b>-3.5699±0.4529</b> | -           | -                     | -                      | -                     | -                      |
| FYROM                         | <b>0.0506±0.0087</b>  | <b>4.7737±0.8199</b>  | <b>2011</b> | <b>0.0921±0.0127</b>  | <b>11.2700±1.5584</b>  | -0.0382±0.0284        | -1.9504±1.4509         |
| Gabon                         | <b>0.0076±0.0025</b>  | <b>0.7616±0.2480</b>  | <b>2010</b> | <b>0.0168±0.0047</b>  | <b>1.7778±0.4998</b>   | <b>-0.0132±0.0066</b> | <b>-1.1266±0.5611</b>  |
| Gambia                        | -0.0056±0.0030        | -0.5191±0.2751        | -           | -                     | -                      | -                     | -                      |
| Georgia                       | <b>0.0185±0.0030</b>  | <b>3.3733±0.5425</b>  | <b>2002</b> | -0.0303±0.0167        | -4.3192±2.3737         | <b>0.0231±0.0047</b>  | <b>3.7750±0.7683</b>   |
| Germany                       | <b>-0.1115±0.0145</b> | <b>-1.5775±0.2050</b> | -           | -                     | -                      | -                     | -                      |
| Ghana                         | <b>-0.0130±0.0036</b> | <b>-0.9709±0.2703</b> | -           | -                     | -                      | -                     | -                      |
| Greece                        | <b>-0.0115±0.0050</b> | <b>-0.5762±0.2488</b> | <b>2012</b> | 0.0096±0.0065         | 0.5160±0.3497          | <b>-0.0804±0.02</b>   | <b>-4.2204±1.0521</b>  |
| Grenada                       | <b>-0.0136±0.0027</b> | <b>-2.1570±0.4320</b> | -           | -                     | -                      | -                     | -                      |
| Guadeloupe                    | <b>-0.0167±0.0016</b> | <b>-2.5393±0.2428</b> | -           | -                     | -                      | -                     | -                      |
| Guam                          | -0.0026±0.0027        | -0.6095±0.6203        | -           | -                     | -                      | -                     | -                      |
| Guatemala                     | <b>-0.0084±0.0030</b> | <b>-0.7180±0.2533</b> | <b>2006</b> | <b>-0.0305±0.0091</b> | <b>-2.4037±0.7162</b>  | 0.0059±0.0049         | 0.5876±0.4919          |
| Guernsey                      | <b>-0.0640±0.0212</b> | <b>-1.9431±0.6456</b> | -           | -                     | -                      | -                     | -                      |
| Guinea                        | <b>-0.0061±0.0030</b> | <b>-0.5327±0.2586</b> | -           | -                     | -                      | -                     | -                      |
| Guinea-Bissau                 | <b>-0.0086±0.0031</b> | <b>-0.7848±0.2784</b> | -           | -                     | -                      | -                     | -                      |
| Guyana                        | -0.0017±0.0016        | -0.7935±0.7515        | <b>2011</b> | <b>0.0054±0.0023</b>  | <b>3.1970±1.3736</b>   | <b>-0.0273±0.0068</b> | <b>-10.6217±2.6354</b> |
| Haiti                         | -0.0016±0.0025        | -0.1687±0.2621        | <b>2005</b> | <b>-0.0278±0.0079</b> | <b>-2.5883±0.7390</b>  | <b>0.0103±0.0044</b>  | <b>1.200±0.5168</b>    |
| Honduras                      | <b>0.0096±0.0027</b>  | <b>1.3414±0.3820</b>  | <b>2011</b> | <b>0.0132±0.0049</b>  | <b>1.9054±0.7064</b>   | <b>-0.0238±0.0103</b> | <b>-2.4065±1.0362</b>  |
| Hong Kong                     | -0.1302±0.0772        | -0.7319±0.4341        | <b>2004</b> | <b>0.9438±0.3372</b>  | <b>7.1514±2.5554</b>   | <b>-0.5415±0.1310</b> | <b>-2.7016±0.6538</b>  |
| Hungary                       | <b>-0.0554±0.0088</b> | <b>-1.2961±0.2056</b> | -           | -                     | -                      | -                     | -                      |
| India                         | <b>0.0238±0.0024</b>  | <b>1.5622±0.1581</b>  | -           | -                     | -                      | -                     | -                      |
| Indonesia                     | 0.0039±0.0032         | 0.7211±0.5851         | -           | -                     | -                      | -                     | -                      |
| Iran                          | <b>0.0320±0.0028</b>  | <b>3.2601±0.2806</b>  | <b>2012</b> | <b>0.0396±0.0039</b>  | <b>4.2237±0.4127</b>   | -0.0193±0.0104        | -1.2015±0.6469         |
| Iraq                          | <b>0.0638±0.0054</b>  | <b>6.7853±0.5747</b>  | <b>2012</b> | <b>0.0673±0.0077</b>  | <b>7.3758±0.8428</b>   | <b>-0.0509±0.0151</b> | <b>-2.1909±0.6517</b>  |

|                                   |                       |                       |      |                       |                        |                       |                        |
|-----------------------------------|-----------------------|-----------------------|------|-----------------------|------------------------|-----------------------|------------------------|
| Ireland                           | -0.0173±0.0117        | -1.1594±0.7837        | 2008 | 0.0331±0.0304         | 2.6778±2.4644          | -0.0604±0.0275        | -4.1221±1.8770         |
| Isle of Man                       | <b>-0.0648±0.0193</b> | <b>-2.3836±0.7102</b> | -    | -                     | -                      | -                     | -                      |
| Israel                            | -0.0126±0.0066        | -0.3293±0.1732        | -    | -                     | -                      | -                     | -                      |
| Italy                             | <b>-0.0836±0.0103</b> | <b>-1.6759±0.2071</b> | -    | -                     | -                      | -                     | -                      |
| Ivory Coast                       | <b>-0.0080±0.0032</b> | <b>-0.7659±0.3082</b> | -    | -                     | -                      | -                     | -                      |
| Jamaica                           | -0.0050±0.0029        | -0.4498±0.2637        | -    | -                     | -                      | -                     | -                      |
| Japan                             | <b>-0.0710±0.0067</b> | <b>-1.7426±0.1647</b> | -    | -                     | -                      | -                     | -                      |
| Jersey                            | -0.0349±0.0191        | -1.2325±0.6748        | -    | -                     | -                      | -                     | -                      |
| Jordan                            | -0.0023±0.0030        | -0.1431±0.1897        | 2012 | 0.0023±0.0041         | 0.1461±0.2623          | <b>-0.0786±0.0171</b> | <b>-4.4119±0.9570</b>  |
| Kazakhstan                        | <b>0.0146±0.0017</b>  | <b>2.8402±0.3358</b>  | 2011 | <b>0.0214±0.0023</b>  | <b>4.5142±0.4865</b>   | -0.0163±0.0088        | -1.9778±1.0691         |
| Kenya                             | 0.0002±0.0030         | 0.0458±0.6632         | 2009 | <b>0.0132±0.0039</b>  | <b>3.6187±1.0779</b>   | <b>-0.0354±0.0101</b> | <b>-5.872±1.6733</b>   |
| Kiribati                          | <b>-0.0047±0.0017</b> | <b>-4.8275±1.7292</b> | 2011 | <b>0.0030±0.0015</b>  | <b>6.3332±3.1309</b>   | <b>-0.0387±0.0085</b> | <b>-30.8337±6.7273</b> |
| Korea                             | <b>0.1005±0.0225</b>  | <b>1.3558±0.3042</b>  | -    | -                     | -                      | -                     | -                      |
| Korea Dem. Peoples Rep. of        | <b>0.0817±0.0146</b>  | <b>10.7852±1.9232</b> | 2012 | <b>0.1409±0.0192</b>  | <b>38.0448±5.1952</b>  | <b>-0.2655±0.0958</b> | <b>-9.319±3.3648</b>   |
| Kuwait                            | <b>0.1001±0.0071</b>  | <b>3.7793±0.2697</b>  | 2012 | <b>0.1027±0.0111</b>  | <b>3.9036±0.4171</b>   | -0.0438±0.0420        | -0.9225±0.8847         |
| Kyrgyz Republic                   | <b>0.0054±0.0022</b>  | <b>0.8492±0.3449</b>  | -    | -                     | -                      | -                     | -                      |
| Lao Peoples Democratic Republic   | <b>0.0117±0.0037</b>  | <b>1.4097±0.4467</b>  | 2002 | <b>-0.0536±0.0177</b> | <b>-5.2885±1.7500</b>  | <b>0.0156±0.0056</b>  | <b>1.7881±0.6434</b>   |
| Latvia                            | 0.0028±0.0049         | 0.2564±0.4522         | -    | -                     | -                      | -                     | -                      |
| Lebanon                           | <b>0.1664±0.0159</b>  | <b>5.0536±0.4835</b>  | -    | -                     | -                      | -                     | -                      |
| Lesotho                           | -0.008±0.0064         | -0.5481±0.4428        | 2005 | <b>-0.0478±0.0220</b> | <b>-2.9513±1.3542</b>  | 0.0074±0.0137         | 0.5805±1.0714          |
| Liberia                           | <b>-0.0116±0.0032</b> | <b>-1.2165±0.3359</b> | -    | -                     | -                      | -                     | -                      |
| Libyan Arab Jamahiriya            | <b>-0.0055±0.0016</b> | <b>-1.1710±0.3496</b> | -    | -                     | -                      | -                     | -                      |
| Lithuania                         | <b>0.0188±0.0073</b>  | <b>1.5486±0.5984</b>  | -    | -                     | -                      | -                     | -                      |
| Luxembourg                        | 0.0034±0.0392         | 0.0634±0.7325         | -    | -                     | -                      | -                     | -                      |
| Madagascar                        | 0.0000±0.0016         | -0.0070±0.2623        | 2002 | <b>-0.0385±0.0096</b> | <b>-5.1708±1.2862</b>  | <b>0.0055±0.0019</b>  | <b>0.9849±0.3454</b>   |
| Malawi                            | -0.0014±0.0022        | -0.1548±0.2420        | 2011 | 0.0042±0.0035         | 0.4749±0.3992          | <b>-0.0212±0.0071</b> | <b>-2.2921±0.7663</b>  |
| Malaysia                          | <b>0.0088±0.0031</b>  | <b>0.9991±0.3482</b>  | -    | -                     | -                      | -                     | -                      |
| Maldives                          | -0.0043±0.0025        | -1.9645±1.1350        | 2011 | <b>0.0116±0.0024</b>  | <b>9.7829±2.0585</b>   | <b>-0.0554±0.0079</b> | <b>-19.3643±2.7647</b> |
| Mali                              | <b>-0.0038±0.0018</b> | <b>-0.5706±0.2695</b> | -    | -                     | -                      | -                     | -                      |
| Malta                             | <b>0.0177±0.0052</b>  | <b>1.5767±0.4593</b>  | 2006 | <b>0.0483±0.0142</b>  | <b>5.1252±1.5113</b>   | <b>-0.0349±0.0107</b> | <b>-2.1134±0.6484</b>  |
| Marshall Islands                  | <b>-0.0035±0.0016</b> | <b>-3.0714±1.3829</b> | 2011 | 0.0034±0.0018         | 4.9668±2.6177          | <b>-0.0335±0.0062</b> | <b>-22.2594±4.0904</b> |
| Martinique                        | <b>-0.0190±0.0023</b> | <b>-2.4121±0.2888</b> | -    | -                     | -                      | -                     | -                      |
| Mauritania                        | -0.0031±0.0016        | -0.6654±0.3591        | -    | -                     | -                      | -                     | -                      |
| Mauritius                         | <b>-0.0114±0.0022</b> | <b>-1.3819±0.2653</b> | -    | -                     | -                      | -                     | -                      |
| Mayotte                           | 0.0011±0.0022         | 0.2960±0.5994         | -    | -                     | -                      | -                     | -                      |
| Mexico                            | 0.0029±0.0022         | 0.2644±0.1982         | 2012 | <b>0.0094±0.0029</b>  | <b>0.8960±0.2735</b>   | <b>-0.0463±0.0126</b> | <b>-3.6619±0.9999</b>  |
| Mongolia                          | 0.0001±0.0010         | 0.0302±0.5091         | 2000 | <b>-0.0251±0.0093</b> | <b>-9.2670±3.4436</b>  | 0.0019±0.0012         | 1.1074±0.6748          |
| Morocco (includes Western Sahara) | <b>0.0046±0.0018</b>  | <b>0.9063±0.3534</b>  | 2012 | <b>0.0076±0.0027</b>  | <b>1.5619±0.5433</b>   | <b>-0.036±0.0072</b>  | <b>-5.0847±1.0175</b>  |
| Mozambique                        | <b>-0.0089±0.0022</b> | <b>-0.8153±0.2054</b> | -    | -                     | -                      | -                     | -                      |
| Myanmar                           | -0.0026±0.0026        | -0.3232±0.3206        | -    | -                     | -                      | -                     | -                      |
| Namibia                           | <b>-0.0096±0.0030</b> | <b>-1.0167±0.3168</b> | 2002 | <b>-0.0642±0.0196</b> | <b>-5.5977±1.7121</b>  | 0.0004±0.0031         | 0.0461±0.3877          |
| Nepal                             | 0.0007±0.0025         | 0.0722±0.2672         | -    | -                     | -                      | -                     | -                      |
| Netherland Antilles               | 0.0021±0.0025         | 0.3510±0.4331         | 2001 | <b>-0.0605±0.0147</b> | <b>-8.2963±2.0119</b>  | 0.0015±0.0035         | 0.2542±0.5855          |
| Netherlands                       | <b>-0.2963±0.0235</b> | <b>-2.3311±0.1849</b> | -    | -                     | -                      | -                     | -                      |
| New Caledonia                     | <b>-0.0045±0.0015</b> | <b>-1.3034±0.4415</b> | -    | -                     | -                      | -                     | -                      |
| New Zealand                       | -0.0020±0.0015        | -0.8321±0.6331        | 2002 | <b>-0.0275±0.0075</b> | <b>-8.7459±2.3723</b>  | 0.0017±0.0024         | 0.9180±1.2578          |
| Nicaragua                         | 0.0005±0.0030         | 0.0923±0.5200         | -    | -                     | -                      | -                     | -                      |
| Niger                             | -0.0019±0.0017        | -0.3483±0.3195        | 2011 | 0.0018±0.0025         | 0.3571±0.4931          | <b>-0.0255±0.0085</b> | <b>-4.3612±1.4539</b>  |
| Nigeria                           | -0.0024±0.0033        | -0.1596±0.2165        | -    | -                     | -                      | -                     | -                      |
| Northern Mariana Islands          | 0.0040±0.0021         | 3.2417±1.7180         | 2001 | <b>-0.0382±0.0101</b> | <b>-18.7322±4.9383</b> | 0.0038±0.0032         | 2.5953±2.1825          |
| Norway                            | -0.0035±0.0027        | -0.6086±0.4752        | -    | -                     | -                      | -                     | -                      |



|                                |                       |                        |             |                       |                         |                       |                        |
|--------------------------------|-----------------------|------------------------|-------------|-----------------------|-------------------------|-----------------------|------------------------|
| Occupied Palestinian Territory | <b>-0.0290±0.0113</b> | <b>-0.4670±0.1826</b>  | <b>2006</b> | 0.0314±0.0349         | 0.5336±0.5925           | <b>-0.0739±0.0238</b> | <b>-1.1904±0.3839</b>  |
| Oman                           | 0.0014±0.0017         | 0.2335±0.2796          | <b>2011</b> | 0.0038±0.0029         | 0.6574±0.5016           | <b>-0.0191±0.0041</b> | <b>-2.7691±0.5890</b>  |
| Pakistan                       | <b>0.0208±0.0030</b>  | <b>2.3023±0.3363</b>   | <b>2011</b> | <b>0.0335±0.0044</b>  | <b>4.0560±0.5381</b>    | <b>-0.0242±0.0088</b> | <b>-1.8079±0.6563</b>  |
| Palau                          | 0.0004±0.0023         | 1.0487±6.5205          | <b>2011</b> | <b>0.0117±0.0034</b>  | <b>35.1571±10.1795</b>  | <b>-0.0263±0.0078</b> | <b>-28.3565±8.4076</b> |
| Panama                         | <b>0.0056±0.0021</b>  | <b>0.9313±0.3520</b>   | <b>2000</b> | -0.0376±0.0245        | -4.9519±3.2328          | <b>0.0112±0.0023</b>  | <b>1.9829±0.4106</b>   |
| Papua New Guinea               | -0.0011±0.0017        | -0.4199±0.6719         | <b>2012</b> | 0.0045±0.0024         | 2.0089±1.0687           | <b>-0.0340±0.0077</b> | <b>-10.8245±2.4424</b> |
| Paraguay                       | <b>0.0184±0.0054</b>  | <b>2.5541±0.7540</b>   | <b>2000</b> | -0.0602±0.0494        | -5.7158±4.6892          | <b>0.0361±0.0060</b>  | <b>6.2212±1.0286</b>   |
| Peru                           | <b>0.0048±0.0023</b>  | <b>1.0578±0.5008</b>   | <b>2010</b> | <b>0.0139±0.0034</b>  | <b>3.5134±0.8623</b>    | <b>-0.0289±0.0077</b> | <b>-4.5065±1.195</b>   |
| Philippines                    | <b>-0.0064±0.0023</b> | <b>-0.9782±0.3435</b>  | -           | -                     | -                       | -                     | -                      |
| Poland                         | <b>-0.0245±0.0092</b> | <b>-0.6191±0.2323</b>  | -           | -                     | -                       | -                     | -                      |
| Portugal                       | -0.008±0.0107         | -0.4469±0.5982         | <b>2005</b> | <b>0.1169±0.0264</b>  | <b>9.9875±2.2602</b>    | <b>-0.0933±0.0158</b> | <b>-4.0221±0.6799</b>  |
| Puerto Rico                    | <b>-0.0222±0.0035</b> | <b>-1.5354±0.2396</b>  | <b>2005</b> | 0.0062±0.0121         | 0.4776±0.9298           | <b>-0.0490±0.0049</b> | <b>-3.375±0.3392</b>   |
| Qatar                          | <b>0.0880±0.0086</b>  | <b>2.8375±0.2772</b>   | <b>2004</b> | -0.0051±0.0286        | -0.1483±0.8283          | <b>0.1094±0.0165</b>  | <b>3.0132±0.4541</b>   |
| Republic of Moldova            | <b>0.0232±0.0078</b>  | <b>1.3517±0.4519</b>   | <b>2000</b> | <b>-0.1921±0.0619</b> | <b>-8.7806±2.8311</b>   | <b>0.0313±0.0105</b>  | <b>1.8294±0.6159</b>   |
| Reunion                        | <b>-0.0087±0.0029</b> | <b>-0.9711±0.3196</b>  | -           | -                     | -                       | -                     | -                      |
| Romania                        | <b>-0.0095±0.0041</b> | <b>-0.4375±0.1893</b>  | -           | -                     | -                       | -                     | -                      |
| Russia                         | <b>0.0065±0.0018</b>  | <b>1.2970±0.3503</b>   | <b>2000</b> | <b>-0.0204±0.0072</b> | <b>-3.7857±1.3259</b>   | <b>0.0053±0.0023</b>  | <b>0.9787±0.4302</b>   |
| Rwanda                         | 0.0048±0.0036         | 0.4227±0.3124          | -           | -                     | -                       | -                     | -                      |
| Saint Helena                   | 0.002±0.0034          | 0.6229±1.0762          | <b>2000</b> | <b>-0.0944±0.0301</b> | <b>-16.3114±5.2061</b>  | 0.0081±0.0041         | 3.2262±1.6367          |
| Saint Lucia                    | <b>-0.0111±0.002</b>  | <b>-2.2482±0.4113</b>  | -           | -                     | -                       | -                     | -                      |
| Saint Pierre and Miquelon      | 0.0046±0.0049         | 18.3108±19.2788        | -           | -                     | -                       | -                     | -                      |
| Saint Vincent                  | -0.0024±0.0018        | -0.6429±0.4857         | <b>2011</b> | 0.0054±0.0028         | 1.6802±0.8685           | <b>-0.0394±0.006</b>  | <b>-8.7857±1.3412</b>  |
| Sao Tome and Principe          | 0.0043±0.0025         | 0.6455±0.3720          | <b>2010</b> | 0.0071±0.0048         | 1.1260±0.7615           | <b>-0.0182±0.008</b>  | <b>-2.2260±0.9838</b>  |
| Saudi Arabia                   | 0.0013±0.0020         | 0.1253±0.1958          | <b>2011</b> | 0.0007±0.0036         | 0.0715±0.3454           | <b>-0.0307±0.0049</b> | <b>-2.5586±0.4086</b>  |
| Senegal                        | -0.0013±0.0025        | -0.1413±0.2828         | <b>2011</b> | 0.0057±0.0038         | 0.6671±0.4461           | <b>-0.0341±0.0122</b> | <b>-3.4912±1.2513</b>  |
| Serbia and Montenegro          | 0.0096±0.0072         | 0.4544±0.3430          | -           | -                     | -                       | -                     | -                      |
| Seychelles                     | <b>0.0100±0.0028</b>  | <b>90.5183±25.5488</b> | <b>2000</b> | <b>-0.0344±0.0166</b> | <b>-98.5144±47.5564</b> | 0.0041±0.0035         | 3.5286±2.9576          |
| Sierra Leone                   | -0.0019±0.0032        | -0.1684±0.2927         | <b>2002</b> | <b>-0.0560±0.0244</b> | <b>-4.5381±1.9821</b>   | 0.0001±0.0043         | 0.0064±0.3946          |
| Singapore                      | 0.0213±0.0459         | 0.2280±0.4915          | -           | -                     | -                       | -                     | -                      |
| Slovakia                       | <b>-0.0312±0.0098</b> | <b>-0.9573±0.3003</b>  | -           | -                     | -                       | -                     | -                      |
| Slovenia                       | <b>-0.0788±0.0114</b> | <b>-1.8982±0.2752</b>  | -           | -                     | -                       | -                     | -                      |
| Solomon Islands                | -0.0028±0.0017        | -2.4917±1.5541         | <b>2011</b> | <b>0.0082±0.0015</b>  | <b>19.3010±3.5311</b>   | <b>-0.0456±0.0063</b> | <b>-24.4952±3.4029</b> |
| Somalia                        | -0.003±0.0016         | -0.9000±0.4692         | -           | -                     | -                       | -                     | -                      |
| South Africa                   | <b>-0.0198±0.0041</b> | <b>-0.7815±0.1604</b>  | -           | -                     | -                       | -                     | -                      |
| Spain                          | <b>-0.0291±0.0078</b> | <b>-1.2120±0.3263</b>  | <b>2006</b> | <b>0.0588±0.0180</b>  | <b>2.9974±0.9178</b>    | <b>-0.0802±0.0109</b> | <b>-3.3243±0.4535</b>  |
| Sri Lanka                      | <b>0.0102±0.0026</b>  | <b>1.9198±0.4955</b>   | <b>2012</b> | <b>0.0227±0.0032</b>  | <b>5.0066±0.6998</b>    | <b>-0.0346±0.0125</b> | <b>-4.5187±1.6306</b>  |
| Sudan                          | <b>-0.0064±0.0027</b> | <b>-0.6923±0.2884</b>  | -           | -                     | -                       | -                     | -                      |
| Suriname                       | <b>-0.0056±0.0012</b> | <b>-2.2856±0.5028</b>  | -           | -                     | -                       | -                     | -                      |
| Swaziland                      | <b>0.1794±0.0401</b>  | <b>2.8767±0.6426</b>   | -           | -                     | -                       | -                     | -                      |
| Sweden                         | -0.0165±0.0085        | -1.4335±0.7371         | <b>2010</b> | 0.0047±0.0157         | 0.4572±1.5157           | <b>-0.1017±0.0336</b> | <b>-8.0913±2.6696</b>  |
| Switzerland                    | <b>-0.0308±0.0080</b> | <b>-1.0130±0.2632</b>  | -           | -                     | -                       | -                     | -                      |
| Syrian Arab Republic           | <b>0.0188±0.0061</b>  | <b>1.1265±0.3665</b>   | <b>2012</b> | <b>0.0487±0.0069</b>  | <b>3.2961±0.4683</b>    | <b>-0.1024±0.0161</b> | <b>-4.7261±0.7427</b>  |
| Taiwan                         | <b>-0.1192±0.0125</b> | <b>-1.7961±0.1878</b>  | -           | -                     | -                       | -                     | -                      |
| Tajikistan                     | -0.0053±0.0032        | -0.6894±0.4173         | -           | -                     | -                       | -                     | -                      |
| Thailand                       | <b>0.0185±0.0041</b>  | <b>1.3299±0.2967</b>   | <b>2001</b> | <b>-0.0844±0.0270</b> | <b>-5.1037±1.6331</b>   | <b>0.0283±0.0054</b>  | <b>2.0382±0.3893</b>   |
| Togo                           | -0.0025±0.0040        | -0.1975±0.3190         | <b>2011</b> | <b>0.0159±0.0053</b>  | <b>1.3835±0.4578</b>    | -0.0315±0.0243        | -2.4742±1.9129         |
| Tonga                          | <b>-0.0058±0.0014</b> | <b>-2.597±0.6438</b>   | -           | -                     | -                       | -                     | -                      |
| Trinidad and Tobago            | 0.0048±0.0030         | 0.7763±0.4876          | <b>2011</b> | <b>0.0121±0.0049</b>  | <b>2.1233±0.8502</b>    | <b>-0.0341±0.0128</b> | <b>-4.2440±1.5982</b>  |
| Tunisia                        | <b>0.0075±0.0020</b>  | <b>1.0234±0.2715</b>   | <b>2012</b> | <b>0.0122±0.0027</b>  | <b>1.7361±0.3808</b>    | <b>-0.0419±0.0109</b> | <b>-4.2392±1.1033</b>  |
| Turkey                         | <b>0.0152±0.0038</b>  | <b>1.1898±0.2942</b>   | <b>2012</b> | <b>0.0166±0.0057</b>  | <b>1.3080±0.4521</b>    | -0.0136±0.0223        | -0.8418±1.3730         |
| Turkmenistan                   | <b>0.0080±0.0018</b>  | <b>1.3365±0.3058</b>   | <b>2012</b> | <b>0.0126±0.0026</b>  | <b>2.2023±0.4633</b>    | <b>-0.0207±0.0092</b> | <b>-2.5887±1.1523</b>  |

|                              |                       |                       |             |                      |                      |                       |                        |
|------------------------------|-----------------------|-----------------------|-------------|----------------------|----------------------|-----------------------|------------------------|
| Turks and Caicos Islands     | <b>-0.0104±0.0022</b> | <b>-1.4248±0.2947</b> | -           | -                    | -                    | -                     | -                      |
| Uganda                       | 0.0040±0.0031         | 0.4122±0.3204         | -           | -                    | -                    | -                     | -                      |
| Ukraine                      | <b>0.0230±0.0056</b>  | <b>1.1157±0.2737</b>  | <b>2000</b> | -0.0999±0.0573       | -4.3258±2.4805       | <b>0.0247±0.0072</b>  | <b>1.1630±0.3410</b>   |
| United Arab Emirates         | <b>0.0408±0.0043</b>  | <b>1.9971±0.2082</b>  | <b>2008</b> | <b>0.0594±0.0101</b> | <b>3.0777±0.5209</b> | -0.0076±0.0108        | -0.2738±0.3884         |
| United Kingdom               | <b>-0.1382±0.0145</b> | <b>-2.3057±0.2412</b> | -           | -                    | -                    | -                     | -                      |
| United Rep. of Tanzania      | 0.0019±0.0025         | 0.2627±0.3447         | <b>2009</b> | <b>0.0120±0.0039</b> | <b>1.8099±0.5831</b> | <b>-0.0247±0.0092</b> | <b>-2.9026±1.0848</b>  |
| United States of America     | <b>-0.0599±0.0056</b> | <b>-2.3570±0.2204</b> | -           | -                    | -                    | -                     | -                      |
| United States Virgin Islands | <b>-0.0063±0.0028</b> | <b>-1.1100±0.5002</b> | <b>2010</b> | 0.0082±0.0051        | 1.6927±1.0481        | <b>-0.0431±0.0074</b> | <b>-7.0744±1.2163</b>  |
| Uruguay                      | <b>0.01300±0.0035</b> | <b>2.1241±0.5704</b>  | <b>2001</b> | -0.0345±0.0231       | -4.313±2.8919        | <b>0.0226±0.0047</b>  | <b>3.915±0.8233</b>    |
| Uzbekistan                   | <b>0.0159±0.0017</b>  | <b>2.2855±0.2471</b>  | -           | -                    | -                    | -                     | -                      |
| Vanuatu                      | <b>-0.0049±0.0015</b> | <b>-2.0351±0.6135</b> | -           | -                    | -                    | -                     | -                      |
| Venezuela                    | -0.0013±0.0026        | -0.1965±0.3938        | -           | -                    | -                    | -                     | -                      |
| Viet Nam                     | <b>0.0331±0.0036</b>  | <b>4.5861±0.4982</b>  | <b>2002</b> | -0.0215±0.0188       | -2.3865±2.0850       | <b>0.0409±0.0053</b>  | <b>4.8399±0.6269</b>   |
| Western Samoa                | <b>-0.0043±0.0016</b> | <b>-2.9344±1.0942</b> | <b>2011</b> | 0.0006±0.0026        | 0.5205±2.1668        | <b>-0.0264±0.0064</b> | <b>-17.4793±4.2234</b> |
| Yemen                        | 0.0002±0.0021         | 0.0255±0.3355         | <b>2012</b> | 0.0053±0.0028        | 0.9131±0.4802        | <b>-0.0393±0.0086</b> | <b>-5.4864±1.2043</b>  |
| Zambia                       | -0.0017±0.0021        | -0.1651±0.2030        | -           | -                    | -                    | -                     | -                      |
| Zimbabwe                     | <b>-0.0081±0.0031</b> | <b>-0.6798±0.2654</b> | -           | -                    | -                    | -                     | -                      |
