# Supplementary material for: Trends and trend reversal detection in two decades of tropospheric NO 2 satellite observations
Source: Copernicus journal article supplement (doi:10.5194/acp-2018-988), 2018-11-02
Supplement: Supplementary file [file acp-2018-988-RC1-supplement.pdf]

# Trends and trend reversal detection in two decades of tropospheric NO<sub>2</sub> satellite observations

Aristeidis K. Georgoulas<sup>1,a,b\*</sup>, Ronald J. van der A<sup>1</sup>, Piet Stammes<sup>1</sup>, K. Folkert Boersma<sup>1,2</sup>, Henk J. Eskes<sup>1</sup>

5 <sup>1</sup>Royal Netherlands Meteorological Institute (KNMI), De Bilt, the Netherlands

<sup>2</sup>Wageningen University, Wageningen, the Netherlands

<sup>a</sup>current address: Institute for Astronomy, Astrophysics, Space Application and Remote Sensing, National Observatory of Athens, Athens, Greece

10 <sup>b</sup>current address: Department of Meteorology and Climatology, School of Geology, Aristotle University of Thessaloniki, Thessaloniki, Greece

*Correspondence to:* Aristeidis K. Georgoulas (ageor@auth.gr)

**Abstract.** In this work, a ~21-years self-consistent global dataset from four different satellite sensors with a mid-morning overpass (GOME/ERS-2, SCIAMACHY/ENVISAT, GOME-2/Metop-A and GOME-2/Metop-B) is compiled to study the long-term tropospheric NO<sub>2</sub> patterns and trends. The GOME and GOME-2 data are "corrected" relative to the SCIAMACHY data in order to reproduce what SCIAMACHY would measure if it was in orbit for the period 4/1996-9/2017. The highest tropospheric NO<sub>2</sub> concentrations are seen over urban, industrialized and highly populated areas and over ship tracks in the oceans. Tropospheric NO<sub>2</sub> has generally decreased during the last two decades over the industrialized and highly populated regions of the Western World (e.g. average decrease of the order of ~49% over the U.S., the Netherlands and the U.K., ~36% over Italy and Japan and ~32% over Germany and France) and increased over developing regions (e.g. average increase of ~160% over China and ~33% over India). It is suggested here that linear trends cannot be used efficiently worldwide for such long periods. Tropospheric NO<sub>2</sub> is very sensitive to socioeconomic changes (e.g. environmental protection policies, economic recession, warfare, etc.) which may cause either short term changes or even a reversal of the trends. The application of a method capable of detecting the year when a reversal of trends happened shows that tropospheric NO<sub>2</sub> concentrations switched from positive to negative trends and vice versa over several regions around the globe. A country-level analysis revealed clusters of countries that exhibit similar positive-to-negative or negative-to-positive reversals while 29 out of a total of 64 examined megacities and large urban agglomerations experienced a trend reversal at some point within the last two decades.

# 1 Introduction

Nitrogen dioxide (NO<sub>2</sub>) constitutes one of the most important air pollutants in the atmosphere being responsible for the air quality degradation in many regions across the Earth. It plays a major role in a number of processes in the troposphere such as the photochemical production of ozone (O<sub>3</sub>) and the formation of nitric acid (HNO<sub>3</sub>) (Seinfeld and Pandis, 2016 and references therein), the formation of nitrate aerosols (Basset and Seinfeld, 1983), and modifies the radiative balance in the atmosphere either directly (by absorbing solar radiation) (Solomon et al., 1999) or indirectly (e.g. by the formation of ozone or the modification of greenhouses gas lifetime such as methane) (Isaksen et al., 2014). In addition, NO<sub>2</sub> has a diverse effect on human health, being toxic at high concentrations. Long exposure to NO<sub>2</sub> may lead to the development of asthma and increase susceptibility to respiratory infections (WHO, 2003).

As NO<sub>2</sub> is largely produced by anthropogenic activities (e.g. transportation, industry, domestic heating, power plants and smelters) it is mostly abundant in urban environments. A small part of the global NO<sub>2</sub> concentration is produced by natural sources such as biomass burning, lightning flashes and soil microbial activity (Hilboll et al. 2013 and references therein). Socioeconomic changes from the beginning of the industrial revolution until today had a critical impact on the NO<sub>2</sub> levels over various locations around the planet (Vestreng et al., 2009). At the same time, the continuous growth of the global population and its concentration into urban agglomerations (cities, megacities, conurbations) led to the development of major NO<sub>2</sub> hotspots which can be detected from space (Schneider et al., 2015).

It has been more than two decades now that a series of sensors onboard sun-synchronous orbit satellites continuously measure the tropospheric NO<sub>2</sub> vertical column density (VCD) at nearly the same time (equator crossing time in mid-morning) offering global coverage at timescales ranging from 6 up to 1 days. The first sensor to measure NO<sub>2</sub> VCDs was the Global Ozone Monitoring Experiment (GOME) (Burrows et al., 1999) onboard European Space Agency (ESA) satellite ERS-2. GOME flew on a sun-synchronous near polar orbit from mid 1995 delivering NO<sub>2</sub> measurements at a nominal spatial resolution of 320 x 40 km<sup>2</sup> (crossing equator time: 10:30 LT) until June 2003 when the ERS-2 tape recorder failed leading to a very low global coverage. Till June 2003 the daily coverage was achieved every three days. Except from the nominal GOME operation, narrow swath mode measurements were taken three days each month at a spatial resolution four times higher (80 x 40 km<sup>2</sup>) (Beirle et al., 2004). In this mode, global coverage was achieved using 12 days of data. Due to a saturation of the visible channels under certain circumstances during the first months of its operation, GOME had a smaller ground pixel (80 x 40 km<sup>2</sup>) (worse ground coverage) until March 1996 when the problem was solved.

GOME was succeeded by the SCanning Imaging Absorption spectroMeter for Atmospheric Cartography (SCIAMACHY) (Burrows et al., 1995; Bovensmann et al., 1999) onboard ESA's satellite ENVISAT. SCIAMACHY was on a sun-synchronous near polar orbit delivering NO<sub>2</sub> measurements at a spatial resolution of 60 x 30 km<sup>2</sup> (crossing equator time: 10:00 LT) from August 2002 until April 2012 when contact was lost. The sensor's global coverage time was six days.

SCIAMACHY was succeeded by two GOME-2 satellite instruments (Callies et al., 2000) onboard Metop-A (October 2006) and Metop-B (September 2012) with morning equator crossing times which were developed by ESA and are

operated by the European Organization for the Exploitation of Meteorological Satellites (EUMETSAT). GOME-2A flies on a sun-synchronous near polar orbit with an equator crossing equator time of 09:30 LT. Originally, GOME-2A had a 1920 km swath and a  $80 \times 40 \text{ km}^2$  footprint covering the earth once every 1.5 days. In July 2013 GOME-2A swath was changed to 960 km and its footprint to  $40 \times 40 \text{ km}^2$ . GOME-2B shares the same characteristics with GOME-2A before July 2013 (Wang et al., 2017). GOME-2A delivers  $\text{NO}_2$  measurements from January 2007 and GOME-2B from January 2013 onwards.

The instruments mentioned above are different by means of their technical characteristics, calibration and their spatial resolution which makes the use of their observations as one single dataset very challenging. Several studies in the past made use of the tropospheric  $\text{NO}_2$  data from the aforementioned sensors simultaneously; however, in most cases, the datasets were either used separately (e.g. van der A et al., 2006; Schneider et al., 2012; Valks et al., 2011) or they were downgraded to a low spatial resolution (e.g. van der A et al., 2008; Konovalov et al., 2010). Some studies have suggested a method that accounts for the spatial resolution difference between GOME and SCIAMACHY observations (e.g. Konovalov et al., 2006, 2008) in order to preserve the high spatial resolution. On top of this correction, Hilboll et al. (2013) suggested a method that accounts for all the other instrumental differences, including instrument-dependent offsets in a fitted trend function. They applied their method on GOME, SCIAMACHY, OMI (Ozone Monitoring Instrument) and GOME-2A data. Geddes et al. (2016) followed a similar approach by applying a spatial resolution and a shift correction on data from GOME, SCIAMACHY and GOME-2A sensors.

Here, we proceed for the first time to the compilation of a ~21-years self-consistent dataset, using morning data from GOME/ERS-2, SCIAMACHY/ENVISAT, GOME-2/Metop-A and GOME-2/Metop-B, by following a three-step procedure. It has to be noted that OMI (Levelt et al., 2006) onboard EOS Aura (2004-today) has also been measuring tropospheric  $\text{NO}_2$  since October 2004; however, its equator crossing time is in the afternoon. Taking into account that tropospheric  $\text{NO}_2$  is characterized by a significant diurnal variability (Boersma et al., 2008), the use of mixed morning and afternoon measurements might insert large uncertainties and hence we decided to focus on morning measurements only. Details about the datasets which are merged along with a description of the methodology followed are given in Sect. 2 and Appendix A. All the methods used in this work are described comprehensively in the Appendix in order to make it easier for the reader to focus on the results and the discussion. The joint dataset is used for a detailed global trend analysis (see Sect. 2 and Appendix B for details about the trend calculations). The long-term tropospheric  $\text{NO}_2$  global patterns and trends are presented in Sect. 3.1. A method that detects trend reversals was developed (see Sect. 2 and Appendix C for details) in order to show that a single linear trend cannot be used efficiently worldwide for such long periods. The method is applied on a global scale, on a country basis and for a number of megacities/large urban agglomerations around the world and the year of the reversal along with the trends for the period before and after the reversals are reported (Sect. 3.2, 3.3 and 3.4). The coincidence of the trend reversals with different socioeconomic changes is also examined. At the end of the paper the main findings and conclusions of this research are summarized.

## 2 Data and methods

### 2.1 Satellite data

In this work, we use tropospheric NO<sub>2</sub> VCD data from the GOME (4/1996-6/2003), SCIAMACHY (8/2002-3/2012), GOME-2A (1/2007-9/2017) and GOME-2B (1/2013-9/2017) TM4NO2A v.2.3 datasets which are available from the Royal Netherlands Meteorological Institute (KNMI). The retrieval scheme consists of three steps. First, the NO<sub>2</sub> slant column density (SCD) is retrieved applying the differential optical absorption spectroscopy (DOAS) method (Platt, 1994), then the stratospheric and tropospheric contribution to the NO<sub>2</sub> SCD is calculated with a data assimilation approach (Dirksen et al., 2011), and finally the tropospheric SCD is converted into tropospheric VCD using a calculated air mass factor (AMF). With DOAS, the reflectance spectrum in the wavelength range from 425-450 nm measured by the sensors is fitted by a model that takes into account absorption cross sections for NO<sub>2</sub>, O<sub>3</sub>, O<sub>2</sub>-O<sub>2</sub>, and H<sub>2</sub>O and the Ring effect while a low-order polynomial accounts for the scattering from aerosols and clouds and for the Rayleigh scattering (Vandaele et al., 2005). The separation between stratospheric and tropospheric SCD is achieved by assimilating the total SCD retrieved with the DOAS into the TM4 chemistry transport model (Dirksen et al., 2011). The AMFs which are used in step 3 for the conversion of the tropospheric SCDs from step 2 into tropospheric VCDs are pre-calculated using the Doubling-Adding KNMI (DAK) radiative transfer model (Stammes, 2001). The retrieval scheme uses satellite-based surface albedo climatological data (Boersma et al., 2004) while cloud fraction and cloud top height is retrieved using the FRESCO algorithm (Koelemeijer et al., 2001). Specifically, the version TM4NO2A v.2.3 dataset used here is the result of a major update that was implemented during the switch from TM4NO2A v.1.1 to TM4NO2A v.2.0 (new altitude-dependent AMF look-up table, a more realistic surface albedo dataset from MERIS sensor onboard ENVISAT satellite, an improved terrain height dataset, and better sampling of TM4 profiles) and the correction of minor retrieval errors thereafter (details in Boersma et al., 2011 and on TEMIS website: [www.temis.nl](http://www.temis.nl), last access: 15 September 2018). Single pixel GOME, SCIAMACHY, GOME-2A and GOME-2B retrievals were attributed to a standard grid of 0.25° x 0.25° and the observations were averaged on a monthly basis. When averaging, the observations were weighted by the size of the overlapping surface defined by the pixel and the corresponding grid cell. Only pixels with a cloud radiance fraction less than 50% were taken into account.

### 2.2 Methodology

In order to produce a self-consistent tropospheric NO<sub>2</sub> VCD monthly gridded dataset from GOME, SCIAMACHY, GOME-2A and GOME-2B we followed a three-step methodology based on the methods of Hilboll et al. (2013) and Geddes et al. (2016). A basic difference with Hilboll et al. (2013) is that we first produced a self-consistent dataset applying all the necessary corrections and then we proceeded to a trend analysis instead of fitting part of the corrections during the trend analysis. In addition, the trend analysis is applied on monthly data instead of annual data like in Geddes et al. (2016). The SCIAMACHY dataset was used as a reference as SCIAMACHY shared common periods of measurements with both GOME

and GOME-2A. This way, we managed to reproduce what SCIAMACHY would measure if the sensor was in orbit for ~21 years (from 4/1996 to 9/2017).

The GOME data were first corrected for the low horizontal resolution they exhibit relative to SCIAMACHY ( $320 \times 40 \text{ km}^2$  vs  $60 \times 30 \text{ km}^2$ ) (step 1) (see also Hilboll et al., 2013). To do so the SCIAMACHY monthly gridded data ( $\text{VCD}_{\text{SC}}$ ) were smoothed in the horizontal dimension in order to match GOME's horizontal resolution. This was achieved by using a boxcar algorithm with an averaging window of  $13 \times 0.25^\circ$  ( $3.25^\circ$ ) in longitudinal direction (Eq. A1) similarly to Geddes et al. (2016). Then climatological monthly values for the full 9-years period (1/2003-12/2011) were calculated from the original and the smoothed SCIAMACHY ( $\text{VCD}_{\text{SCsm}}$ ) dataset on a grid cell basis (Eq. A2). The ratio of the original and the smoothed climatological values is termed as spatial resolution climatological correction factor (CF1: 1 value for each month of the year, a total of 12 values for each grid cell). The annual mean CF1 values for the whole globe as well as for North America, Europe and China can be seen in Fig. S1, S2, S3 and S4, respectively. The original GOME gridded data ( $\text{VCD}_{\text{G}}$ ) were multiplied with the corresponding CF1 values to produce a GOME dataset ( $\text{VCD}_{\text{GC1}}$ ) with apparently higher spatial resolution (see Eq. A3). This method, generally assumes that the relative spatial structure of the central dataset (SCIAMACHY) persists during the GOME and GOME-2 periods.

The different spatial resolution leads to different spatial and temporal sampling by the two instruments which affects the observed  $\text{NO}_2$  levels, the seasonal variability and its amplitude. The spatial resolution correction is expected to correct only part of those biases and hence further corrections had to be applied (Hilboll et al., 2016). The corrected GOME data ( $\text{VCD}_{\text{GC1}}$ ) for the 11-month period 8/2002-6/2003 were compared against SCIAMACHY data for the same period and a shift correction was further applied to account for the instrumental bias between the two sensors (step 2). The shift correction factor (CF2: 1 value for each grid cell) is equal to the difference between the two datasets for the common period and was calculated on a grid cell basis (Eq. A4) similarly to Geddes et al. (2016). The global CF2 patterns as well as the corresponding CF2 values for North America, Europe and China are shown in Fig. S5, S6, S7 and S8, respectively. CF2 was extracted from the spatial resolution corrected GOME data to produce a further corrected GOME dataset ( $\text{VCD}_{\text{GC2}}$ ) (A5).

Finally, the GOME data were brought closer to the SCIAMACHY data by applying a correction for the different seasonal amplitudes that may still exist after the first two corrections (step 3). The normalized seasonal variability (climatological monthly values were extracted from the long-term average) for the whole SCIAMACHY period is divided by the normalized seasonal variability for the whole GOME period. The seasonal amplitude correction factor (CF3: 1 value for each month of the year, a total of 12 values for each grid cell) is equal to the ratio of the SCIAMACHY and GOME normalized seasonal variability (A6). The annual mean CF3 values for the whole globe as well as for North America, Europe and China can be seen in Fig. S9, S10, S11 and S12, respectively. The already twice-corrected GOME data ( $\text{VCD}_{\text{GC2}}$ ) were then multiplied with the CF3 on a monthly basis to produce the final GOME dataset ( $\text{VCD}_{\text{GC3}}$ ) (see Eq. A7). As SCIAMACHY and GOME-2 have a comparable spatial resolution, in the case of GOME-2 data, step 1 was omitted. The GOME-2A and 2B data were averaged on a monthly basis to produce a common GOME-2 dataset which is then corrected following steps 2 and 3.

The self-consistent GOME-SCIAMACHY-GOME-2 timeseries were fitted by using a model with a linear trend and a Fourier-based seasonal component. The method is based on Weatherhead et al. (1998) and has been frequently used in previous studies to calculate the trends of trace gases, aerosols, surface solar radiation, etc. (e.g. van der A et al., 2008; De Smedt et al., 2010; de Meij et al., 2012; Pozzer et al., 2015; Georgoulias et al., 2016; Alexandri et al., 2017) and check whether they are statistically significant at the 95% confidence level (a detailed description of the method is given in Appendix B). Due to systematic lack of valid tropospheric NO<sub>2</sub> retrievals (due to clouds, snow/ice cover, etc.), especially over areas at high latitudes, only trends calculated for timeseries with at least 8 months per year are considered reliable and hence are shown below (see also Pozzer et al., 2015).

In order to detect trend reversals in the self-consistent GOME-SCIAMACHY-GOME-2 timeseries, a method similar to one that was originally suggested in a solar dimming/brightening study was used (Cermak et al., 2010). The method is capable of finding the year when a reversal from positive to negative trends or from negative to positive trends appeared with a very limited error of 0.5-1%. It has to be highlighted that our study, in line with Cermak et al. (2010), focuses on detecting only one major trend reversal and hence minor reversals that may appear in the timeseries are not reported. The method is based on the minimization of a value S which is calculated on an annual basis (a detailed description is given in Appendix C). In this study, a trend reversal is reported only when the trend for the period before or the trend for the period after the reversal year (including the reversal year) is statistically significant at the 95% confidence level.

## 3 Results and Discussion

### 3.1 Long term NO<sub>2</sub> patterns and linear trends

The tropospheric NO<sub>2</sub> VCD patterns from the combined GOME-SCIAMACHY-GOME-2 dataset for the period 4/1996-9/2017 are shown in Fig. 1. It is obvious that the highest NO<sub>2</sub> concentrations are confined over urban, industrialized and highly populated areas. A careful look over oceanic regions reveals local maxima over ship tracks (e.g. Indian Ocean, Mediterranean Sea, Red Sea) highlighting the contribution of ship emissions on the global NO<sub>2</sub> burden. The highest tropospheric NO<sub>2</sub> VCDs appear over an extended area located in eastern China. This area encloses the Beijing-Tianjin-Hebei (BTH) and the Yangtze River Delta (YRD) urban clusters which have experienced an unprecedented population growth and a rapid industrial development over the last two decades (Kourtidis et al., 2015). Some very striking NO<sub>2</sub> hotspots that can be seen on the map (red color) are the Pearl River Delta (PRD) in southern China, Seoul in South Korea, Tokyo in Japan, Tehran in Iran, Moscow in Russia, the Highveld in South Africa, the Po Valley in northern Italy, the area covering the triangle Netherlands-Belgium-Germany, Paris/France, London/U.K., New York/U.S., and other. Despite the fact that NO<sub>2</sub> is transported from one region to another and there is transboundary transport, due to the short NO<sub>2</sub> lifetime (from a few hours up to a day) its concentrations are generally representative of the local NO<sub>2</sub> emission strength.

During the last two decades various changes, that impacted the local NO<sub>2</sub> concentrations, have taken place over different areas around the globe. In Fig. 2, the linear trends of the tropospheric NO<sub>2</sub> VCD are shown in 10<sup>15</sup> molecules cm<sup>-2</sup> yr<sup>-1</sup>. More specifically, in Fig. 2a, all the grid cells are shown, while in Fig. 2b, only grid cells with statistically significant trends at the 95% confidence level and a long term tropospheric NO<sub>2</sub> VCD mean of at least 1 x 10<sup>15</sup> molecules cm<sup>-2</sup> are shown as in Schneider et al. (2011). To exclude the existence of a large systematic bias in the trends a remote region located in the south of the Pacific Ocean [40° S-50° S, 130° W-150° W] with near zero mean tropospheric NO<sub>2</sub> levels ( $\sim -0.02 \pm 0.07 \times 10^{15}$  molecules cm<sup>-2</sup> for the period of interest) was examined. Indeed, a very low negative trend of  $-0.0037 \times 10^{15}$  molecules cm<sup>-2</sup> yr<sup>-1</sup> was found, which is well below SCIAMACHY's precision of  $0.1 \times 10^{15}$  molecules cm<sup>-2</sup> (Hilboll et al., 2013) and can be considered negligible. Taking into account this and following previous studies, the trend values given in the manuscript are rounded to two decimal places except for Table 2 and 3 for intercomparison reasons between the various countries and megacities (see Sect. 3.3 and 3.4).

Strong statistically significant positive trends appear over extended regions in south-eastern Asia (e.g. eastern China, India, Thailand and Indonesia), the Middle East (e.g. Iraq, Iran, Persian Gulf, east coast of Red Sea), eastern Europe (e.g. northern Balkans, Black Sea and the continental areas around it), northern Africa (e.g. regions around the Nile, Morocco and northern Algeria), South Africa (the eastern part of the Highveld Plateau), South America (e.g. the region around Rio in Brazil, central Argentina, the region around Santiago/Chile, northern Colombia and Venezuela), central America (the region of Mexico city). On the contrary, strong statistically significant negative trends appear over the largest part of the U.S. (especially the eastern U.S. and the state of California), western and central Europe, Japan and Taiwan in south-eastern Asia and the region around the Johannesburg-Pretoria conurbation in South Africa. In general, the trend patterns are similar to the ones appearing in previous satellite-based studies for shorter periods (e.g. van der A et al., 2008; Schneider et al., 2012; Hilboll et al., 2013; Krotkov et al., 2016). Concluding, our results confirm that tropospheric NO<sub>2</sub> concentrations have generally decreased during the last ~21 years over the industrialized and highly populated regions of the so-called "Western World" and increased over developing regions. Indicatively, according to the calculated trends, the tropospheric NO<sub>2</sub> levels have decreased on average by ~49% (relative to the fitted mean of the first year) over the U.S., the Netherlands and the U.K., by ~36% over Italy and Japan and by ~32 % yr<sup>-1</sup> over Germany and France during this period and increased over regions like China (an average increase of ~160% with an increase of 200-300% over specific regions of eastern China) or India (~33%).

## 3.2 Trend reversal

As shown in the previous paragraph, the tropospheric NO<sub>2</sub> linear trends during the last two decades appear to be strong and statistically robust over different regions around the world. However, it has been reported in previous studies that the implementation of environmental protection policies (e.g. van der A et al., 2017 for eastern China), economic recession (e.g. Castellanos and Boersma, 2012 for Europe, Vrekoussis et al., 2013 for Greece and Cuevas et al., 2014 for Spain), warfare



(e.g. Lelieveld et al., 2015 for the Middle East) and other events (e.g. Mijling et al., 2009 for the Beijing Olympic Games) may have led to temporal or persistent changes to trace gases (e.g. SO<sub>2</sub> and NO<sub>2</sub>) concentrations. This study mostly focuses on persistent changes which have led to a significant trend reversal of tropospheric NO<sub>2</sub> at some point during the last ~ 21 years. As shown in Fig. 3, trend reversals may indeed be detected over several regions around the globe. Fig. 3a shows the year when a reversal from positive to negative trends started and Fig. 3b shows the year when a reversal from negative to positive trends started. Only grid cells with a statistically significant trend at the 95% confidence level for the period before or after the year of the reversal and a long term tropospheric NO<sub>2</sub> VCD mean of at least  $1 \times 10^{15}$  molecules cm<sup>-2</sup> are shown.

Extended areas over eastern China exhibit a clear reversal from positive to negative trends mostly in 2011 (see Fig. 3a) while the same areas are characterized by strong statistically significant positive trends in Fig. 2b. It becomes more than obvious that by using a linear trend model for the whole period of interest one cannot depict the change in tropospheric NO<sub>2</sub>. A smaller area with a persistent trend reversal from positive to negative in 2012 appears in north-western China. These striking features are in accordance to recent studies focusing on eastern Asia. van der A et al. (2017) showed that NO<sub>x</sub> emissions in eastern China reached a peak in 2012 and slowly decreased thereafter while the economy kept growing. Similar results were recently shown for aerosols (Sogacheva et al., 2018). This situation is attributed to the installation of NO<sub>x</sub> filtering systems at power plants and heavy industry. With the 12<sup>th</sup> five-year plan (ChinaFAQs project, 2012) China set the target to reduce NO<sub>x</sub> emissions by 10% during the period 2010-2015 and seems to have achieved it (de Foy et al., 2016). Selective catalytic reduction (SCR) systems were installed in this period growing from a penetration of about 18% to 86% during the period 2011-2015 (Liu et al., 2016). The use of SCR technologies in power plants is expected to cause a reduction of the emissions by at least 70% (ICAC, 2009). This is the most significant measure taken by the Chinese State and largely coincides with the reversal years appearing in Fig. 3a. In the meantime, China also introduced several new national emission standards for cars switching from China 3 to China 4 standard in 2011 (Wu et., 2017). Stricter regulations were implemented on a city level for on-road vehicles (e.g. Beijing). The approval of the 1<sup>st</sup> national environmental standard for limiting the concentrations of fine particles in the atmosphere by China's State Council accelerated the implementation of various measures after 2012 particularly over the urban clusters of BTH, YRD and PRD (Zhao et al., 2013) which generally exhibit a trend reversal in 2011 in Fig. 3a. The stricter and faster implementation of environmental policies in the capital city of Beijing and other "key regions" might explain the 1-year lag observed in the trend reversal over eastern China (2011) and north-western China (2012) (see Fig. 3a).

Similarly to eastern China large parts of India experienced a reversal from positive to negative trends mostly in 2011. This is possibly due to a combination of a slow-down in Indian economic development, the implementation of cleaner technology, meteorological factors and changes in tropospheric chemistry (see Hilboll et al., 2017). On the contrary, areas in central-southern India experienced a reversal from negative to positive trends during the period 2000-2006. The greater Ballari region which experienced a steel industry growth, especially after 2006, is located there (Hiboll et al., 2017).

Another region with widely-spread positive-to-negative trend reversals is the Iberian Peninsula (see Fig. 3a). Not only the continental areas but also the coastal areas around the Iberian Peninsula (outside and inside the Mediterranean Sea)



experienced this trend reversal mostly during the period 2003-2007. We observe an early trend reversal over the Madrid and Valencia areas in Spain in the period 2000-2002 which is in accordance to NO<sub>2</sub> ground concentration measurements (Cuevas et al., 2014). A reversal with a time lag of few years (2009-2011) is observed over areas in the communities of Extremadura and Catalonia. The observed differences are probably connected to the different economic and political characteristics of each area and the fact that the NO<sub>2</sub> changes are driven by different reasons. The decline of the tropospheric NO<sub>2</sub> levels in the first half of the 2000s when the economy was rising might be attributed to the implementation of environmental measures and the optimization in combustion processes while the decline in NO<sub>2</sub> in late 2000s - early 2010s might be due to the financial recession that started in 2008 (Cuevas et al., 2014). Similar differences are observed over areas in Portugal. For example, the areas around Santarém, on the northeast of Lisbon, exhibit a trend reversal in 2004-2005 while areas around other important cities, such Evora and Coimbra, exhibit a trend reversal in late 2010s - early 2010s.

The Middle East is another region with a persistent positive-to-negative trend reversal. Almost the whole Syria (officially: the Syrian Arab Republic) along with large parts of Iraq experienced a trend reversal during the period 2011-2012 (Fig. 3a) as a consequence of the Syrian civil war which broke out in 2011. Large parts of Iran experienced a similar trend reversal mostly in 2011. This is mostly a result of the extension in 2010 of sanctions which were first imposed by the Nations Security Council in 2006 (Lelieveld et al., 2015), while a direct (less transboundary transport of NO<sub>2</sub> from neighbouring countries) or indirect (political and financial involvement of Iran) effect of the warfare on the observed trend reversal cannot be ruled out. Similarly, oceanic and continental areas around the Persian Gulf experienced a trend reversal in 2011 or earlier. Lelieveld et al. (2015) attributed this to air quality control in the Persian Gulf States from mid-late 2000s onwards. Within the Middle East there are also sporadic areas (e.g. in Iran, in Iraq, areas around the Persian Gulf and areas around the east coast of the Red Sea in Saudi Arabia) with a trend reversal from negative to positive in early 2000s (2000-2003) probably due to changes in power generation, industrial, transport and shipping emissions (Krotkov et al., 2016). A similar trend reversal is observed over the region of Nile River in Egypt (Fig. 3b).

Extended areas with a persistent positive-to-negative trend reversal are also located in central Africa and Mexico (late 2000s) and in the U.S. (early 2000s) (Fig. 3a). On the contrary, areas with a persistent negative-to-positive trend reversal in early 2000s can be seen in South America (highly populated, industrialized areas in Brazil and Argentina) (Fig. 3b). The reversal points coincide with socioeconomic changes that took place in these two countries. Specifically, Argentina experienced a great economic depression during the period 1998-2002. The country's gross domestic product (GDP) declined by ~11% and the industrial production by ~22% in 2002 relative to 2001 (Cline, 2013) while the economy started reviving afterwards. Similarly, Brazil's GDP declined from 1997 to 2002, increased by a factor of ~5 by 2011 and then declined again reaching values close to the 2009 ones in 2016 (World Bank, 2018). However, it has to be highlighted that in 2009 Brazil, and specifically Rio de Janeiro (also known as Rio), won the bid to host the 2016 Olympic Games. This, despite the country's GDP decline, is expected to have given a boost to construction activities in Rio and the other host cities (Sao Paulo, Belo Horizonte, Salvador, Brasília and Manaus) and hence to NO<sub>x</sub> emissions. Indicative is the almost uninterrupted increase of CO<sub>2</sub> emissions from 2002 onwards (World Bank, 2018).

To demonstrate the need for a different approach when looking into long-term linear trends of tropospheric NO<sub>2</sub>, in Fig. 4 we present the timeseries and the trend for the whole period of measurements (4/1996 - 9/2017) and for the period before and after the trend reversal for four different regions of interest around the globe, i.e., eastern China (ECH) [30° N-40° N, 107° E-122° E], Iberian Peninsula (IPE) [36° N-44° N, 10° W-0° W], the Middle East (MEA) [28° N-38° N, 34° E-60° E] and south-eastern America (SAM) [29° S-19° S, 52° W-42° W] (see also embedded maps in Fig. 4). The four regions were selected because they represent areas that experienced a trend reversal in different periods and for different reasons (see Fig. 4 and discussion above). The absolute (in 10<sup>15</sup> molecules cm<sup>-2</sup> yr<sup>-1</sup>) and relative trends (relative to the fitted mean of the period/sub-period first year, in % yr<sup>-1</sup>) for each region are given in Fig. 4 and Table 1.

While ECH exhibits a statistically significant positive trend for the whole period of interest, a clear trend reversal is observed in 2011, with a statistically significant positive trend during the period (4/1996 - 12/2011) and a statistically significant negative trend during the period (1/2011-9/2017) (Fig. 4a, b). Following the discussion above, the observed trend reversal in ECH may be attributed to the implementation of environmental protection policies. In addition, while IPE exhibits a statistically significant negative trend for the whole period (Fig. 4c), a clear trend reversal is observed in 2005 with a statistically significant positive trend during the period (4/1996 - 12/2005) and a statistically significant negative trend during the period (1/2005-9/2017) (Fig. 4d). The 2005 trend reversal in IPE might be attributed to a combination of environmental measures and optimization in combustion processes. Similarly to ECH, MEA exhibits a statistically significant positive trend for the whole period of interest with a clear trend reversal in 2012 (Fig. 4e). A statistically significant positive trend is observed during the period (4/1996 - 12/2012) and a statistically significant negative trend during the period (1/2012-9/2017) (Fig. 4f) which is attributed to the war that takes place in the area since 2011. Finally, SAM exhibits a statistically significant positive trend for the whole period of interest. A clear trend reversal is observed in 2000 with a statistically significant negative trend during the period (4/1996 - 12/2000) and a statistically positive negative trend during the period (1/2000-9/2017). The trend reversal in SAM might be attributed to a revival of the economy after ~2000 in combination with the preparations of the Rio Olympic Games (see discussion above).

### 3.3 Countries

The same analysis was repeated on a country level basis which allows for safer interpretations of the observed trend reversals as the environmental policies, the socioeconomic changes and consequently NO<sub>x</sub> emission changes are unique within each country. As country-level averages are used here there is no discrimination between national hot spots and background areas while transboundary transport cannot be excluded as well. In Fig. 5a, the linear trend of the tropospheric NO<sub>2</sub> VCD (in 10<sup>15</sup> molecules cm<sup>-2</sup> yr<sup>-1</sup>) for the period 4/1996 - 9/2017 is shown for each country. In Fig. 5b, only countries with a statistically significant trend at the 95% confidence level are shown. In line with Fig. 2, the U.S. and Canada in North America, countries in central and western Europe (the U.K., Spain, France, Switzerland, Belgium, the Netherlands, Germany, Denmark, Poland, the Czech Republic, Slovakia, Hungary, Romania, Italy, Slovenia, Croatia), Japan and Taiwan

in south-eastern Asia and several countries in Africa (Libya, Chad, Sudan, Ethiopia, Mali, Guinea, Liberia, Ivory Coast, Ghana, the Democratic Republic of the Congo, Angola, Namibia, Botswana, Zimbabwe, Mozambique, South Africa) exhibit a statistically significant negative trend. On the contrary, statistically significant positive trends can be seen over countries in eastern Europe and the Middle East and over almost the whole Asia and South America.

5 The countries with the highest statistically significant negative trends (deep blue color in Fig. 5: absolute values higher than  $0.1 \times 10^{15}$  molecules  $\text{cm}^{-2} \text{yr}^{-1}$ ) in the world are the Netherlands ( $-0.30 \pm 0.02 \times 10^{15}$  molecules  $\text{cm}^{-2} \text{yr}^{-1}$  /  $-2.33 \pm 0.18 \%$   $\text{yr}^{-1}$ ), Belgium ( $-0.25 \pm 0.03 \times 10^{15}$  molecules  $\text{cm}^{-2} \text{yr}^{-1}$  /  $-1.99 \pm 0.21 \%$   $\text{yr}^{-1}$ ), the U.K. ( $-0.14 \pm 0.01 \times 10^{15}$  molecules  $\text{cm}^{-2} \text{yr}^{-1}$  /  $-2.31 \pm 0.24 \%$   $\text{yr}^{-1}$ ), Taiwan ( $-0.12 \pm 0.01 \times 10^{15}$  molecules  $\text{cm}^{-2} \text{yr}^{-1}$  /  $-1.80 \pm 0.19 \%$   $\text{yr}^{-1}$ ) and Germany ( $-0.11 \pm 0.01 \times 10^{15}$  molecules  $\text{cm}^{-2} \text{yr}^{-1}$  /  $-1.58 \pm 0.21 \%$   $\text{yr}^{-1}$ ) while the countries with the highest statistically significant positive trends (deep red color in Fig. 5: values higher than  $0.1 \times 10^{15}$  molecules  $\text{cm}^{-2} \text{yr}^{-1}$ ) in the world are Swaziland, a sovereign state in southern Africa ( $0.18 \pm 0.04 \times 10^{15}$  molecules  $\text{cm}^{-2} \text{yr}^{-1}$  /  $2.88 \pm 0.64 \%$   $\text{yr}^{-1}$ ), Lebanon ( $0.17 \pm 0.02 \times 10^{15}$  molecules  $\text{cm}^{-2} \text{yr}^{-1}$  /  $5.05 \pm 0.48 \%$   $\text{yr}^{-1}$ ), China ( $0.12 \pm 0.02 \times 10^{15}$  molecules  $\text{cm}^{-2} \text{yr}^{-1}$  /  $7.55 \pm 1.24 \%$   $\text{yr}^{-1}$ ), Bahrain ( $0.10 \pm 0.02 \times 10^{15}$  molecules  $\text{cm}^{-2} \text{yr}^{-1}$  /  $1.66 \pm 0.25 \%$   $\text{yr}^{-1}$ ), Korea ( $0.10 \pm 0.02 \times 10^{15}$  molecules  $\text{cm}^{-2} \text{yr}^{-1}$  /  $1.36 \pm 0.30 \%$   $\text{yr}^{-1}$ ) and Kuwait ( $0.11 \pm 0.01 \times 10^{15}$  molecules  $\text{cm}^{-2} \text{yr}^{-1}$  /  $3.78 \pm 0.27 \%$   $\text{yr}^{-1}$ ). These values along with the absolute (in  $10^{15}$  molecules  $\text{cm}^{-2} \text{yr}^{-1}$ ) and relative trends (relative to the fitted mean of the first year, in  $\% \text{yr}^{-1}$ ) for all the world countries are given in Table S1 of the paper's Supplement.

Table 2 includes the absolute and relative trends only for countries that experienced a trend reversal. In the same Table ~~one may also find~~ the year of trend reversal along with the absolute and relative trends for the period before the trend reversal (including the reversal year) and after the trend reversal (including the reversal year). In addition, Fig. 6a shows the year when a reversal from positive to negative trends was observed and Fig. 6b shows the year when a reversal from negative to positive trends started on a country basis. Only countries with a statistically significant trend at the 95% confidence level for the period before or after the year of the reversal are shown.

In several regions around the world we can see clusters of countries that exhibit a reversal from positive to negative NO<sub>2</sub> trends in the years 2011-2012. For example Kazakhstan, China, North Korea in central-eastern Asia, Australia and Papua New Guinea in Oceania, Pakistan, Afghanistan, Turkmenistan in central Asia, Iran, Iraq, Syria, Jordan, Saudi Arabia, Yemen, Oman in the Middle East and the Arabian Peninsula, Greece, Cyprus, Turkey, Albania, FYROM in the eastern Mediterranean and the Balkan Peninsula, Morocco, Algeria, Tunisia in north-western Africa and Mexico, El Salvador, Honduras in central America. Another cluster of countries that exhibit similar trend reversals but for the years 2009-2010 is located in central Africa (Gabon, Equatorial Guinea, Cameroon, the Central African Republic, the Democratic Republic of the Congo, Tanzania, Malawi, Kenya). There are also other individual countries around the world that exhibit a reversal from positive to negative trends within the period 2009-2012 (e.g. Sweden in Europe, Peru in South America, Sri Lanka in South Asia, etc.) and also countries that exhibit such a trend reversal earlier than this (e.g. Canada and Portugal in 2005, Spain in 2006, Bulgaria in 2007, Ireland in 2008).

On the contrary, we can also see clusters of countries around the world that exhibit a reversal from negative to positive NO<sub>2</sub> trends in the years 2000-2002. For example Mongolia, Russia, Ukraine, Moldova, Georgia, Armenia in Eurasia, Chile, Argentina, Paraguay, Uruguay, Brazil in South America and Thailand, Cambodia, Laos, Vietnam in south-eastern Asia. As discussed in Sect. 3.2, despite the fact that trend reversals appear in the same year over different regions (here countries) the driving reasons may be completely different. Similarly to Fig. 4, Fig. 7 presents the timeseries for the period before and after the trend reversal for eight countries of interest (China, Spain, Ireland, Russia, Argentina, Brazil, Iraq and Syria). These countries were selected according to the results from the global analysis so as to be representative of different driving reasons.

As discussed above the reversal from positive to negative trends over China in 2011 (Fig. 7a) is related to the extended implementation of environmental protection policies while the reversal from positive to negative trends over Spain in 2006 (Fig. 7b) is probably related to a combination of environmental measures and optimization in combustion processes (see Sect. 3.2 and references therein). The reversal from positive to negative trends in Ireland in 2008 (Fig. 7c) coincides with the global financial crisis which is also reflected to the sharp decline of Ireland's GDP during the period 2008-2012 (World Bank, 2018). The annual tropospheric NO<sub>2</sub> VCDs are almost stable after 2012 which is in line with Ireland's Environmental Protection Agency (EPA) report on air pollutant emissions (EPA, 2018). As shown in Fig. 7d, Russia exhibits a trend reversal from negative to positive in 2000. This is apparently connected to the economic boom of the Russian Federation after 1999 as the Russian GDP increased by a factor of 10 during the period 1999-2013 (World Bank, 2018). Similarly to Russia, Argentina and Brazil also exhibit a reversal from negative to positive tropospheric NO<sub>2</sub> trends in 2000 (Fig. 7e and f). As discussed in Sect. 3.2, this reversal point coincides with a revival from the economic recession that both the countries experienced the years around 2000. In the case of Brazil, the preparations for the 2016 Olympic Games may have affected the tropospheric NO<sub>2</sub> levels after 2009 and consequently played a role in the positive trends observed after 2000 (see Sect. 3.2 and references therein). Finally, Iraq and Syria exhibit a trend reversal from positive to negative in 2012 as a consequence the Syrian civil war which broke out in 2011 (see also Sect. 3.2 and references therein) and affected largely the economic and industrial activities in those countries. Indicatively, for Syria, it has been estimated that during the period 2011-2016 the cumulative GDP loss was 226 billion U.S. dollars (four times the Syrian GDP in 2010) (World Bank Group, 2017).

### 3.4 Megacities and large urban agglomerations

The same analysis was repeated for a total of 64 megacities (population of more than 10 million inhabitants) and large urban agglomerations (population of more than ~5 million inhabitants). The list of megacities and large urban agglomerations (hereafter denoted also as population hot spots - PHSs) used here is taken from Schneider et al., (2015). Such areas are characterized by extensive human activities (transportation, industry, domestic heating, etc.). Hence, trace gas emissions are expected to be more sensitive to socioeconomic changes and trend reversals are expected to be sharper. In Fig. 8 the linear

trend of the tropospheric NO<sub>2</sub> VCD (in 10<sup>15</sup> molecules cm<sup>-2</sup> yr<sup>-1</sup>) for the period 4/1996 - 9/2017 is shown for 64 PHSs out of a total of 66 PHSs appearing in Schneider et al. (2015) list as only trends calculated for timeseries with at least 8 months per year are reported. Statistically significant trends at the 95% confidence level are marked with a black outline.

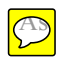

shown in Fig.8, the majority of the PHSs with the highest statistically significant negative trends are located in Europe and the U.S. while the PHSs with the highest statistically significant positive trends are mostly confined in south-eastern Asia (e.g. China, India), the Middle East - Arabian Peninsula and South America. More specifically, the PHSs with the highest statistically significant negative trends (deep blue color in Fig. 8: absolute values higher than 0.4 x 10<sup>15</sup> molecules cm<sup>-2</sup> yr<sup>-1</sup>) in the world are Los Angeles (-1.34±0.11 x 10<sup>15</sup> molecules cm<sup>-2</sup> yr<sup>-1</sup> / -3.07±0.24 % yr<sup>-1</sup>), New York (-0.70±0.09 x 10<sup>15</sup> molecules cm<sup>-2</sup> yr<sup>-1</sup> / -2.28±0.29 % yr<sup>-1</sup>), Boston (-0.60±0.07 x 10<sup>15</sup> molecules cm<sup>-2</sup> yr<sup>-1</sup> / -3.50±0.43 % yr<sup>-1</sup>), Po Valley (-0.54±0.07 x 10<sup>15</sup> molecules cm<sup>-2</sup> yr<sup>-1</sup> / -2.23±0.30 % yr<sup>-1</sup>), Chicago (-0.50±0.05 x 10<sup>15</sup> molecules cm<sup>-2</sup> yr<sup>-1</sup> / -2.52±0.27 % yr<sup>-1</sup>) and Philadelphia (-0.46±0.08 x 10<sup>15</sup> molecules cm<sup>-2</sup> yr<sup>-1</sup> / -2.32±0.42 % yr<sup>-1</sup>). On the contrary the PHSs with the highest statistically significant positive trends (deep red color in Fig. 8: values higher than 0.4 x 10<sup>15</sup> molecules cm<sup>-2</sup> yr<sup>-1</sup>) are Tianjin (1.78±0.17 x 10<sup>15</sup> molecules cm<sup>-2</sup> yr<sup>-1</sup> / 14.88±1.42 % yr<sup>-1</sup>), Beijing (1.36±0.18 x 10<sup>15</sup> molecules cm<sup>-2</sup> yr<sup>-1</sup> / 6.38±0.86 % yr<sup>-1</sup>), Shenyang (0.91±0.08 x 10<sup>15</sup> molecules cm<sup>-2</sup> yr<sup>-1</sup> / 16.26±1.42 % yr<sup>-1</sup>), Chongqing (0.86±0.14 x 10<sup>15</sup> molecules cm<sup>-2</sup> yr<sup>-1</sup> / 28.11±4.66 % yr<sup>-1</sup>), Tehran (0.81±0.06 x 10<sup>15</sup> molecules cm<sup>-2</sup> yr<sup>-1</sup> / 8.58±0.58 % yr<sup>-1</sup>), Chengdu (0.72±0.08 x 10<sup>15</sup> molecules cm<sup>-2</sup> yr<sup>-1</sup> / 11.66±1.33 % yr<sup>-1</sup>), Shanghai (0.59±0.09 x 10<sup>15</sup> molecules cm<sup>-2</sup> yr<sup>-1</sup> / 2.74±0.42 % yr<sup>-1</sup>), Wuhan (0.57±0.05 x 10<sup>15</sup> molecules cm<sup>-2</sup> yr<sup>-1</sup> / 7.05±0.67 % yr<sup>-1</sup>) and Baghdad (0.42±0.02 x 10<sup>15</sup> molecules cm<sup>-2</sup> yr<sup>-1</sup> / 16.95±0.79 % yr<sup>-1</sup>). These values along with the trends for all the PHSs examined in this work can be found in Table 3.

29 out of the 64 examined PHSs exhibit a trend reversal within the period of interest. Fig. 9a shows the year when a reversal from positive to negative trends started (Athens, Bangalore, Bangkok, Buenos Aires, Jakarta, Jeddah, Johannesburg, Khartoum, Kinshasa, Lahore, Manila, Rio de Janeiro, Santiago) and Fig. 9b shows the year when a reversal from positive to negative trends started (Atlanta, Beijing, Boston, Chongqing, Damascus, Hong Kong, Los Angeles, Osaka, San Francisco, Shanghai, Shenyang, Shenzhen, Taipei, Tianjin, Tokyo, Wuhan). Only PHSs with a statistically significant trend at the 95% confidence level for the period before or after the year of the reversal are shown. The year of trend reversal along with the absolute and relative trends for the period before the trend reversal (including the reversal year) and after the trend reversal (including the reversal year) are given in Table 3.

On top of the discussions above, timeseries for the period before and after the trend reversal for six selected PHSs are presented in Fig. 10. Beijing, the capital of China, exhibits a sharp reversal from positive to negative (statistically insignificant) trends in 2011 as a result of emission control policies (see discussion in Sect. 3.2 and 3.3). Similarly, Los Angeles exhibits a sharp reversal from positive to negative trends in 2000 probably due the combined effect of efficient emission control measures in California, especially after late 1990s - early 2000s, and economic activity slowdown following the 2008 global financial crisis (Russell et al., 2012; Hilboll et al., 2013; Lurmann et al., 2015). A reversal from negative to positive trends is observed in 2002 in Buenos Aires (capital city, financial, industrial and commercial center of Argentina) which coincides with the period that the country started recovering from the great economic depression of 1998-2002 (see

also Sect. 3.2 and 3.3). Rio de Janeiro exhibits a sharp reversal from negative to positive trends in 2006, a bit later than the whole Brazil (trend reversal in 2000). The trend reversal coincides with the revival of Brazil's economy and with the preparations for the 2014 Football World Cup and the 2016 Olympic Games (see also Sect. 3.2 and 3.3). Athens, the capital city and financial center of Greece, where half the country's population lives, exhibits a reversal from negative to positive (statistically insignificant) trends in 2010. Vrekoussis et al. (2013) reported a 30-40% decrease of tropospheric NO<sub>2</sub> in Athens during the period 2008-2012 as a result of the unprecedented economic crisis that the country experienced from 2008 onwards. Our results suggest that there may be a stabilization of the tropospheric NO<sub>2</sub> levels after the rapid decline that was observed in the first years of the crisis. Finally, Damascus, the capital city and financial/industrial center of Syria, exhibits a sharp reversal from positive to negative trends in 2012 as a result of the Syrian civil war which broke out in 2011 (see Sect. 3.2 and 3.3 and references therein).

## 4. Conclusions

In this work, a self-consistent GOME, SCIAMACHY and GOME-2 tropospheric NO<sub>2</sub> VCD dataset is compiled for the period 4/1996-9/2017. The GOME and GOME-2A/GOME-2B data are "corrected" relative to the SCIAMACHY data, following a three-step procedure, in order to reproduce what SCIAMACHY would measure if being in orbit for the whole period of interest. The dataset is then used to study the long-term global tropospheric NO<sub>2</sub> patterns and trends and search for possible trend reversals during this ~21-years period. The main findings of the present study are summarized in the following:

- The highest tropospheric NO<sub>2</sub> concentrations are seen over urban, industrialized and highly populated areas and over ship tracks in the oceans. Tropospheric NO<sub>2</sub> has generally decreased during the last two decades over the industrialized and highly populated regions of the Western World and increased over developing regions. Statistically significant negative trends appear over the largest part of the U.S., western and central Europe, Japan and Taiwan in south-eastern Asia and the region around the Johannesburg-Pretoria conurbation in South Africa. Strong statistically significant positive trends appear over regions in south-eastern Asia, the Middle East, eastern Europe, northern Africa, South Africa, and South and Central America. Indicatively, during the last ~21years, the tropospheric NO<sub>2</sub> levels have decreased on average by ~49% relative to the fitted mean of the first year over the U.S., the Netherlands and the U.K., by ~36% over Italy and Japan and by ~32% over Germany and France, while, they increased over regions like China (an average increase of ~160% with an increase of 200-300% over the eastern part of the country) or India (~33%).
- The application of a trend reversal detection method on a global scale revealed that extended areas over eastern China exhibit a clear reversal from positive to negative trends, mostly in 2011, while a smaller area in north-western China exhibits a reversal from positive to negative trends in 2012. Similarly to eastern China, large parts of India experienced a reversal



from positive to negative trends, mostly in 2011, while areas in central-southern India experienced a reversal from negative to positive trends during the first half of 2000s. Other regions with widely-spread positive-to-negative trend reversals are the Iberian Peninsula (mostly during the first half of 2000s) and the Middle East (2011-2012), despite the fact that within the Middle East there are sporadic areas with a trend reversal from negative to positive in early 2000s. A similar negative-to-positive trend reversal is observed over the region of Nile River in Egypt. Extended areas with a persistent positive-to-negative trend reversal are also seen in central Africa and Mexico (late 2000s) and in the U.S. (early 2000s) while areas with a persistent negative-to-positive trend reversal in early 2000s can be seen in South America, mostly in Brazil and Argentina.

- A country-level analysis showed clusters of countries that exhibit a reversal from positive to negative NO<sub>2</sub> trends in the years 2011-2012 in central-eastern Asia (Kazakhstan, China, North Korea), Oceania (Australia, Papua New Guinea), central Asia (Pakistan, Afghanistan and Turkmenistan), the Middle East and the Arabian Peninsula (Iran, Iraq, Syria, Jordan, Saudi Arabia, Yemen, Oman), the eastern Mediterranean and the Balkan Peninsula (Greece, Cyprus, Turkey, Albania, FYROM), north-western Africa (Morocco, Algeria, Tunisia) and central America (Mexico, El Salvador, Honduras). Another cluster of countries that exhibit similar trend reversals but for the years 2009-2010 is located in central Africa (Gabon, Equatorial Guinea, Cameroon, the Central African Republic, the Democratic Republic of the Congo, Tanzania, Malawi, Kenya). There are also individual countries around the world that exhibit a reversal from positive to negative trends within the period 2009-2012 (e.g. Sweden, Peru and Sri Lanka) and countries that exhibit such a trend reversal earlier than this (Canada and Portugal in 2005, Spain in 2006, Bulgaria in 2007, Ireland in 2008). On the contrary, we can see clusters of countries around the world that exhibit a reversal from negative to positive NO<sub>2</sub> trends in the years 2000-2002 in Eurasia (Mongolia, Russia, Ukraine, Moldova, Georgia, Armenia), South America (Chile, Argentina, Paraguay, Uruguay, Brazil) and south-eastern Asia (Thailand, Cambodia, Laos, Vietnam).

- The application of the trend reversal detection method on 64 megacities and large urban agglomerations revealed that 29 of them exhibit a tropospheric NO<sub>2</sub> trend reversal. A reversal from negative to positive trends was observed for Athens/Greece, Bangalore/India, Bangkok/Thailand, Buenos Aires/Argentina, Jakarta/Indonesia, Jeddah/Saudi Arabia, Johannesburg/South Africa, Khartoum/Sudan, Kinshasa/Democratic Republic of the Congo, Lahore/Pakistan, Manila/Philippines, Rio de Janeiro/Brazil and Santiago/Chile, while a reversal from positive to negative trends was observed for Atlanta/U.S., Beijing/China, Boston/U.S., Chongqing/China, Damascus/Syria, Hong Kong, Los Angeles/U.S., Osaka/Japan, San Francisco/U.S., Shanghai/China, Shenyang/China, Shenzhen/China, Taipei/Taiwan, Tianjin/China, Tokyo/Japan and Wuhan/China.

- It is shown that the observed tropospheric NO<sub>2</sub> trend reversals over different areas, countries and megacities/large urban agglomerations could be associated with various socioeconomic changes (environmental policies, economic recession, warfare, etc.) that possibly had a direct impact on NO<sub>x</sub> emissions. For example, the reversal from positive to negative trends



in 2011-2012 over extended areas in China (including Beijing and other megacities) can attributed to the efficient implementation of environmental protection policies. The reversal from positive to negative trends over Spain in 2006 might be attributed to a combination of environmental measures and optimization in combustion processes, while the reversal from positive to negative trends in Ireland in 2008 coincides with the bursting of the global financial crisis. Russia's reversal from negative to positive trends in 2000 might be connected to the economic boom of the country after 1999. Similarly, Argentina's and Brazil's reversal from negative to positive trends in 2000 coincides with a revival from the economic recession that both the countries experienced the years around 2000. The megacities Buenos Aires in Argentina and Rio de Janeiro in Brazil exhibit a similar trend reversal a bit later than the corresponding countries. In the case of Brazil, the preparations for the 2016 Olympic Games might have affected the tropospheric NO<sub>2</sub> levels after 2009 and consequently played a role in the positive trends observed after 2000. Iraq and Syria (including Damascus) exhibit a trend reversal from positive to negative in 2012 which is profoundly due to the Syrian civil war which broke out in 2011 and affected largely the economic and industrial activities. Athens/Greece exhibits a reversal from negative to positive (statistically insignificant) trends in 2010 pointing towards a stabilization of tropospheric NO<sub>2</sub> after the rapid decline that was observed during the first years of the Greek economic crisis. Finally, a positive-to-negative trend reversal is seen in Los Angeles/U.S. in 2000 which might be attributed to the combined effect of efficient emission control measures in California, especially after late 1990s - early 2000s, and economic activity slowdown following the 2008 global financial crisis.

The next years, tropospheric NO<sub>2</sub> timeseries will be extended from new more sophisticated satellite sensors such as the recently launched Tropospheric Monitoring Instrument (TROPOMI) onboard ESA's Sentinel - 5 Precursor (S-5P) satellite (Veefkind et al., 2012). Hence, the need to develop similar methods in the future that will be able to incorporate both morning and afternoon measurements (e.g. from OMI and TROPOMI) and detect more than one trend reversal points in improved tropospheric NO<sub>2</sub> products (e.g. QA4ECV v.1.1, Zara et al., 2018 and references therein) is acknowledged.

## Appendix A: Merging GOME, SCIAMACHY and GOME-2 observations

**Step 1:** VCD<sub>SCsm</sub> is calculated from VCD<sub>SC</sub> using a boxcar algorithm with an averaging window of 13 x 0.25° (3.25°)

$$\text{VCD}_{\text{SCsm}}(x, y, t) = \frac{1}{13} \left( \sum_{w=-6}^6 (\text{VCD}_{\text{SC}}(x + w \times 0.25, y, t)) \right) \quad (\text{A1})$$

where x and y are the central longitude and latitude of a grid cell in degrees and t is the time in one month steps (from 1/2003 to 12/2011), ..., while w=-6, -5, ..., 0, 5, 6 (a total of 13 values).

$$CF1(x, y, m) = VCD_{SC}(x, y, m) / VCD_{SCsm}(x, y, m) \quad (A2)$$

where  $m=1, 2, \dots, 12$  is the month for which the climatological monthly values  $VCD_{SC}(x,y,m)$  and  $VCD_{SCsm}(x,y,m)$  are calculated.

5

$$VCD_{GC1}(x, y, t) = VCD_G(x, y, t) \times CF1(x, y, m) \quad (A3)$$

$$\text{Step 2: } CF2(x, y) = \frac{1}{n} \left( \sum_{t=t_1}^{t_2} (VCD_{GC1}(x, y, t)) - \sum_{t=t_1}^{t_2} (VCD_{SC}(x, y, t)) \right) \quad (A4)$$

10 where  $t$  is the time in one month steps for the common GOME-SCIAMACHY period ( $t_1$ : 8/2002 to  $t_2$ : 6/2003) of  $n=11$  months.

$$VCD_{GC2}(x, y, t) = VCD_{GC1}(x, y, t) - CF2(x, y) \quad (A5)$$

$$\begin{aligned} \text{Step 3: } CF3(x, y, m) = & \left[ VCD_{SC}(x, y, m) / \frac{1}{n_{SC}} \left( \sum_{t=t_{SC1}}^{t_{SC2}} (VCD_{SC}(x, y, t)) \right) \right] / \\ & \left[ VCD_{GC2}(x, y, m) / \frac{1}{n_G} \left( \sum_{t=t_{G1}}^{t_{G2}} (VCD_{GC2}(x, y, t)) \right) \right] \end{aligned} \quad (A6)$$

where  $t$  is the time in one month steps for the whole SCIAMACHY period ( $t_{SC1}$ : 8/2002 to  $t_{SC2}$ : 3/2012) of  $n_{SC}=116$  months and for the whole GOME period ( $t_{G1}$ : 4/1996 to  $t_{G2}$ : 6/2003) of  $n_G=87$  months.

$$20 \quad VCD_{GC3}(x, y, t) = VCD_{GC2}(x, y, t) \times CF3(x, y, m) \quad (A7)$$

## Appendix B: Trend analysis

The timeseries are fitted by using a model with a linear trend and a Fourier-based seasonal component:

$$Y_t = A + BX_t + \sum_{n=1}^6 [a_n \sin(\frac{2\pi}{T}nX_t) + b_n \cos(\frac{2\pi}{T}nX_t)] + N_t \quad (B1)$$

where  $Y_t$  is the monthly mean value for month  $t$ ,  $X_t$  is the number of the month after the first month of the timeseries,  $A$  is the monthly mean of the first month of the timeseries and  $B$  is the trend. The seasonal component contains the amplitudes  $a_n$  and  $b_n$ ,  $T$  is the period and  $N_t$  is the difference between the modeled and the measured value termed, usually as remainder.

$$N_t = \phi N_{t-1} + \varepsilon_t \quad (B2)$$

where  $\phi$  is the autocorrelation in the remainder and  $\varepsilon_t$  is the white noise. Autocorrelation  $\phi$  affects the precision of the trend  $\sigma_B$  which is given as a function of  $\phi$ , the length of the data set in months  $m$  and the variance  $\sigma_N$  of the remainder for small autocorrelations:

$$\sigma_B \approx \left[ \frac{\sigma_N}{m^{3/2}} \sqrt{\frac{1+\phi}{1-\phi}} \right] \quad (B3)$$

The calculated trend  $B$  is considered to be statistically significant at the 95% confidence level if  $|B/\sigma_B| > 2$ .

## Appendix C: Trend reversal detection

The trend reversal method is based on the minimization of a value  $S(t)$  which is calculated for each year  $t$  of the period  $[t_1=2000, t_n=2012]$ :

$$S(t) = \frac{\min(p(B_l), p(B_r))}{\text{abs}(B_l - B_r) \times \sigma_{B_{l+r}}} \quad (C1)$$

where  $p(B_l)$  and  $p(B_r)$  express the possibility that the trends  $B_l$  and  $B_r$  for the short periods on the left  $[t-4, t]$  and on the right  $[t, t+4]$  of the year  $t$  are statistically insignificant and  $\sigma_{B_{l+r}}$  is the standard error of the trend for the combined sub-periods  $[t-4, t+4]$ . The year  $t_r$  when  $S$  takes its lower value and there is a switch from a positive trend to a negative one or from a negative trend to a positive one is considered to be a potential trend reversal year. The trends are calculated using ordinary least-squares linear regression with 95% confidence intervals. In this study, only when the trend  $B_b$  for the whole period before  $t_r$  (including  $t_r$ )  $[t_1, t_r]$  or the trend  $B_a$  for the whole period after  $t_r$  (including  $t_r$ )  $[t_r, t_n]$  is statistically significant at the 95% confidence level, a trend reversal is reported. Specifically, for the four extended regions of interest, the country and the

megacities and large urban agglomeration analyses performed in this paper, the  $B_b$  and  $B_a$  trends are calculated from the monthly timeseries using the method presented in Appendix B in order to be consistent with the trends for the whole time period (4/1996 - 9/2017) which are reported in the paper.

## Acknowledgements

- 5 This research has been implemented within the framework of the SCIAvisie project funded by the Netherlands Space Organization (NSO).

## References

- Alexandri, G., Georgoulas, A. K., Meleti, C., Balis, D., Kourtidis, K. A., Sanchez-Lorenzo, A., Trentmann, J., and Zanis, P.: A high resolution satellite view of surface solar radiation over the climatically sensitive region of Eastern Mediterranean, Atmos. Res., 188, 107-121, doi:10.1016/j.atmosres.2016.12.015, 2017.
- 10 Basset, M. and Seinfeld, J. H.: Atmospheric Equilibrium Model of Sulfate and Nitrate Aerosols, Atmos. Environ., 17, 2237-2252, 1983.
- Beirle, S., Platt, U., Wenig, M., and Wagner, T.: Highly resolved global distribution of tropospheric  $\text{NO}_2$  using GOME narrow swath mode data, Atmos. Chem. Phys., 4, 1913-1924, doi:10.5194/acp-4-1913-2004, 2004.
- 15 Boersma, K. F., Eskes, H. J., and Brinksma, E. J.: Error analysis for tropospheric  $\text{NO}_2$  retrieval from space, J. Geophys. Res., 109, D04311, doi:10.1029/2003JD003962, 2004.
- Boersma, K. F., Jacob, D. J., Eskes, H. J., Pinder, R. W., and Wang, J.: Intercomparison of SCIAMACHY and OMI tropospheric  $\text{NO}_2$  columns: Observing the diurnal evolution of chemistry and emissions from space, J. Geophys. Res., 113, D16S26, doi:10.1029/2007JD008816, 2008.
- 20 Boersma, K. F., Eskes, H. J., Dirksen, R. J., van der A, R. J., Veefkind, J. P., Stammes, P., Huijnen, V., Kleipool, Q. L., Sneep, M., Claas, J., Leitão, J., Richter, A., Zhou, Y., and Brunner, D.: An improved tropospheric  $\text{NO}_2$  column retrieval algorithm for the Ozone Monitoring Instrument, Atmos. Meas. Tech., 4, 1905-1928, doi:10.5194/amt-4-1905-2011, 2011.
- Bovensmann, H., Burrows, J. P., Buchwitz, M., Frerick, F., Nöel, S., and Rozanov, V. V.: SCIAMACHY: mission objectives and measurement modes, J. Atmos. Sci., 56, 127-150, doi:10.1175/1520-0469(1999)056<0127:SMOAMM>2.0.CO;2, 25 1999.
- Burrows, J. P., Hölzle, E., Goede, A., Visser, H., and Fricke, W.: SCIAMACHY - scanning imaging absorption spectrometer for atmospheric chartography, Acta Astronaut., 35, 445-451, doi:10.1016/0094-5765(94)00278-T, 1995.
- Burrows, J. P., Weber, M., Buchwitz, M., Rozanov, V. V., Ladstätter-Weissenmayer, A., Richter, A., DeBeek, R., Hoogen, R., Bramstedt, K., Eichmann, K.-U., and Eisinger, M.: The Global Ozone Monitoring Experiment (GOME): mission

- concept and first scientific results, *J. Atmos. Sci.*, 56, 151–175, doi:10.1175/1520-0469(1999)056<0151:TGOMEG>2.0.CO;2, 1999.
- Callies, J., Corpaccioli, E., Eisinger, M., Hahne, A., and Lefebvre, A.: GOME-2 - Metop's second-generation sensor for operational ozone monitoring, *ESA Bull.-Eur. Space*, 102, 28-36, 2000.
- 5 Castellanos, P. and Boersma, K. F.: Reductions in nitrogen oxides over Europe driven by environmental policy and economic recession, *Sci. Rep.*, 2, 265, doi:10.1038/srep00265, 2012.
- Cermak, J., Wild, M., Knutti, R., Mishchenko, M. I., and Heidinger, A. K.: Consistency of global satellite-derived aerosol and cloud data sets with recent brightening observations, *Geophys. Res. Lett.*, 37, L21704, doi:10.1029/2010GL044632, 2010.
- 10 ChinaFAQs Project: China Adopts World-Class Pollutant Emissions Standards for Coal Power Plants, available at: <http://www.chinafaqs.org/library/chinafaqs-china-adopts-world-class-pollutant-emissions-standards-coal-power-plants> (last access: 15 September 2018), 2012.
- Cline, W. R.: Restoring economic growth in Argentina (English), Working paper; no. 9 / 03, Washington, DC: World Bank, available at: <http://documents.worldbank.org/curated/en/805501468769277647/Restoring-economic-growth-in-Argentina> 15 (last access: 15 September 2018), 2003.
- Cuevas, C. A., Notario, A., Adame, J. A., Hilboll, A., Richter, A., Burrows, J. P., and Saiz-Lopez, A.: Evolution of NO<sub>2</sub> levels in Spain from 1996 to 2012, *Sci. Rep.*, 4, 5887, doi:10.1038/srep05887, 2014.
- de Foy, B., Lu, Z., and Streets, D. G.: Satellite NO<sub>2</sub> retrievals suggest China has exceeded its NO<sub>x</sub> reduction goals from the twelfth Five-Year Plan, *Scientific Reports*, 6, 35912, doi:10.1038/srep35912, 2016.
- 20 de Meij, A., Pozzer, A., and Lelieveld, J.: Trend analysis in aerosol optical depths and pollutant emission estimates between 2000 and 2009, *Atmos. Environ.*, 51, 75-85, doi:10.1016/j.atmosenv.2012.01.059, 2012.
- De Smedt, I., Stavrou, T., Muller, J.-F., van der A, R. J., and Van Roozendael, M.: Trend detection in satellite observations of formaldehyde tropospheric columns, *Geophys. Res. Lett.*, 37, L18808, doi:10.1029/2010GL044245, 2010.
- Dirksen, R. J., Boersma, K. F., Eskes, H. J., Ionov, D. V., Bucsela, E. J., Levelt, P. F., and Kelder, H. M.: Evaluation of 25 stratospheric NO<sub>2</sub> retrieved from the Ozone Monitoring Instrument: intercomparison, diurnal cycle and trending, *J. Geophys. Res.*, 116, D08305, doi:10.1029/2010JD014943, 2011.
- EPA: Ireland's Air Pollutant Emissions 2016, available at: <http://www.epa.ie/pubs/reports/air/airemissions/irelandsairpollutantemissions2016.html> (last access: 15 September 2018), 2018.
- Geddes, J. A., Martin, R. V., Boys, B. L., and van Donkelaar, A.: Long-term trends worldwide in ambient NO<sub>2</sub> 30 concentrations inferred from satellite observations, *Environ. Health Perspect.*, 124, 281-289, doi:10.1289/ehp.1409567, 2016.
- Georgoulas, A. K., Alexandri, G., Kourtidis, K. A., Lelieveld, J., Zanis, P., and Amiridis, V.: Differences between the MODIS Collection 6 and 5.1 aerosol datasets over the greater Mediterranean region, *Atmos. Environ.*, 147, 310-319, doi:10.1016/j.atmosenv.2016.10.014, 2016.

- Hilboll, A., Richter, A., and Burrows, J. P.: Long-term changes of tropospheric NO<sub>2</sub> over megacities derived from multiple satellite instruments, *Atmos. Chem. Phys.*, 13, 4145-4169, doi:10.5194/acp-13-4145-2013, 2013.
- Hilboll, A., Richter, A., and Burrows, J. P.: NO<sub>2</sub> pollution over India observed from space - the impact of rapid economic growth, and a recent decline, *Atmos. Chem. Phys. Discuss.*, doi:10.5194/acp-2017-101, in review, 2017.
- 5 ICAC: Institute of Clean Air Companies, Selective Catalytic Reduction (SCR) control of NO<sub>x</sub> emissions from fossil fuel-fired electric power plants, available at: [https://c.ymcdn.com/sites/icac.site-ym.com/resource/resmgr/Standards\\_WhitePapers/SCR\\_WhitePaper\\_final\\_2009.pdf](https://c.ymcdn.com/sites/icac.site-ym.com/resource/resmgr/Standards_WhitePapers/SCR_WhitePaper_final_2009.pdf) (last access: 15 September 2018), 2009.
- Isaksen, I. S. A., Berntsen, T. K., Dalsøren, S. B., Eleftheratos, K., Orsolini, Y., Rognerud, B., Stordal, F., Søvde, O. A., Zerefos, C., Holmes, C. D.: Atmospheric Ozone and Methane in a Changing Climate, *Atmosphere*, 5(3), 518-535, doi:10.3390/atmos5030518.
- 10 Koelemeijer, R. B. A., Stammes, P., Hovenier, J. W., and de Haan, J. F.: A fast method for retrieval of cloud parameters using oxygen A band measurements from the Global Ozone Monitoring Experiment, *J. Geophys. Res.*, 106, 3475-3490, doi:10.1029/2000JD900657, 2001.
- Konovalov, I. B., Beekmann, M., Richter, A., and Burrows, J. P.: Inverse modelling of the spatial distribution of NO<sub>x</sub> emissions on a continental scale using satellite data, *Atmos. Chem. Phys.*, 6, 1747-1770, doi:10.5194/acp-6-1747-2006, 2006.
- 15 Konovalov, I. B., Beekmann, M., Burrows, J. P., and Richter, A.: Satellite measurement based estimates of decadal changes in European nitrogen oxides emissions, *Atmos. Chem. Phys.*, 8, 2623-2641, doi:10.5194/acp-8-2623-2008, 2008.
- Konovalov, I. B., Beekmann, M., Richter, A., Burrows, J. P., and Hilboll, A.: Multi-annual changes of NO<sub>x</sub> emissions in megacity regions: nonlinear trend analysis of satellite measurement based estimates, *Atmos. Chem. Phys.*, 10, 8481-8498, doi:10.5194/acp-10-8481-2010, 2010.
- 20 Kourtidis, K., Stathopoulos, S., Georgoulas, A. K., Alexandri, G., and Rapsomanikis, S.: A study of the impact of synoptic weather conditions and water vapor on aerosol-cloud relationships over major urban clusters of China, *Atmos. Chem. Phys.*, 15, 10955-10964, doi:10.5194/acp-15-10955-2015, 2015.
- 25 Krotkov, N. A., McLinden, C. A., Li, C., Lamsal, L. N., Celarier, E. A., Marchenko, S. V., Swartz, W. H., Bucsela, E. J., Joiner, J., Duncan, B. N., Boersma, K. F., Veefkind, J. P., Levelt, P. F., Fioletov, V. E., Dickerson, R. R., He, H., Lu, Z., and Streets, D. G.: Aura OMI observations of regional SO<sub>2</sub> and NO<sub>2</sub> pollution changes from 2005 to 2015, *Atmos. Chem. Phys.*, 16, 4605-4629, doi:10.5194/acp-16-4605-2016, 2016.
- Lelieveld, J., Beirle, S., Hörmann, C., Stenchikov, G., and Wagner, T.: Abrupt recent trend changes in atmospheric nitrogen dioxide over the Middle East, *Sci. Adv.*, 1, 2-6, doi:10.1126/sciadv.1500498, 2015.
- 30 Levelt, P. F., van den Oord, G. H. J., Dobber, M. R., Mälkki, A., Visser, H., de Vries, J., Stammes, P., Lundell, J., and Saari, H.: The Ozone Monitoring Instrument, *IEEE T. Geosci. Remote*, 44, 1093-1101, doi:10.1109/TGRS.2006.872333, 2006.

- Liu, F., Zhang, Q., Ronald, J. van der A., Zheng, B., Tong, D., Yan, L., Zheng, Y., and He, K.: Recent reduction in NO<sub>x</sub> emissions over China: synthesis of satellite observations and emission inventories, *Environ. Res. Lett.*, 11, 114002, doi:10.1088/1748-9326/11/11/114002, 2016.
- Lurmann, F., Avol, E., and Gilliland, F.: Emissions reduction policies and recent trends in Southern California's ambient air quality, *J. Air Waste Manag. Assoc.*, 65(3), 324-335, doi:10.1080/10962247.2014.991856, 2015.
- Mijling, B., van der A, R. J., Boersma, K. F., Van Roozendael, M., De Smedt, I., and Kelder, H. M.: Reductions in NO<sub>2</sub> detected from space during the 2008 Beijing Olympic Games, *Geophys. Res. Lett.*, 36, L13801, doi:10.1029/2009GL038943, 2009.
- Platt, U.: Differential optical absorption spectroscopy (DOAS), in: *Air Monitoring by Spectroscopic Techniques*, edited by: Sigrist, M. W., Vol. 127, John Wiley & Sons, Hoboken, N.J., USA, 27-83, 1994.
- Pozzer, A., de Meij, A., Yoon, J., Tost, H., Georgoulias, A. K., and Astitha, M.: AOD trends during 2001–2010 from observations and model simulations, *Atmos. Chem. Phys.*, 15, 5521-5535, doi:10.5194/acp-15-5521-2015, 2015.
- Russell, A. R., Valin, L. C., and Cohen, R. C.: Trends in OMI NO<sub>2</sub> observations over the United States: effects of emission control technology and the economic recession, *Atmos. Chem. Phys.*, 12, 12197-12209, doi:10.5194/acp-12-12197-2012, 2012.
- Schneider, P. and van der A, R. J.: A global single-sensor analysis of 2002-2011 tropospheric nitrogen dioxide trends observed from space, *J. Geophys. Res.*, 117, 1-17, doi:10.1029/2012JD017571, 2012.
- Schneider, P., Lahoz, W. A., and van der A, R.: Recent satellite-based trends of tropospheric nitrogen dioxide over large urban agglomerations worldwide, *Atmos. Chem. Phys.*, 15, 1205-1220, doi:10.5194/acp-15-1205-2015, 2015.
- Seinfeld, J. H. and Pandis, S. N.: *Atmospheric chemistry and physics: from air pollution to climate change*, Wiley, New Jersey, USA, 2016.
- Sogacheva, L., Rodriguez, E., Kolmonen, P., Virtanen, T. H., Saponaro, G., de Leeuw, G., Georgoulias, A. K., Alexandri, G., Kourtidis, K., and van der A, R. J.: Spatial and seasonal variations of aerosols over China from two decades of multi-satellite observations. Part II: AOD time series for 1995–2017 combined from ATSR ADV and MODIS C6.1 for AOD tendencies estimation, *Atmos. Chem. Phys. Discuss.*, doi:10.5194/acp-2018-288, in review, 2018.
- Solomon, S., Portmann, R. W., Sanders, R. W., and Daniels, J. S.: On the role of nitrogen dioxide in the absorption of solar radiation, *J. Geophys. Res.*, 104(D10), 12047-12058, doi:10.1029/1999JD900035, 1999.
- Stammes, P.: Spectral radiance modelling in the UV-Visible range, in: *IRS 2000: Current Problems in Atmospheric Radiation*, edited by: Smith, W. L. and Timofeyev, Y. M., A. Deepak Publ., Hampton, VA, 385-388, 2001.
- Valks, P., Pinardi, G., Richter, A., Lambert, J.-C., Hao, N., Loyola, D., Van Roozendael, M., and Emmadi, S.: Operational total and tropospheric NO<sub>2</sub> column retrieval for GOME-2, *Atmos. Meas. Tech.*, 4, 1491-1514, doi:10.5194/amt-4-1491-2011, 2011.



- van der A, R. J., Peters, D. H. M. U., Eskes, H., Boersma, K. F., Van Roozendael, M., De Smedt, I., and Kelder, H. M.: Detection of the trend and seasonal variation in tropospheric NO<sub>2</sub> over China, *J. Geophys. Res.*, 111, 1-10, doi:10.1029/2005JD006594, 2006.
- van der A, R. J., Eskes, H. J., Boersma, K. F., van Noije, T. P. C., Van Roozendael, M., De Smedt, I., Peters, D. H. M. U.,  
5 and Meijer, E.W.: Trends, seasonal variability and dominant NO<sub>x</sub> source derived from a ten year record of NO<sub>2</sub> measured from space, *J. Geophys. Res.*, 113, 1-12, doi:10.1029/2007JD009021, 2008.
- van der A, R. J., Mijling, B., Ding, J., Koukouli, M. E., Liu, F., Li, Q., Mao, H., and Theys, N.: Cleaning up the air: effectiveness of air quality policy for SO<sub>2</sub> and NO<sub>x</sub> emissions in China, *Atmos. Chem. Phys.*, 17, 1775-1789, doi:10.5194/acp-17-1775-2017, 2017.
- 10 Vandaele, A. C., Fayt, C., Hendrick, F., Hermans, C., Humbled, F., Van Roozendael, M., Gil, M., Navarro, M., Puentedura, O., Yela, M., Braathen, G., Stebel, K., Tørnkvist, K., Johnston, P., Kreher, K., Goutail, F., Mieville, A., Pommereau, J.-P., Khaikine, S., Richter, A., Oetjen, H., Wittrock, F., Bugarski, S., Friess, U., Pfeilsticker, K., Sinreich, R., Wagner, T., Corlett, G., and Leigh, R.: An intercomparison campaign of ground-based UV-visible measurements of NO<sub>2</sub>, BrO, and OClO slant columns: Methods of analysis and results for NO<sub>2</sub>, *J. Geophys. Res.*, 110, D08305,  
15 doi:10.1029/2004JD005423, 2005.
- Veeffkind, J. P., Aben, I., McMullan, K., Forster, H., de Vries, J., Otter, G., Claas, J., Eskes, H. J., de Haan, J. F., Kleipool, Q., van Weele, M., Hasekamp, O., Hoogeveen, R., Landgraf, J., Snel, R., Tol, P., Ingmann, P., Voors, R., Kruizinga, B., Vink, R., Visser, H., and Levelt, P. F.: TROPOMI on the ESA Sentinel-5 Precursor: a GMES mission for global observations of the atmospheric composition for climate, air quality and ozone layer applications, *Remote Sens. Environ.*,  
20 120, 70-83, doi:10.1016/j.rse.2011.09.027, 2012.
- Vestreng, V., Ntziachristos, L., Semb, A., Reis, S., Isaksen, I. S. A., and Tarrasón, L.: Evolution of NO<sub>x</sub> emissions in Europe with focus on road transport control measures, *Atmos. Chem. Phys.*, 9, 1503-1520, doi:10.5194/acp-9-1503-2009, 2009.
- Vrekoussis, M., Richter, A., Hilboll, A., Burrows, J. P., Gerasopoulos, E., Lelieveld, J., Barrie, L., Zerefos, C., and Mihalopoulos, N.: Economic Crisis Detected from Space: Air Quality observations over Athens/Greece, *Geophys. Res. Lett.*, 40, 458-463, doi:10.1002/grl.50118, 2013.
- 25 Wang, Y., Beirle, S., Lampel, J., Koukouli, M., De Smedt, I., Theys, N., Li, A., Wu, D., Xie, P., Liu, C., Van Roozendael, M., Stavrou, T., Müller, J.-F., and Wagner, T.: Validation of OMI, GOME-2A and GOME-2B tropospheric NO<sub>2</sub>, SO<sub>2</sub> and HCHO products using MAX-DOAS observations from 2011 to 2014 in Wuxi, China: investigation of the effects of priori profiles and aerosols on the satellite products, *Atmos. Chem. Phys.*, 17, 5007-5033, doi:10.5194/acp-17-5007-2017,  
30 2017.
- WHO: Health Aspects of Air Pollution with Particulate Matter, Ozone and Nitrogen Dioxide, World Health Organization, Bonn, Germany, 2003.

World Bank Group: The Toll of War: The Economic and Social Consequences of the Conflict in Syria, available at: <https://openknowledge.worldbank.org/bitstream/handle/10986/27541/The%20Toll%20of%20War.pdf> (last access: 15 September 2018), 2017.

World Bank: <https://data.worldbank.org> (last access: 15 September 2018), 2018.

- 5 Wu, Y., Zhang, S., Hao, J., Liu, H., Wu, X., Hu, J., Walsh, M. P., Wallington, T. J., and Zhang, K. M. S.: Stevanovic, On-road vehicle emissions and their control in China: A review and outlook, *Sci. Total Environ.*, 574, 332-349, doi:10.1016/j.scitotenv.2016.09.040, 2017.

Zara, M., Boersma, K. F., De Smedt, I., Richter, A., Peters, E., van Geffen, J. H. G. M., Beirle, S., Wagner, T., Van Roozendael, M., Marchenko, S., Lamsal, L. N., and Eskes, H. J.: Improved slant column density retrieval of nitrogen dioxide and formaldehyde for OMI and GOME-2A from QA4ECV: intercomparison, uncertainty characterisation, and trends, *Atmos. Meas. Tech.*, 11, 4033-4058, doi:10.5194/amt-11-4033-2018, 2018.

10 Zhao, B., Wang, S. X., Liu, H., Xu, J. Y., Fu, K., Klimont, Z., Hao, J. M., He, K. B., Cofala, J., and Amann, M.: NO<sub>x</sub> emissions in China: historical trends and future perspectives, *Atmos. Chem. Phys.*, 13, 9869-9897, doi:10.5194/acp-13-9869-2013, 2013.

15

20

25

30

**Table 1:** Absolute trends (in  $10^{15}$  molecules  $\text{cm}^{-2}$   $\text{yr}^{-1}$ ) and trends relative to the fitted mean of the first year (in %  $\text{yr}^{-1}$ ) with the corresponding uncertainties ( $\pm 1\sigma$ ) for the period 4/1996-9/2017 for four regions of interest: ECH (eastern China), IPE (Iberian Peninsula), MEA (the Middle East) and SAM (south-eastern America). The year when a trend reversal was detected and the absolute and relative trend for the sub-period before and the sub-period after the detected trend reversal are also given. The year of reversal is included in both sub-periods while the relative trends are calculated relative to the fitted mean of each sub-period's first year. Bold characters are used to indicate the year of reversal and the statistically significant trends at the 95% confidence level.

| Region | Whole period      |                   |             | Before the reversal |                   | After the reversal |                   |
|--------|-------------------|-------------------|-------------|---------------------|-------------------|--------------------|-------------------|
|        | Abs. trend        | Rel. trend        | Reversal    | Abs. trend          | Rel. trend        | Abs. trend         | Rel. trend        |
| ECH    | <b>0.53±0.09</b>  | <b>10.51±1.77</b> | <b>2011</b> | <b>0.88±0.09</b>    | <b>31.27±3.18</b> | <b>-1.19±0.24</b>  | <b>-6.59±1.30</b> |
| IPE    | <b>-0.02±0.01</b> | <b>-0.94±0.39</b> | <b>2005</b> | <b>0.09±0.02</b>    | <b>5.19±1.27</b>  | <b>-0.09±0.01</b>  | <b>-3.49±0.52</b> |
| MEA    | <b>0.04±0.00</b>  | <b>2.98±0.27</b>  | <b>2012</b> | <b>0.04±0.00</b>    | <b>3.74±0.39</b>  | <b>-0.03±0.01</b>  | <b>-1.64±0.49</b> |
| SAM    | <b>0.03±0.00</b>  | <b>2.43±0.42</b>  | <b>2000</b> | <b>-0.07±0.03</b>   | <b>-4.77±2.22</b> | <b>0.05±0.00</b>   | <b>4.89±0.41</b>  |

**Table 2:** The same as Table 1 but for countries. In order to save space only countries that exhibit a trend reversal are shown here, while results for all the world countries are given in Table S1 of the Supplement.

| Country                   | Whole period          |                       |             | Before the reversal   |                       | After the reversal    |                        |
|---------------------------|-----------------------|-----------------------|-------------|-----------------------|-----------------------|-----------------------|------------------------|
|                           | Abs. trend            | Rel. trend            | Reversal    | Abs. trend            | Rel. trend            | Abs. trend            | Rel. trend             |
| Afghanistan               | 0.0029±0.0018         | 0.6114±0.3768         | <b>2011</b> | <b>0.0102±0.0024</b>  | <b>2.3918±0.5525</b>  | <b>-0.0338±0.0089</b> | <b>-5.3566±1.4061</b>  |
| Albania                   | <b>0.0209±0.0055</b>  | <b>2.7604±0.7302</b>  | <b>2012</b> | <b>0.0448±0.0073</b>  | <b>7.3462±1.2018</b>  | <b>-0.0672±0.0267</b> | <b>-5.4265±2.1563</b>  |
| Algeria                   | 0.0017±0.0015         | 0.3706±0.3100         | <b>2012</b> | <b>0.0045±0.0022</b>  | <b>1.0024±0.4884</b>  | <b>-0.0233±0.0066</b> | <b>-4.0611±1.1504</b>  |
| Angola                    | <b>-0.0049±0.0019</b> | <b>-0.4141±0.1591</b> | <b>2002</b> | <b>-0.0290±0.0127</b> | <b>-2.2477±0.9822</b> | 0.0020±0.0023         | 0.1877±0.2147          |
| Argentina                 | <b>0.0104±0.0032</b>  | <b>1.7992±0.5478</b>  | <b>2000</b> | <b>-0.0775±0.0159</b> | <b>-8.7719±1.8040</b> | <b>0.0234±0.0027</b>  | <b>5.0152±0.5857</b>   |
| Armenia                   | <b>0.0250±0.0035</b>  | <b>4.3776±0.6215</b>  | <b>2002</b> | <b>-0.0290±0.0117</b> | <b>-3.8537±1.5580</b> | <b>0.0304±0.0061</b>  | <b>4.5818±0.9141</b>   |
| Australia                 | -0.0018±0.0021        | -0.2923±0.3375        | <b>2012</b> | 0.0036±0.0027         | 0.6205±0.4608         | <b>-0.0477±0.0148</b> | <b>-6.7697±2.1079</b>  |
| Bermuda                   | <b>-0.0228±0.0034</b> | <b>-2.4517±0.3647</b> | <b>2002</b> | 0.0066±0.0213         | 0.7575±2.4317         | <b>-0.0200±0.0052</b> | <b>-2.5897±0.6755</b>  |
| Brazil                    | <b>0.0094±0.0024</b>  | <b>1.4344±0.3684</b>  | <b>2000</b> | -0.0164±0.0219        | -2.1790±2.9159        | <b>0.0147±0.0031</b>  | <b>2.3642±0.4951</b>   |
| Bulgaria                  | <b>0.0220±0.0058</b>  | <b>1.3198±0.3489</b>  | <b>2007</b> | <b>0.0576±0.0142</b>  | <b>3.8716±0.9559</b>  | <b>-0.0211±0.0139</b> | <b>-0.9824±0.6472</b>  |
| Burundi                   | 0.0012±0.0040         | 0.1153±0.3651         | <b>2003</b> | 0.0270±0.0237         | 2.7809±2.4419         | <b>-0.012±0.0050</b>  | <b>-1.0016±0.4169</b>  |
| Cambodia                  | <b>0.0203±0.0042</b>  | <b>2.6936±0.5543</b>  | <b>2001</b> | -0.0483±0.0242        | -5.2500±2.6257        | <b>0.0255±0.0060</b>  | <b>3.1563±0.7381</b>   |
| Cameroon                  | -0.0039±0.0033        | -0.2747±0.2341        | <b>2009</b> | 0.0078±0.0063         | 0.5757±0.4651         | <b>-0.0272±0.0107</b> | <b>-1.8324±0.7201</b>  |
| Canada                    | <b>-0.0054±0.0015</b> | <b>-1.2625±0.3547</b> | <b>2005</b> | <b>0.0120±0.0036</b>  | <b>3.4985±1.0472</b>  | <b>-0.0175±0.0029</b> | <b>-3.69±0.6161</b>    |
| Cape Verde                | <b>-0.0046±0.0021</b> | <b>-1.1166±0.4999</b> | <b>2012</b> | 0.0037±0.0028         | 1.0087±0.7792         | <b>-0.0456±0.0079</b> | <b>-10.6582±1.8546</b> |
| Central African Republic  | -0.0005±0.0046        | -0.0343±0.3148        | <b>2009</b> | <b>0.0207±0.0081</b>  | <b>1.5706±0.6150</b>  | <b>-0.0447±0.0118</b> | <b>-2.7184±0.7187</b>  |
| Chile                     | <b>0.0093±0.0024</b>  | <b>2.4781±0.6342</b>  | <b>2000</b> | -0.0469±0.0246        | -8.3516±4.3721        | <b>0.0178±0.0022</b>  | <b>5.6681±0.6909</b>   |
| China                     | <b>0.1191±0.0196</b>  | <b>7.5499±1.2398</b>  | <b>2011</b> | <b>0.1939±0.0196</b>  | <b>17.6742±1.7839</b> | <b>-0.2872±0.0480</b> | <b>-6.2108±1.0379</b>  |
| Congo Democratic Republic | <b>-0.0056±0.0024</b> | <b>-0.3605±0.1565</b> | <b>2009</b> | 0.0019±0.0043         | 0.1245±0.2862         | <b>-0.0263±0.0089</b> | <b>-1.6575±0.5613</b>  |
| Costa Rica                | -0.0020±0.0026        | -0.3007±0.3880        | <b>2002</b> | <b>-0.0494±0.0209</b> | <b>-5.9015±2.4891</b> | <b>0.0061±0.0025</b>  | <b>1.0466±0.4383</b>   |
| Cyprus                    | 0.0052±0.0050         | 0.3552±0.3362         | <b>2012</b> | 0.0137±0.0071         | 0.9659±0.5015         | <b>-0.0947±0.0222</b> | <b>-5.1421±1.2077</b>  |
| Czech Republic            | <b>-0.0377±0.0171</b> | <b>-0.8947±0.4055</b> | <b>2010</b> | 0.0109±0.0340         | 0.2764±0.8620         | <b>-0.1432±0.0434</b> | <b>-3.5321±1.0702</b>  |
| Djibouti                  | -0.0032±0.0017        | -0.4467±0.2427        | <b>2002</b> | <b>-0.0510±0.0094</b> | <b>-5.8558±1.0823</b> | 0.0035±0.0021         | 0.5575±0.3414          |
| East Timor                | -0.0037±0.0032        | -0.9943±0.8493        | <b>2006</b> | 0.0151±0.0093         | 5.4103±3.3292         | <b>-0.0252±0.0062</b> | <b>-5.2562±1.2851</b>  |
| Ecuador                   | <b>0.0294±0.0024</b>  | <b>7.4325±0.6026</b>  | <b>2001</b> | -0.0246±0.0185        | -4.6569±3.5030        | <b>0.0327±0.0037</b>  | <b>6.5174±0.7347</b>   |
| Egypt                     | 0.0017±0.0025         | 0.1842±0.2703         | <b>2003</b> | <b>-0.0284±0.0125</b> | <b>-2.7923±1.2302</b> | 0.006±0.0034          | 0.6797±0.3837          |
| El Salvador               | <b>0.0200±0.0049</b>  | <b>1.7220±0.4242</b>  | <b>2012</b> | <b>0.0251±0.0067</b>  | <b>2.2340±0.5990</b>  | -0.0494±0.0329        | -2.952±1.9641          |

|                                   |                       |                       |             |                       |                        |                       |                        |
|-----------------------------------|-----------------------|-----------------------|-------------|-----------------------|------------------------|-----------------------|------------------------|
| Equatorial Guinea                 | <b>0.0088±0.0044</b>  | <b>0.9342±0.4636</b>  | <b>2010</b> | <b>0.0252±0.0086</b>  | <b>2.9906±1.0231</b>   | -0.0202±0.0110        | -1.7862±0.9737         |
| Federated State of Micronesia     | -0.0001±0.0023        | -0.2939±4.9102        | <b>2011</b> | <b>0.0109±0.0029</b>  | <b>45.4599±12.3399</b> | <b>-0.0407±0.0104</b> | <b>-26.455±6.7765</b>  |
| French Guiana                     | <b>-0.0033±0.0016</b> | <b>-1.8853±0.8973</b> | <b>2012</b> | 0.0032±0.0020         | 2.3543±1.4845          | <b>-0.0409±0.0106</b> | <b>-19.466±5.0652</b>  |
| FYROM                             | <b>0.0506±0.0087</b>  | <b>4.7737±0.8199</b>  | <b>2011</b> | <b>0.0921±0.0127</b>  | <b>11.2700±1.5584</b>  | -0.0382±0.0284        | -1.9504±1.4509         |
| Gabon                             | <b>0.0076±0.0025</b>  | <b>0.7616±0.2480</b>  | <b>2010</b> | <b>0.0168±0.0047</b>  | <b>1.7778±0.4998</b>   | <b>-0.0132±0.0066</b> | <b>-1.1266±0.5611</b>  |
| Georgia                           | <b>0.0185±0.0030</b>  | <b>3.3733±0.5425</b>  | <b>2002</b> | -0.0303±0.0167        | -4.3192±2.3737         | <b>0.0231±0.0047</b>  | <b>3.7750±0.7683</b>   |
| Greece                            | <b>-0.0115±0.0050</b> | <b>-0.5762±0.2488</b> | <b>2012</b> | 0.0096±0.0065         | 0.5160±0.3497          | <b>-0.0804±0.02</b>   | <b>-4.2204±1.0521</b>  |
| Guatemala                         | <b>-0.0084±0.0030</b> | <b>-0.7180±0.2533</b> | <b>2006</b> | <b>-0.0305±0.0091</b> | <b>-2.4037±0.7162</b>  | 0.0059±0.0049         | 0.5876±0.4919          |
| Guyana                            | -0.0017±0.0016        | -0.7935±0.7515        | <b>2011</b> | <b>0.0054±0.0023</b>  | <b>3.1970±1.3736</b>   | <b>-0.0273±0.0068</b> | <b>-10.6217±2.6354</b> |
| Haiti                             | -0.0016±0.0025        | -0.1687±0.2621        | <b>2005</b> | <b>-0.0278±0.0079</b> | <b>-2.5883±0.7390</b>  | <b>0.0103±0.0044</b>  | <b>1.200±0.5168</b>    |
| Honduras                          | <b>0.0096±0.0027</b>  | <b>1.3414±0.3820</b>  | <b>2011</b> | <b>0.0132±0.0049</b>  | <b>1.9054±0.7064</b>   | <b>-0.0238±0.0103</b> | <b>-2.4065±1.0362</b>  |
| Hong Kong                         | -0.1302±0.0772        | -0.7319±0.4341        | <b>2004</b> | <b>0.9438±0.3372</b>  | <b>7.1514±2.5554</b>   | <b>-0.5415±0.1310</b> | <b>-2.7016±0.6538</b>  |
| Iran                              | <b>0.0320±0.0028</b>  | <b>3.2601±0.2806</b>  | <b>2012</b> | <b>0.0396±0.0039</b>  | <b>4.2237±0.4127</b>   | -0.0193±0.0104        | -1.2015±0.6469         |
| Iraq                              | <b>0.0638±0.0054</b>  | <b>6.7853±0.5747</b>  | <b>2012</b> | <b>0.0673±0.0077</b>  | <b>7.3758±0.8428</b>   | <b>-0.0509±0.0151</b> | <b>-2.1909±0.6517</b>  |
| Ireland                           | -0.0173±0.0117        | -1.1594±0.7837        | <b>2008</b> | 0.0331±0.0304         | 2.6778±2.4644          | <b>-0.0604±0.0275</b> | <b>-4.1221±1.8770</b>  |
| Jordan                            | -0.0023±0.0030        | -0.1431±0.1897        | <b>2012</b> | 0.0023±0.0041         | 0.1461±0.2623          | <b>-0.0786±0.0171</b> | <b>-4.4119±0.9570</b>  |
| Kazakhstan                        | <b>0.0146±0.0017</b>  | <b>2.8402±0.3358</b>  | <b>2011</b> | <b>0.0214±0.0023</b>  | <b>4.5142±0.4865</b>   | -0.0163±0.0088        | -1.9778±1.0691         |
| Kenya                             | 0.0002±0.0030         | 0.0458±0.6632         | <b>2009</b> | <b>0.0132±0.0039</b>  | <b>3.6187±1.0779</b>   | <b>-0.0354±0.0101</b> | <b>-5.872±1.6733</b>   |
| Kiribati                          | <b>-0.0047±0.0017</b> | <b>-4.8275±1.7292</b> | <b>2011</b> | <b>0.0030±0.0015</b>  | <b>6.3332±3.1309</b>   | <b>-0.0387±0.0085</b> | <b>-30.8337±6.7273</b> |
| Korea Dem. Peoples Rep. of        | <b>0.0817±0.0146</b>  | <b>10.7852±1.9232</b> | <b>2012</b> | <b>0.1409±0.0192</b>  | <b>38.0448±5.1952</b>  | <b>-0.2655±0.0958</b> | <b>-9.319±3.3648</b>   |
| Kuwait                            | <b>0.1001±0.0071</b>  | <b>3.7793±0.2697</b>  | <b>2012</b> | <b>0.1027±0.011</b>   | <b>3.9036±0.4171</b>   | -0.0438±0.0420        | -0.9225±0.8847         |
| Lao Peoples Democratic Republic   | <b>0.0117±0.0037</b>  | <b>1.4097±0.4467</b>  | <b>2002</b> | <b>-0.0536±0.0177</b> | <b>-5.2885±1.7500</b>  | <b>0.0156±0.0056</b>  | <b>1.7881±0.6434</b>   |
| Lesotho                           | -0.008±0.0064         | -0.5481±0.4428        | <b>2005</b> | <b>-0.0478±0.0220</b> | <b>-2.9513±1.3542</b>  | 0.0074±0.0137         | 0.5805±1.0714          |
| Madagascar                        | 0.0000±0.0016         | -0.0070±0.2623        | <b>2002</b> | <b>-0.0385±0.0096</b> | <b>-5.1708±1.2862</b>  | <b>0.0055±0.0019</b>  | <b>0.9849±0.3454</b>   |
| Malawi                            | -0.0014±0.0022        | -0.1548±0.2420        | <b>2011</b> | 0.0042±0.0035         | 0.4749±0.3992          | <b>-0.0212±0.0071</b> | <b>-2.2921±0.7663</b>  |
| Maldives                          | -0.0043±0.0025        | -1.9645±1.1350        | <b>2011</b> | <b>0.0116±0.0024</b>  | <b>9.7829±2.0585</b>   | <b>-0.0554±0.0079</b> | <b>-19.3643±2.7647</b> |
| Malta                             | <b>0.0177±0.0052</b>  | <b>1.5767±0.4593</b>  | <b>2006</b> | <b>0.0483±0.0142</b>  | <b>5.1252±1.5113</b>   | <b>-0.0349±0.0107</b> | <b>-2.1134±0.6484</b>  |
| Marshall Islands                  | <b>-0.0035±0.0016</b> | <b>-3.0714±1.3829</b> | <b>2011</b> | 0.0034±0.0018         | 4.9668±2.6177          | <b>-0.0335±0.0062</b> | <b>-22.2594±4.0904</b> |
| Mexico                            | 0.0029±0.0022         | 0.2644±0.1982         | <b>2012</b> | <b>0.0094±0.0029</b>  | <b>0.8960±0.2735</b>   | <b>-0.0463±0.0126</b> | <b>-3.6619±0.9999</b>  |
| Mongolia                          | 0.0001±0.0010         | 0.0302±0.5091         | <b>2000</b> | <b>-0.0251±0.0093</b> | <b>-9.2670±3.4436</b>  | 0.0019±0.0012         | 1.1074±0.6748          |
| Morocco (includes Western Sahara) | <b>0.0046±0.0018</b>  | <b>0.9063±0.3534</b>  | <b>2012</b> | <b>0.0076±0.0027</b>  | <b>1.5619±0.5433</b>   | <b>-0.036±0.0072</b>  | <b>-5.0847±1.0175</b>  |
| Namibia                           | <b>-0.0096±0.0030</b> | <b>-1.0167±0.3168</b> | <b>2002</b> | <b>-0.0642±0.0196</b> | <b>-5.5977±1.7121</b>  | 0.0004±0.0031         | 0.0461±0.3877          |
| Netherland Antilles               | 0.0021±0.0025         | 0.3510±0.4331         | <b>2001</b> | <b>-0.0605±0.0147</b> | <b>-8.2963±2.0119</b>  | 0.0015±0.0035         | 0.2542±0.5855          |
| New Zealand                       | -0.0020±0.0015        | -0.8321±0.6331        | <b>2002</b> | <b>-0.0275±0.0075</b> | <b>-8.7459±2.3723</b>  | 0.0017±0.0024         | 0.9180±1.2578          |
| Niger                             | -0.0019±0.0017        | -0.3483±0.3195        | <b>2011</b> | 0.0018±0.0025         | 0.3571±0.4931          | <b>-0.0255±0.0085</b> | <b>-4.3612±1.4539</b>  |
| Northern Mariana Islands          | 0.0040±0.0021         | 3.2417±1.7180         | <b>2001</b> | <b>-0.0382±0.0101</b> | <b>-18.7322±4.9383</b> | 0.0038±0.0032         | 2.5953±2.1825          |
| Occupied Palestinian Territory    | <b>-0.0290±0.0113</b> | <b>-0.4670±0.1826</b> | <b>2006</b> | 0.0314±0.0349         | 0.5336±0.5925          | <b>-0.0739±0.0238</b> | <b>-1.1904±0.3839</b>  |
| Oman                              | 0.0014±0.0017         | 0.2335±0.2796         | <b>2011</b> | 0.0038±0.0029         | 0.6574±0.5016          | <b>-0.0191±0.0041</b> | <b>-2.7691±0.5890</b>  |
| Pakistan                          | <b>0.0208±0.0030</b>  | <b>2.3023±0.3363</b>  | <b>2011</b> | <b>0.0335±0.0044</b>  | <b>4.0560±0.5381</b>   | <b>-0.0242±0.0088</b> | <b>-1.8079±0.6563</b>  |
| Palau                             | 0.0004±0.0023         | 1.0487±6.5205         | <b>2011</b> | <b>0.0117±0.0034</b>  | <b>35.1571±10.1795</b> | <b>-0.0263±0.0078</b> | <b>-28.3565±8.4076</b> |
| Panama                            | <b>0.0056±0.0021</b>  | <b>0.9313±0.3520</b>  | <b>2000</b> | -0.0376±0.0245        | -4.9519±3.2328         | <b>0.0112±0.0023</b>  | <b>1.9829±0.4106</b>   |
| Papua New Guinea                  | -0.0011±0.0017        | -0.4199±0.6719        | <b>2012</b> | 0.0045±0.0024         | 2.0089±1.0687          | <b>-0.0340±0.0077</b> | <b>-10.8245±2.4424</b> |
| Paraguay                          | <b>0.0184±0.0054</b>  | <b>2.5541±0.7540</b>  | <b>2000</b> | -0.0602±0.0494        | -5.7158±4.6892         | <b>0.0361±0.0060</b>  | <b>6.2212±1.0286</b>   |
| Peru                              | <b>0.0048±0.0023</b>  | <b>1.0578±0.5008</b>  | <b>2010</b> | <b>0.0139±0.0034</b>  | <b>3.5134±0.8623</b>   | <b>-0.0289±0.0077</b> | <b>-4.5065±1.195</b>   |
| Portugal                          | -0.008±0.0107         | -0.4469±0.5982        | <b>2005</b> | <b>0.1169±0.0264</b>  | <b>9.9875±2.2602</b>   | <b>-0.0933±0.0158</b> | <b>-4.0221±0.6799</b>  |
| Puerto Rico                       | <b>-0.0222±0.0035</b> | <b>-1.5354±0.2396</b> | <b>2005</b> | 0.0062±0.0121         | 0.4776±0.9298          | <b>-0.0490±0.0049</b> | <b>-3.375±0.3392</b>   |
| Qatar                             | <b>0.0880±0.0086</b>  | <b>2.8375±0.2772</b>  | <b>2004</b> | -0.0051±0.0286        | -0.1483±0.8283         | <b>0.1094±0.0165</b>  | <b>3.0132±0.4541</b>   |
| Republic of Moldova               | <b>0.0232±0.0078</b>  | <b>1.3517±0.4519</b>  | <b>2000</b> | <b>-0.1921±0.0619</b> | <b>-8.7806±2.8311</b>  | <b>0.0313±0.0105</b>  | <b>1.8294±0.6159</b>   |
| Russia                            | <b>0.0065±0.0018</b>  | <b>1.2970±0.3503</b>  | <b>2000</b> | <b>-0.0204±0.0072</b> | <b>-3.7857±1.3259</b>  | <b>0.0053±0.0023</b>  | <b>0.9787±0.4302</b>   |
| Saint Helena                      | 0.002±0.0034          | 0.6229±1.0762         | <b>2000</b> | <b>-0.0944±0.0301</b> | <b>-16.3114±5.2061</b> | 0.0081±0.0041         | 3.2262±1.6367          |
| Saint Vincent                     | -0.0024±0.0018        | -0.6429±0.4857        | <b>2011</b> | 0.0054±0.0028         | 1.6802±0.8685          | <b>-0.0394±0.006</b>  | <b>-8.7857±1.3412</b>  |

|                              |                       |                        |      |                       |                         |                       |                        |
|------------------------------|-----------------------|------------------------|------|-----------------------|-------------------------|-----------------------|------------------------|
| Sao Tome and Principe        | 0.0043±0.0025         | 0.6455±0.3720          | 2010 | 0.0071±0.0048         | 1.1260±0.7615           | -0.0182±0.008         | -2.2260±0.9838         |
| Saudi Arabia                 | 0.0013±0.0020         | 0.1253±0.1958          | 2011 | 0.0007±0.0036         | 0.0715±0.3454           | -0.0307±0.0049        | -2.5586±0.4086         |
| Senegal                      | -0.0013±0.0025        | -0.1413±0.2828         | 2011 | 0.0057±0.0038         | 0.6671±0.4461           | -0.0341±0.0122        | -3.4912±1.2513         |
| Seychelles                   | <b>0.0100±0.0028</b>  | <b>90.5183±25.5488</b> | 2000 | <b>-0.0344±0.0166</b> | <b>-98.5144±47.5564</b> | 0.0041±0.0035         | 3.5286±2.9576          |
| Sierra Leone                 | -0.0019±0.0032        | -0.1684±0.2927         | 2002 | <b>-0.0560±0.0244</b> | <b>-4.5381±1.9821</b>   | 0.0001±0.0043         | 0.0064±0.3946          |
| Solomon Islands              | -0.0028±0.0017        | -2.4917±1.5541         | 2011 | <b>0.0082±0.0015</b>  | <b>19.3010±3.5311</b>   | -0.0456±0.0063        | -24.4952±3.4029        |
| Spain                        | <b>-0.0291±0.0078</b> | <b>-1.2120±0.3263</b>  | 2006 | <b>0.0588±0.0180</b>  | <b>2.9974±0.9178</b>    | -0.0802±0.0109        | -3.3243±0.4535         |
| Sri Lanka                    | <b>0.0102±0.0026</b>  | <b>1.9198±0.4955</b>   | 2012 | <b>0.0227±0.0032</b>  | <b>5.0066±0.6998</b>    | -0.0346±0.0125        | -4.5187±1.6306         |
| Sweden                       | -0.0165±0.0085        | -1.4335±0.7371         | 2010 | 0.0047±0.0157         | 0.4572±1.5157           | -0.1017±0.0336        | -8.0913±2.6696         |
| Syrian Arab Republic         | <b>0.0188±0.0061</b>  | <b>1.1265±0.3665</b>   | 2012 | <b>0.0487±0.0069</b>  | <b>3.2961±0.4683</b>    | -0.1024±0.0161        | -4.7261±0.7427         |
| Thailand                     | <b>0.0185±0.0041</b>  | <b>1.3299±0.2967</b>   | 2001 | <b>-0.0844±0.0270</b> | <b>-5.1037±1.6331</b>   | <b>0.0283±0.0054</b>  | <b>2.0382±0.3893</b>   |
| Togo                         | -0.0025±0.0040        | -0.1975±0.3190         | 2011 | <b>0.0159±0.0053</b>  | <b>1.3835±0.4578</b>    | -0.0315±0.0243        | -2.4742±1.9129         |
| Trinidad and Tobago          | 0.0048±0.0030         | 0.7763±0.4876          | 2011 | <b>0.0121±0.0049</b>  | <b>2.1233±0.8502</b>    | -0.0341±0.0128        | -4.2440±1.5982         |
| Tunisia                      | <b>0.0075±0.0020</b>  | <b>1.0234±0.2715</b>   | 2012 | <b>0.0122±0.0027</b>  | <b>1.7361±0.3808</b>    | -0.0419±0.0109        | -4.2392±1.1033         |
| Turkey                       | <b>0.0152±0.0038</b>  | <b>1.1898±0.2942</b>   | 2012 | <b>0.0166±0.0057</b>  | <b>1.3080±0.4521</b>    | -0.0136±0.0223        | -0.8418±1.3730         |
| Turkmenistan                 | <b>0.0080±0.0018</b>  | <b>1.3365±0.3058</b>   | 2012 | <b>0.0126±0.0026</b>  | <b>2.2023±0.4633</b>    | -0.0207±0.0092        | -2.5887±1.1523         |
| Ukraine                      | <b>0.0230±0.0056</b>  | <b>1.1157±0.2737</b>   | 2000 | -0.0999±0.0573        | -4.3258±2.4805          | <b>0.0247±0.0072</b>  | <b>1.1630±0.3410</b>   |
| United Arab Emirates         | <b>0.0408±0.0043</b>  | <b>1.9971±0.2082</b>   | 2008 | <b>0.0594±0.0101</b>  | <b>3.0777±0.5209</b>    | -0.0076±0.0108        | -0.2738±0.3884         |
| United Rep. of Tanzania      | 0.0019±0.0025         | 0.2627±0.3447          | 2009 | <b>0.0120±0.0039</b>  | <b>1.8099±0.5831</b>    | -0.0247±0.0092        | -2.9026±1.0848         |
| United States Virgin Islands | <b>-0.0063±0.0028</b> | <b>-1.1100±0.5002</b>  | 2010 | 0.0082±0.0051         | 1.6927±1.0481           | <b>-0.0431±0.0074</b> | <b>-7.0744±1.2163</b>  |
| Uruguay                      | <b>0.01300±0.0035</b> | <b>2.1241±0.5704</b>   | 2001 | -0.0345±0.0231        | -4.313±2.8919           | <b>0.0226±0.0047</b>  | <b>3.915±0.8233</b>    |
| Viet Nam                     | <b>0.0331±0.0036</b>  | <b>4.5861±0.4982</b>   | 2002 | -0.0215±0.0188        | -2.3865±2.0850          | <b>0.0409±0.0053</b>  | <b>4.8399±0.6269</b>   |
| Western Samoa                | <b>-0.0043±0.0016</b> | <b>-2.9344±1.0942</b>  | 2011 | 0.0006±0.0026         | 0.5205±2.1668           | <b>-0.0264±0.0064</b> | <b>-17.4793±4.2234</b> |
| Yemen                        | 0.0002±0.0021         | 0.0255±0.3355          | 2012 | 0.0053±0.0028         | 0.9131±0.4802           | <b>-0.0393±0.0086</b> | <b>-5.4864±1.2043</b>  |

**Table 3:** The same as Table 1 but for megacities and large urban agglomerations.

| Population hot spot/Country | Whole period          |                       |          | Before the reversal   |                         | After the reversal    |                       |
|-----------------------------|-----------------------|-----------------------|----------|-----------------------|-------------------------|-----------------------|-----------------------|
|                             | Abs. trend            | Rel. trend            | Reversal | Abs. trend            | Rel. trend              | Abs. trend            | Rel. trend            |
| Algiers/Algeria             | <b>0.1067±0.0116</b>  | <b>3.7546±0.4074</b>  | -        | -                     | -                       | -                     | -                     |
| Athens/Greece               | <b>-0.1389±0.0168</b> | <b>-1.8511±0.2237</b> | 2010     | <b>-0.132±0.0335</b>  | <b>-1.7603±0.447</b>    | 0.035±0.0471          | 0.7368±0.9919         |
| Atlanta/U.S.                | <b>-0.1877±0.0326</b> | <b>-1.9143±0.3322</b> | 2005     | 0.136±0.1209          | 1.6073±1.4295           | <b>-0.2712±0.0572</b> | <b>-3.1238±0.6591</b> |
| Baghdad/Iraq                | <b>0.4167±0.0194</b>  | <b>16.9512±0.7872</b> | -        | -                     | -                       | -                     | -                     |
| Bangalore/India             | <b>0.0563±0.0147</b>  | <b>2.3736±0.6188</b>  | 2000     | -0.126±0.0812         | -4.527±2.9187           | <b>0.0623±0.0198</b>  | <b>2.4822±0.7882</b>  |
| Bangkok/Thailand            | <b>0.1027±0.0363</b>  | <b>1.3366±0.4731</b>  | 2000     | <b>-0.5126±0.2235</b> | <b>-5.455±2.3784</b>    | <b>0.1551±0.047</b>   | <b>2.0616±0.625</b>   |
| Beijing/China               | <b>1.3639±0.1846</b>  | <b>6.3824±0.8637</b>  | 2011     | <b>2.3336±0.254</b>   | <b>15.0678±1.6398</b>   | -1.2832±0.7816        | -2.7203±1.6568        |
| Boston/U.S.                 | <b>-0.6011±0.0732</b> | <b>-3.5023±0.4268</b> | 2002     | 0.1483±0.2827         | 0.9363±1.7853           | <b>-0.4863±0.1282</b> | <b>-3.8831±1.024</b>  |
| Buenos Aires/Argentina      | -0.0413±0.0361        | -0.4606±0.4019        | 2002     | <b>-0.6614±0.2381</b> | <b>-5.8305±2.0989</b>   | <b>0.1378±0.0461</b>  | <b>1.974±0.6599</b>   |
| Cairo/Egypt                 | <b>0.2209±0.016</b>   | <b>3.8884±0.2812</b>  | -        | -                     | -                       | -                     | -                     |
| Chengdu/China               | <b>0.7192±0.0819</b>  | <b>11.6631±1.3279</b> | -        | -                     | -                       | -                     | -                     |
| Chicago/U.S.                | <b>-0.4966±0.0533</b> | <b>-2.5189±0.2702</b> | -        | -                     | -                       | -                     | -                     |
| Chongqing/China             | <b>0.863±0.143</b>    | <b>28.1051±4.6582</b> | 2011     | <b>1.2461±0.2767</b>  | <b>223.2413±49.5666</b> | -0.4668±0.6464        | -2.2276±3.0848        |
| Damascus/Syria              | <b>0.1039±0.0167</b>  | <b>2.6515±0.4257</b>  | 2012     | <b>0.1962±0.0189</b>  | <b>5.8739±0.5662</b>    | <b>-0.171±0.0602</b>  | <b>-2.9206±1.0281</b> |
| Delhi/India                 | <b>0.1981±0.0295</b>  | <b>3.0992±0.4618</b>  | -        | -                     | -                       | -                     | -                     |
| Dhaka/Bangladesh            | <b>0.2928±0.0222</b>  | <b>16.5686±1.258</b>  | -        | -                     | -                       | -                     | -                     |
| Guangzhou/China             | -0.0041±0.155         | -0.0149±0.5593        | -        | -                     | -                       | -                     | -                     |
| Ho Chi Minh City/Vietnam    | <b>0.104±0.0118</b>   | <b>6.0077±0.6825</b>  | -        | -                     | -                       | -                     | -                     |
| Hong Kong                   | -0.1403±0.0719        | -0.8636±0.4424        | 2004     | 0.6006±0.3238         | 4.5684±2.4632           | <b>-0.4253±0.1337</b> | <b>-2.4391±0.7669</b> |
| Houston/U.S.                | <b>-0.1922±0.0385</b> | <b>-1.7269±0.346</b>  | -        | -                     | -                       | -                     | -                     |
| Hyderabad/India             | <b>0.0736±0.01</b>    | <b>3.6592±0.4981</b>  | -        | -                     | -                       | -                     | -                     |

|                           |                |                |      |                |                |                |                |
|---------------------------|----------------|----------------|------|----------------|----------------|----------------|----------------|
| Istanbul/Turkey           | -0.1183±0.0612 | -0.8412±0.4351 | -    | -              | -              | -              | -              |
| Jakarta/Indonesia         | 0.0543±0.0379  | 0.5536±0.3864  | 2010 | -0.0552±0.0671 | -0.5237±0.6366 | 0.6451±0.0971  | 7.955±1.1971   |
| Jeddah/Saudi Arabia       | 0.1074±0.0212  | 1.9974±0.3951  | 2006 | -0.0945±0.0455 | -1.4672±0.7062 | 0.2892±0.0494  | 5.514±0.9424   |
| Johannesburg/South Africa | -0.1095±0.0493 | -0.6881±0.3097 | 2010 | -0.0833±0.0924 | -0.5267±0.5842 | 0.3505±0.108   | 2.8627±0.8819  |
| Kabul/ Afghanistan        | 0.1626±0.0108  | 59.1318±3.9214 | -    | -              | -              | -              | -              |
| Karachi/Pakistan          | 0.1457±0.0132  | 5.2117±0.4705  | -    | -              | -              | -              | -              |
| Khartoum/Sudan            | 0.0125±0.005   | 1.0543±0.4192  | 2002 | -0.0736±0.0361 | -4.7861±2.3473 | 0.0349±0.0046  | 3.3235±0.4371  |
| Kinshasa/ Congo Dem. Rep. | 0.002±0.0142   | 0.0861±0.5987  | 2005 | -0.107±0.044   | -3.5497±1.4579 | 0.0785±0.0211  | 4.4886±1.2062  |
| Kolkata/India             | 0.115±0.0101   | 3.9462±0.3476  | -    | -              | -              | -              | -              |
| Lagos/Nigeria             | 0.0986±0.0155  | 5.0244±0.7892  | -    | -              | -              | -              | -              |
| Lahore/India              | 0.2477±0.0319  | 7.0208±0.9033  | 2006 | -0.2831±0.1796 | -4.4953±2.8511 | 0.3106±0.0382  | 6.3906±0.7868  |
| Lima/Peru                 | 0.2048±0.0351  | 11.6431±1.9953 | -    | -              | -              | -              | -              |
| London/U.K.               | -0.3299±0.0618 | -1.7508±0.3279 | -    | -              | -              | -              | -              |
| Los Angeles/U.S.          | -1.3409±0.1068 | -3.0652±0.2441 | 2000 | 3.392±1.0294   | 10.2779±3.1192 | -1.6087±0.1215 | -3.8522±0.2909 |
| Madras/India              | 0.0994±0.0111  | 4.1378±0.4618  | -    | -              | -              | -              | -              |
| Manila/Philippines        | -0.1915±0.0414 | -2.1756±0.4702 | 2009 | -0.5284±0.0546 | -4.9194±0.508  | 0.4866±0.0635  | 13.7662±1.7965 |
| Melbourne/Australia       | -0.052±0.022   | -0.7551±0.319  | -    | -              | -              | -              | -              |
| Mexico City/Mexico        | 0.1705±0.0937  | 0.769±0.4226   | -    | -              | -              | -              | -              |
| Mumbai/India              | 0.1324±0.0155  | 3.2392±0.3794  | -    | -              | -              | -              | -              |
| Nagoya/Japan              | -0.2919±0.0862 | -1.4545±0.4292 | -    | -              | -              | -              | -              |
| Nairobi/Kenya             | 0.0544±0.0081  | 7.0624±1.0563  | -    | -              | -              | -              | -              |
| New York/U.S.             | -0.702±0.0899  | -2.2804±0.2922 | -    | -              | -              | -              | -              |
| Osaka/Japan               | 0.0597±0.0652  | 0.434±0.4741   | 2004 | 0.6195±0.2964  | 5.6022±2.6807  | -0.3963±0.102  | -2.1992±0.5659 |
| Paris/France              | -0.3628±0.0534 | -1.9942±0.2935 | -    | -              | -              | -              | -              |
| Philadelphia/U.S.         | -0.4594±0.0829 | -2.3181±0.4184 | -    | -              | -              | -              | -              |
| Po Valley/Italy           | -0.5378±0.0715 | -2.2338±0.2972 | -    | -              | -              | -              | -              |
| Rhein-Ruhr/Germany        | -0.2739±0.0546 | -1.4319±0.2854 | -    | -              | -              | -              | -              |
| Rio de Janeiro/Brazil     | -0.0515±0.0403 | -0.5932±0.4648 | 2006 | -0.3246±0.1396 | -3.1932±1.3737 | 0.2083±0.0505  | 3.2112±0.7788  |
| Riyadh/Saudi Arabia       | 0.2506±0.033   | 2.8057±0.369   | -    | -              | -              | -              | -              |
| San Francisco/U.S.        | -0.1811±0.0182 | -1.8484±0.1856 | 2000 | 0.4305±0.2047  | 5.7477±2.7329  | -0.2823±0.0221 | -2.7484±0.2153 |
| Santiago/Chile            | 0.3821±0.045   | 6.7049±0.7905  | 2001 | -0.4556±0.339  | -5.2588±3.9133 | 0.5314±0.0571  | 8.9297±0.9588  |
| Sao Paulo/Brazil          | 0.1778±0.0612  | 1.5499±0.5335  | -    | -              | -              | -              | -              |
| Seoul/Korea               | -0.1644±0.1654 | -0.4773±0.4804 | -    | -              | -              | -              | -              |
| Shanghai/China            | 0.5892±0.0897  | 2.7416±0.4176  | 2008 | 1.2375±0.1843  | 6.9126±1.0293  | -0.3565±0.2454 | -1.0754±0.7403 |
| Shenyang/China            | 0.9094±0.0797  | 16.2605±1.4244 | 2011 | 1.2764±0.1153  | 38.5851±3.4841 | -0.8018±0.368  | -3.2729±1.5023 |
| Shenzhen/China            | -0.2418±0.1057 | -1.1426±0.4996 | 2004 | 1.1553±0.4633  | 7.6024±3.0484  | -0.8052±0.1728 | -3.3769±0.7248 |
| Sydney/Australia          | -0.0155±0.0288 | -0.2052±0.3805 | -    | -              | -              | -              | -              |
| Taipei/Taiwan             | -0.0222±0.0505 | -0.2457±0.5592 | 2005 | 0.3101±0.1729  | 4.2073±2.3458  | -0.2798±0.1127 | -2.5731±1.0366 |
| Tehran/Iran               | 0.8143±0.055   | 8.58±0.5793    | -    | -              | -              | -              | -              |
| Tianjin/China             | 1.7816±0.1703  | 14.8844±1.4228 | 2011 | 2.6934±0.2402  | 42.6832±3.8066 | -1.5974±0.4331 | -3.3685±0.9134 |
| Tokyo/Japan               | 0.0274±0.1295  | 0.1188±0.5607  | 2005 | 1.2691±0.5074  | 7.0772±2.8294  | -0.5473±0.1592 | -2.0107±0.5849 |
| Washington/U.S.           | -0.2128±0.0522 | -1.6797±0.4117 | -    | -              | -              | -              | -              |
| Wuhan/China               | 0.5741±0.0544  | 7.0464±0.6676  | 2012 | 0.7595±0.0776  | 10.8972±1.1135 | -0.4586±0.2236 | -2.3492±1.1456 |

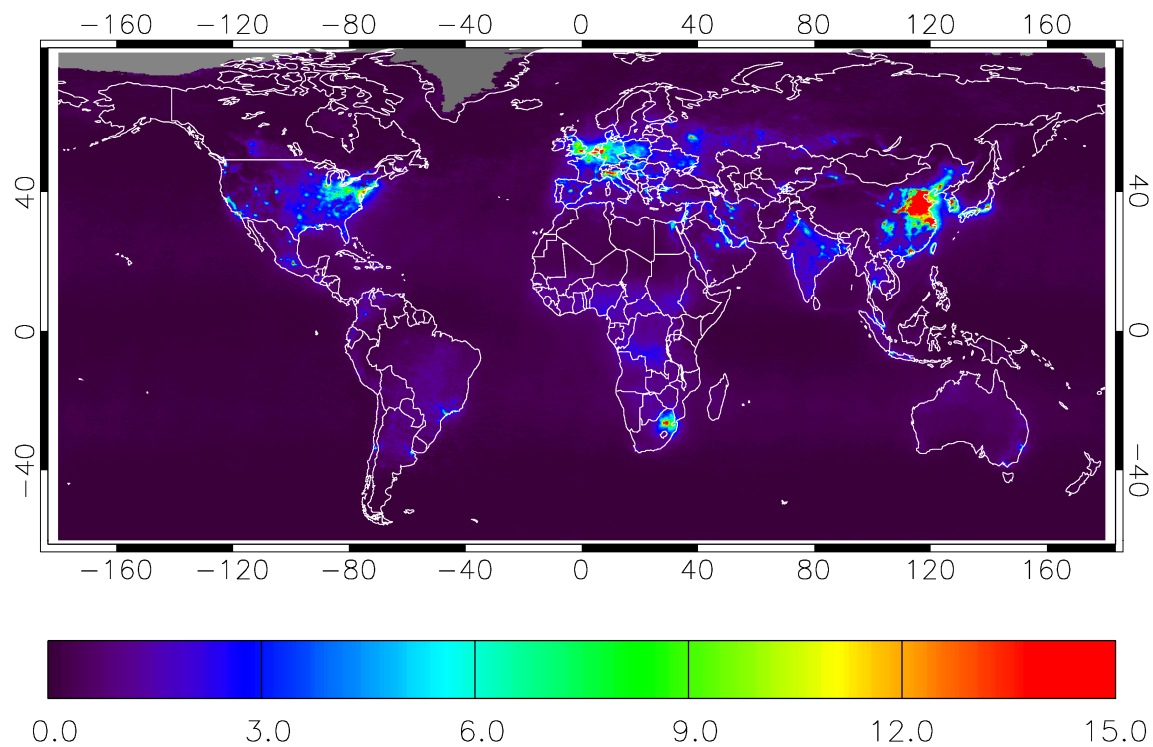

**Figure 1:** Tropospheric NO<sub>2</sub> VCD (in 10<sup>15</sup> molecules cm<sup>-2</sup>) patterns as seen using the self-consistent GOME, SCIAMACHY and GOME-2 dataset for the combined period (4/1996-9/2017).



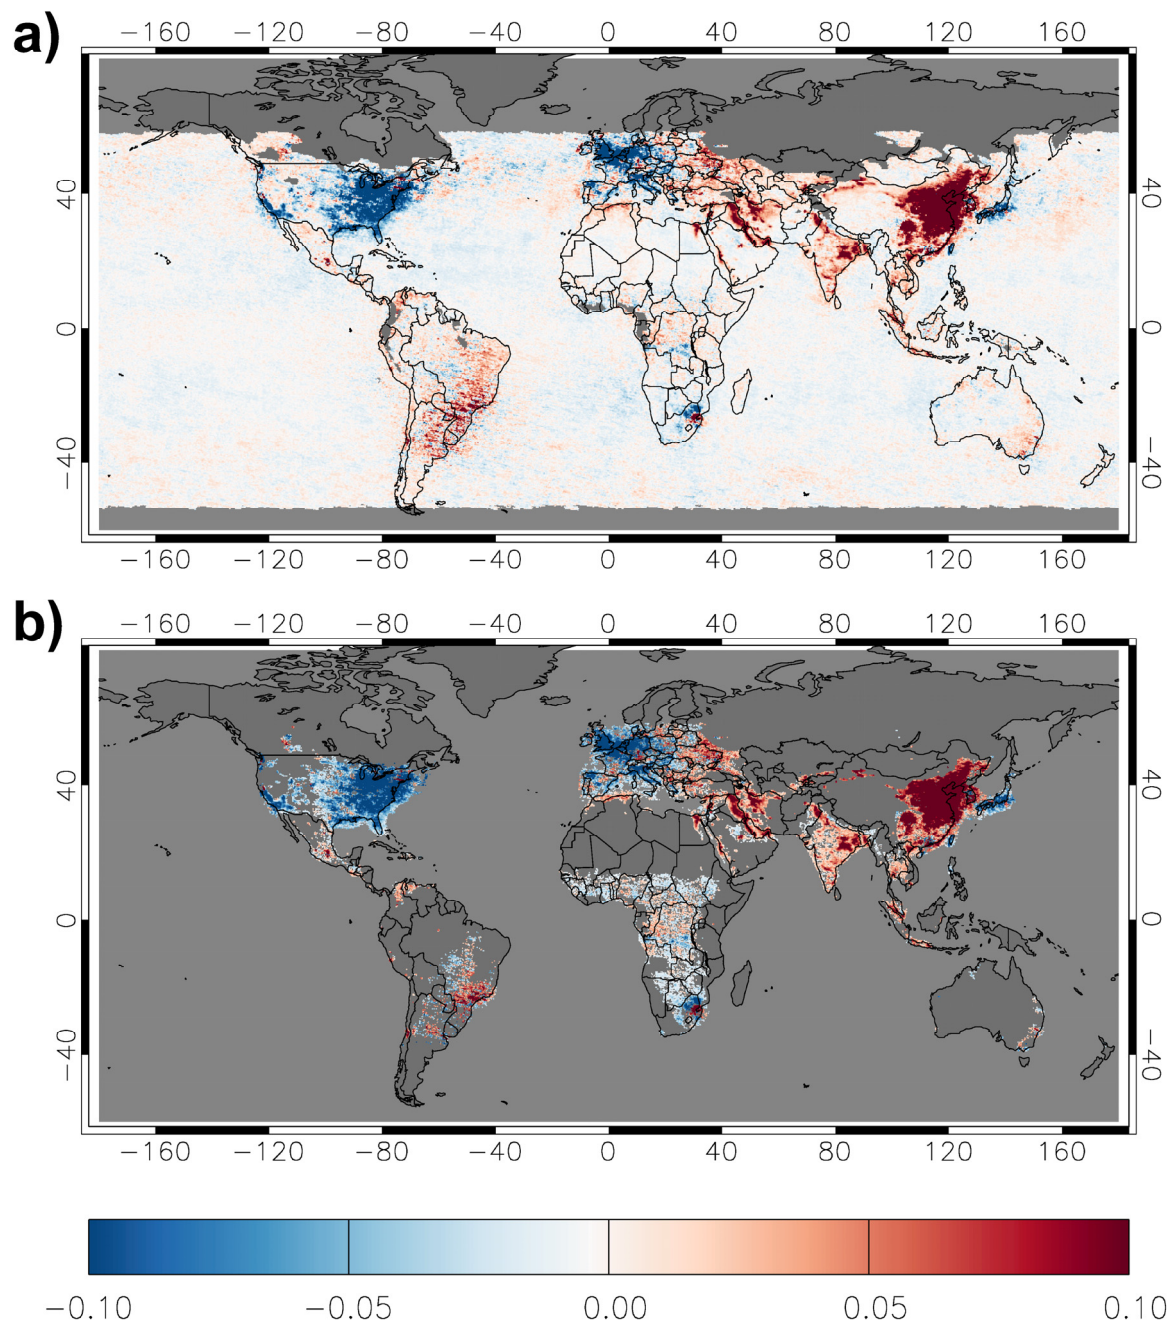

**Figure 2:** (a) Satellite-based trends of tropospheric NO<sub>2</sub> VCD (in  $10^{15}$  molecules  $\text{cm}^{-2}$   $\text{yr}^{-1}$ ) for the period 4/1996-9/2017. Only trends calculated for timeseries with at least 8 months per year are taken into consideration. (b) Same as (a) but for statistically significant trends at the 95% confidence level and for grid cells with a long term tropospheric NO<sub>2</sub> VCD mean of at least  $1 \times 10^{15}$  molecules  $\text{cm}^{-2}$ .

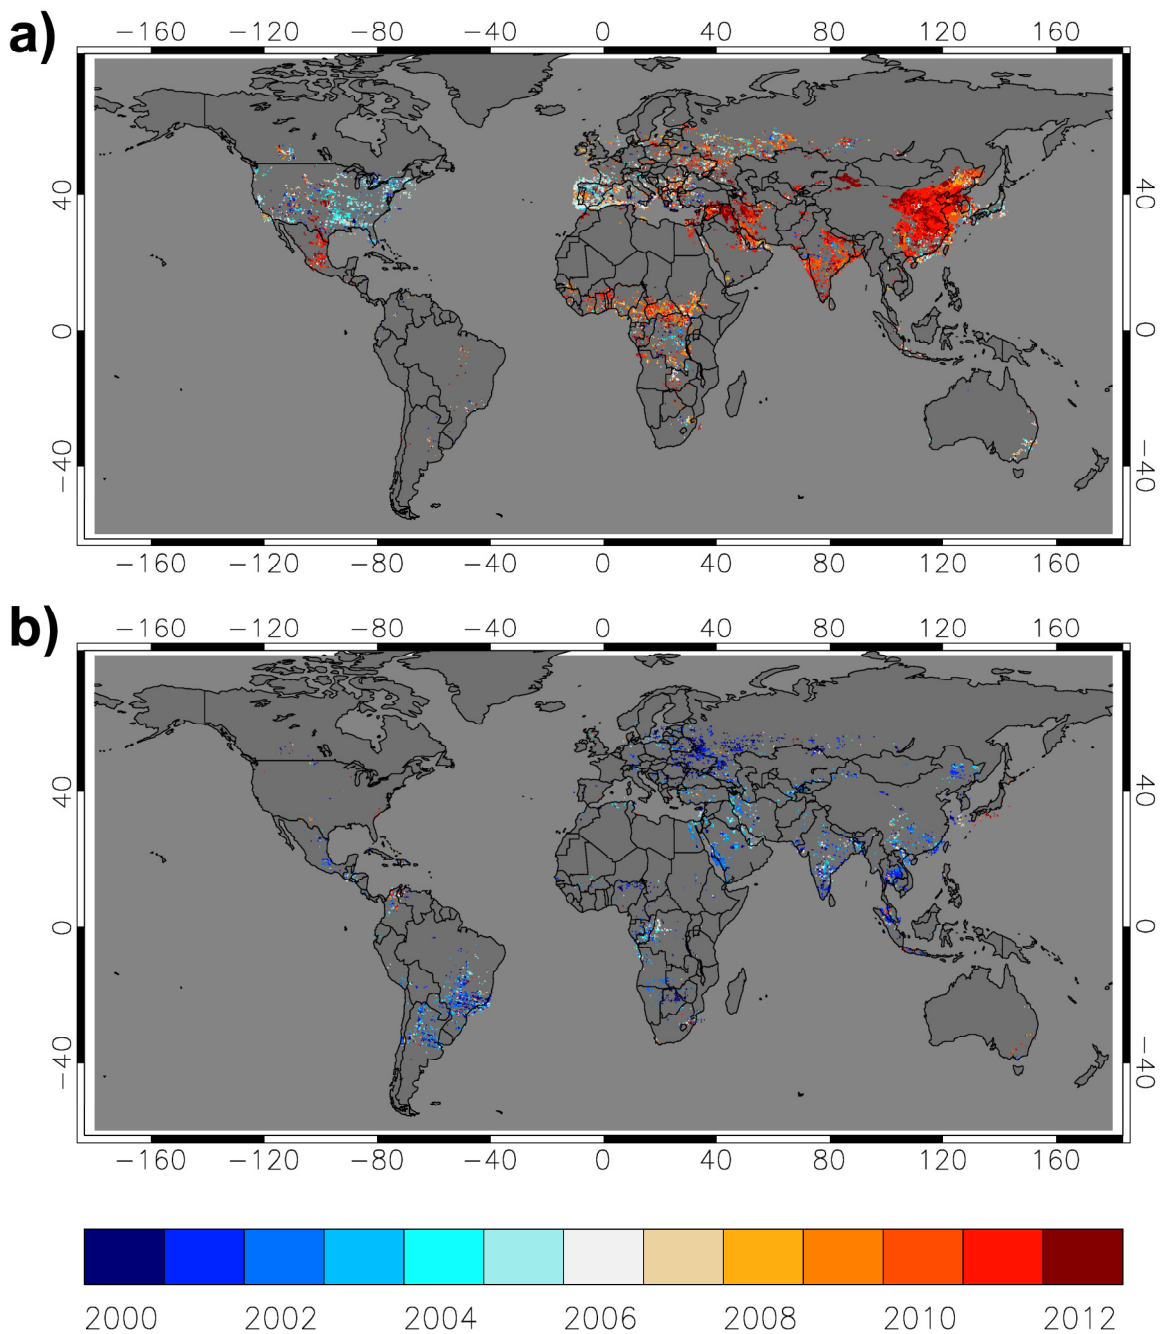

**Figure 3:** Year of tropospheric NO<sub>2</sub> VCD trend reversal from positive to negative (a) and from negative to positive (b). Only grid cells with a statistically significant trend at the 95% confidence level for the period before or after the year of reversal and with a long term tropospheric NO<sub>2</sub> VCD mean of at least  $1 \times 10^{15}$  molecules cm<sup>-2</sup> are shown.

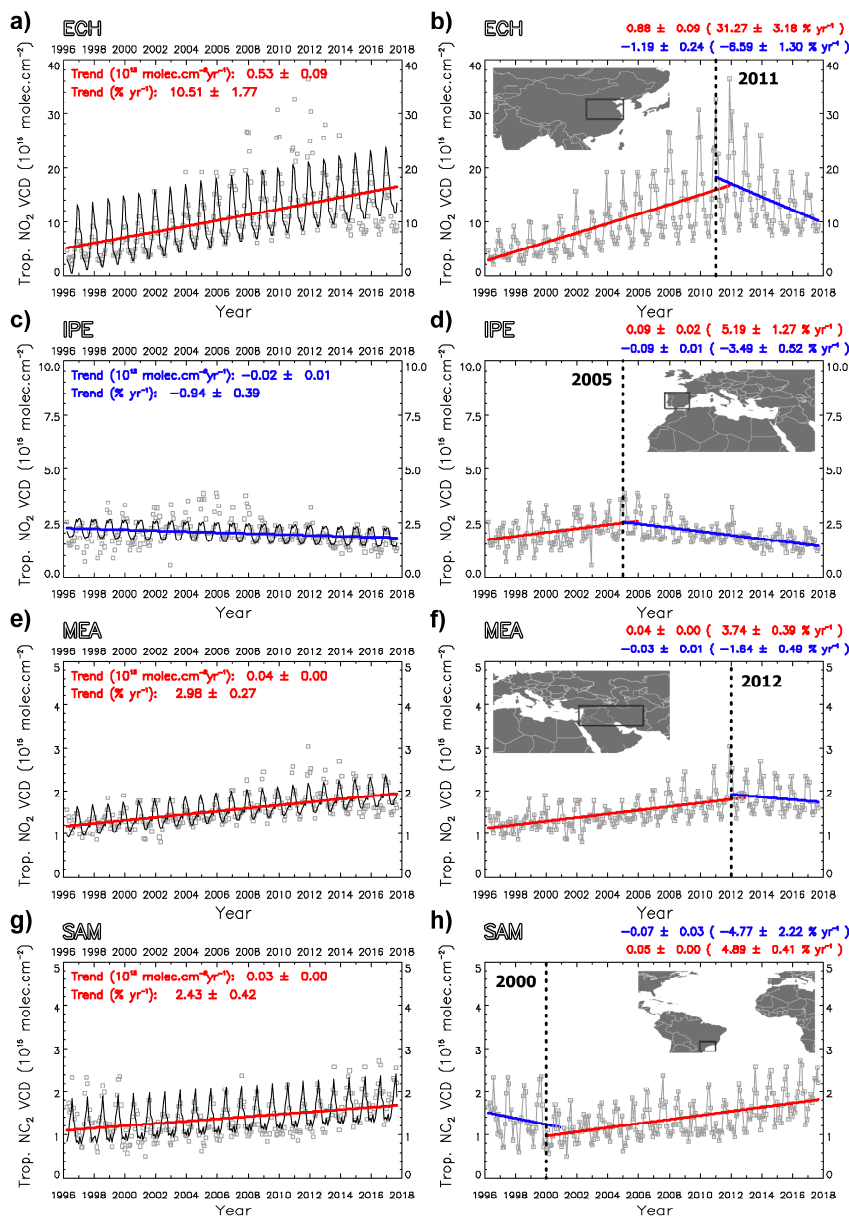

**Figure 4:** (Left column) satellite-based timeseries (grey colored points) of tropospheric NO<sub>2</sub> VCD for the period 4/1996-9/2017 for the eastern China (a), the Iberian Peninsula (c), the Middle East (e) and the south-eastern America (g). The black line depicts the fitted timeseries and the thick line depicts the trend (solid for statistically significant trends and dashed for statistically insignificant trends at the 95% confidence level / red color for positive trends and blue color for negative trends). The absolute trends (in 10<sup>15</sup> molecules cm<sup>-2</sup> yr<sup>-1</sup>) and the trends relative to the fitted mean of the first year (in % yr<sup>-1</sup>) with the corresponding uncertainties ( $\pm 1\sigma$ ) are given on the plots. (Right column) satellite-based timeseries (grey colored points and lines) of tropospheric NO<sub>2</sub> VCD for the same regions. The thick lines, similarly to the left column panels, depict the trend for the sub-period before and the sub-period after the detected trend reversal (the year of reversal is included in both sub-periods). The year of the trend reversal is indicated with a thick dotted black line. The absolute trends and the trends relative to the fitted mean of the first year of the sub-periods (in parentheses) with the corresponding uncertainties are given on the plots (upper and lower lines correspond to the first and the second sub-period, respectively). The regions of interest are also shown on the panels.

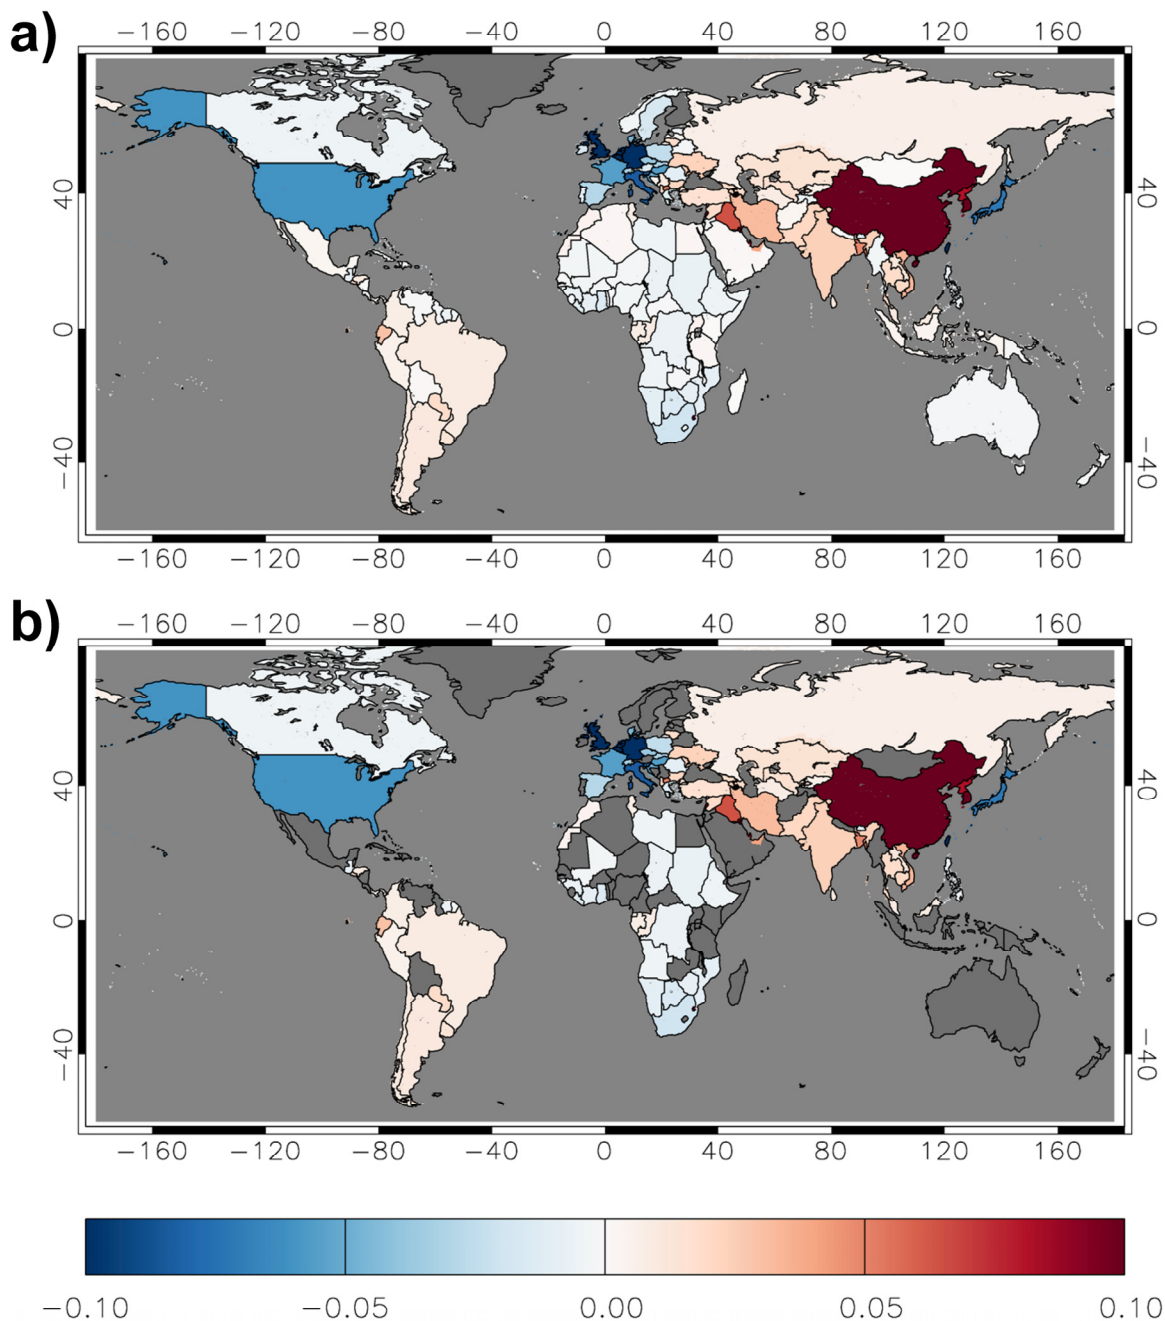

**Figure 5:** (a) Satellite-based trends of tropospheric NO<sub>2</sub> VCD (in  $10^{15}$  molecules  $\text{cm}^{-2} \text{yr}^{-1}$ ) on a country basis for the period 4/1996-9/2017. Only trends calculated for timeseries with at least 8 months per year are taken into consideration. (b) Same as (a) but for statistically significant trends at the 95% confidence level.

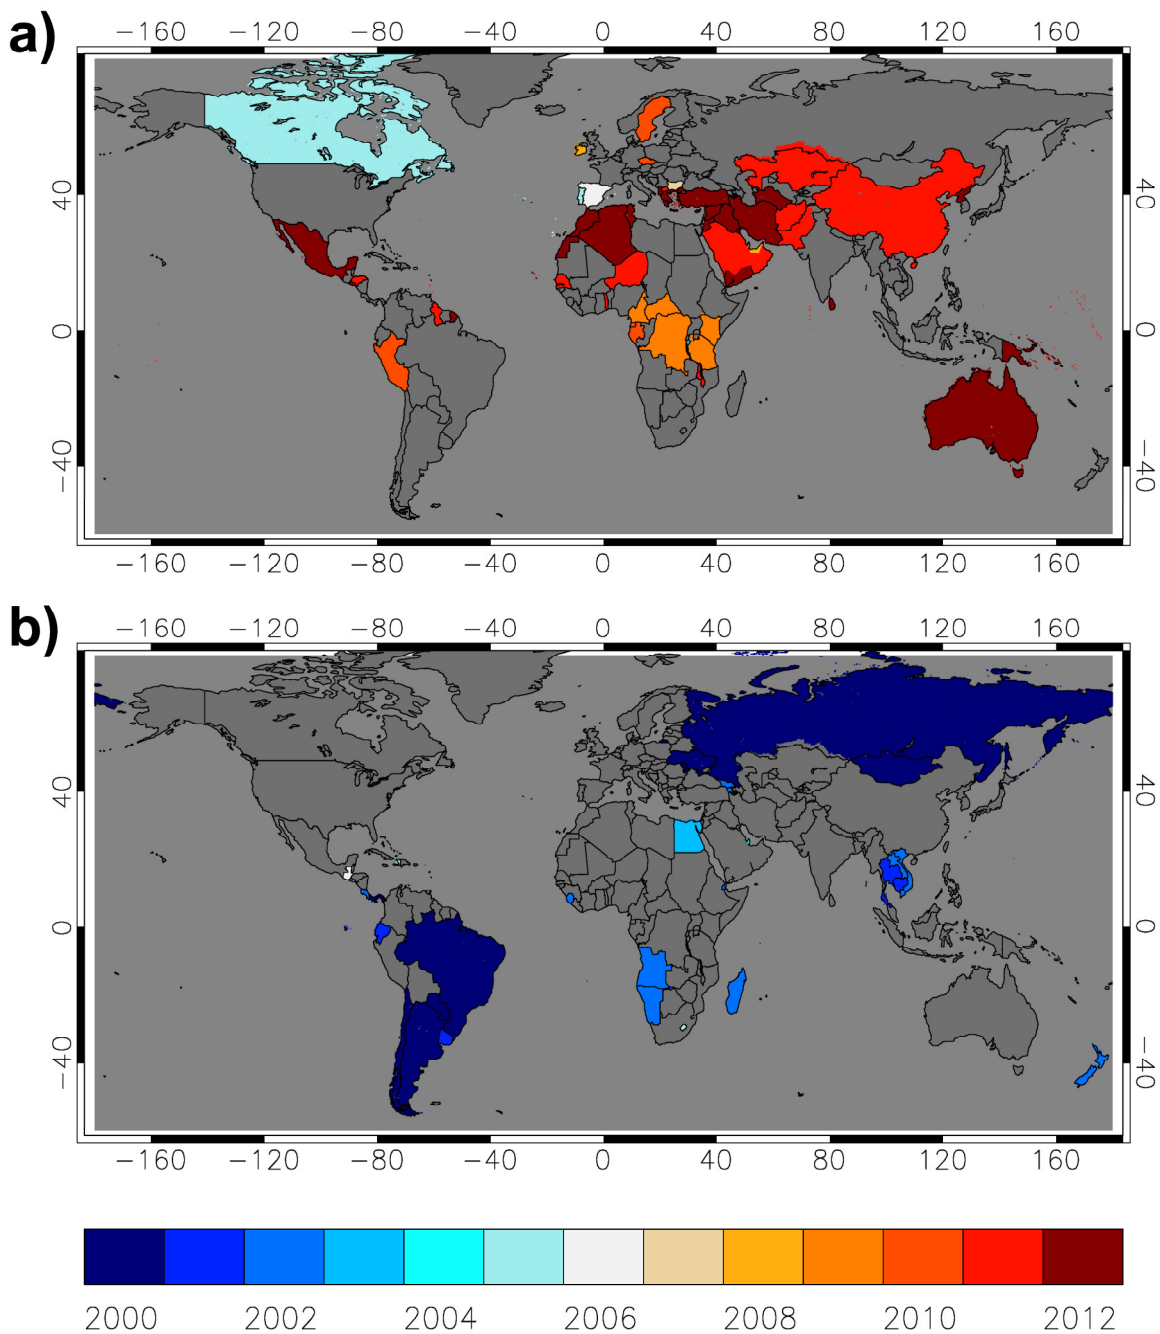

**Figure 6:** Year of tropospheric NO<sub>2</sub> VCD trend reversal from positive to negative (a) and from negative to positive (b) on a country level. Only countries with a statistically significant trend at the 95% confidence level for the period before or after the year of reversal are shown.



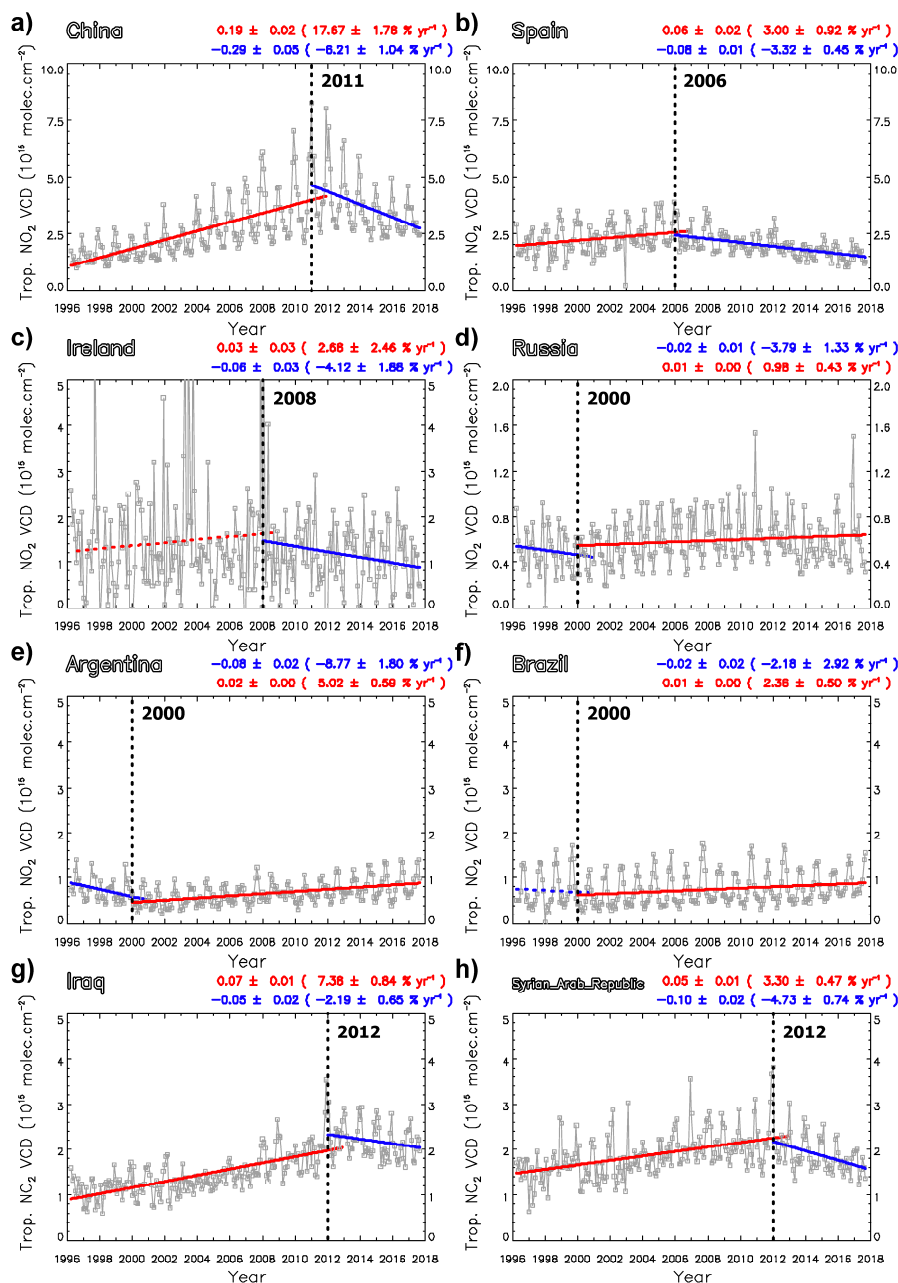

**Figure 7:** Satellite-based timeseries (grey colored points and lines) of tropospheric NO<sub>2</sub> VCD for the period 4/1996-9/2017 for China (a), Spain (b), Ireland (c), Russia (d), Argentina (e), Syria (f), Iraq (g) and Brazil (h). The thick lines depict the trend (solid for statistically significant trends and dashed for statistically insignificant trends at the 95% confidence level / red color for positive trends and blue color for negative trends) for the sub-period before and the sub-period after the detected trend reversal (the year of reversal is included in both sub-periods). The year of trend reversal is indicated with a thick dotted black line. The absolute trends (in 10<sup>15</sup> molecules cm<sup>-2</sup> yr<sup>-1</sup>) and the trends (in % yr<sup>-1</sup>) relative to the fitted mean of the first year of the sub-periods (in parentheses) with the corresponding uncertainties (±1σ) are given on the plots (upper and lower lines correspond to the first and the second sub-period, respectively).

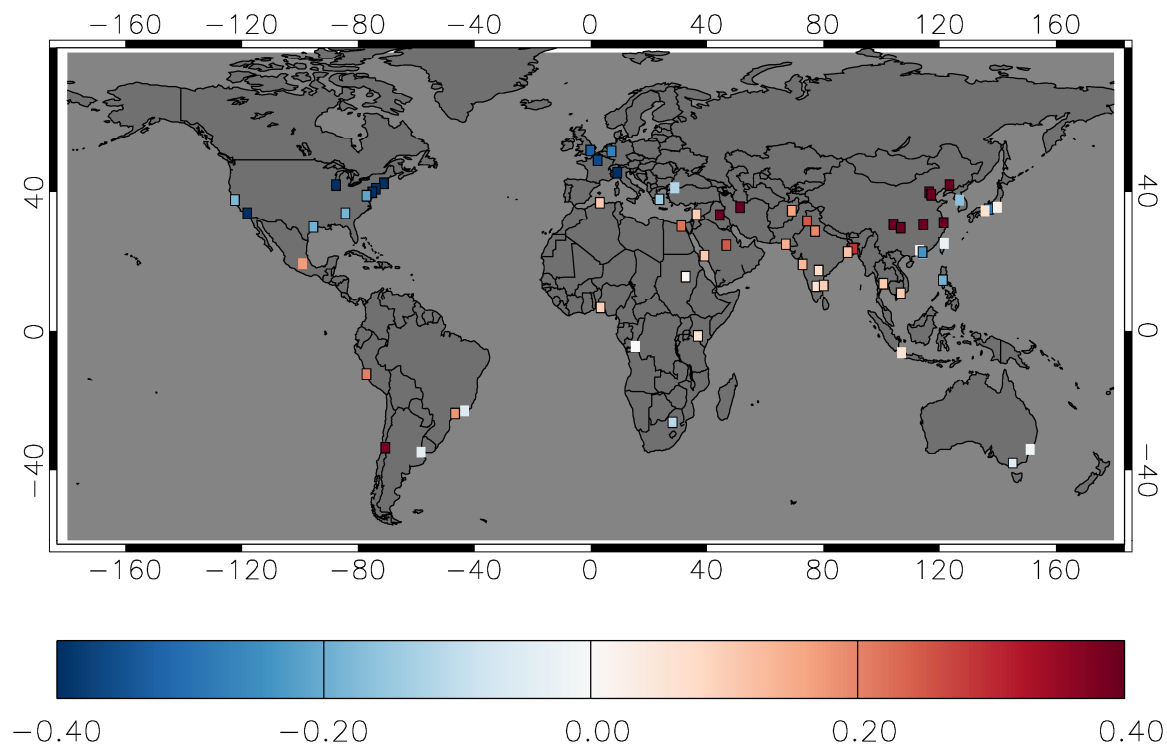

**Figure 8:** Satellite-based trends of tropospheric NO<sub>2</sub> VCD (in  $10^{15}$  molecules  $\text{cm}^{-2} \text{yr}^{-1}$ ) for megacities and large urban agglomerations of the world for the period 4/1996-9/2017. The spots with a statistically significant trend at the 95% confidence level are marked with a black outline.

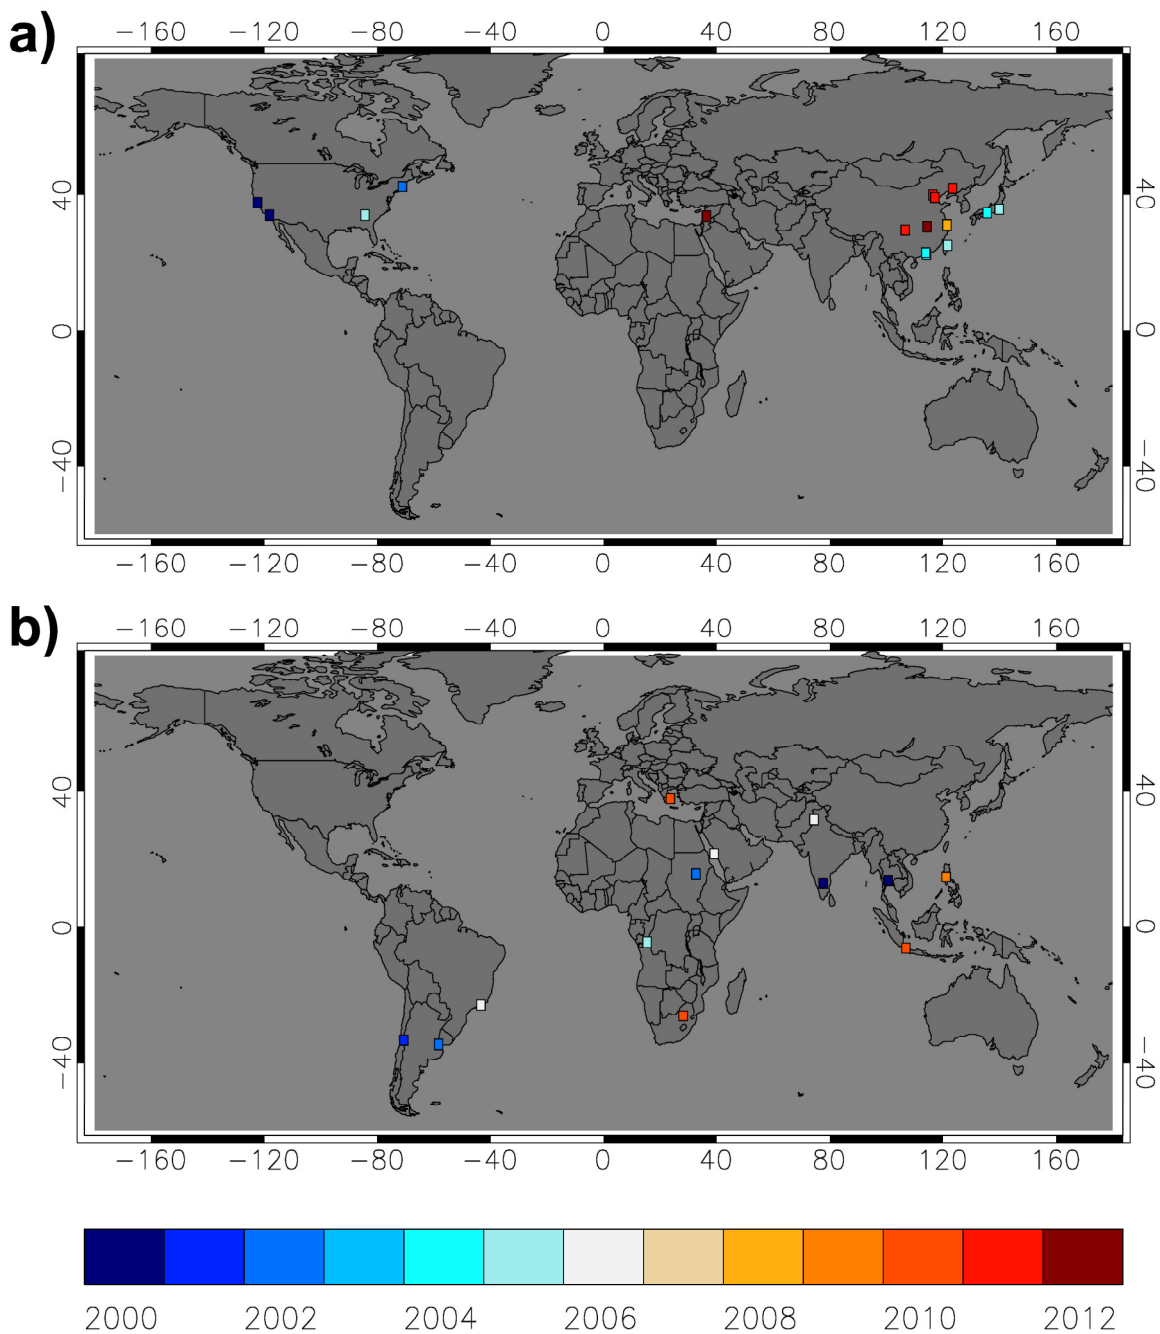

**Figure 9:** Year of tropospheric NO<sub>2</sub> VCD trend reversal from positive to negative (a) and from negative to positive (b) for megacities and large urban agglomerations of the world. Only spots with a statistically significant trend at the 95% confidence level for the period before or after the year of reversal are shown.



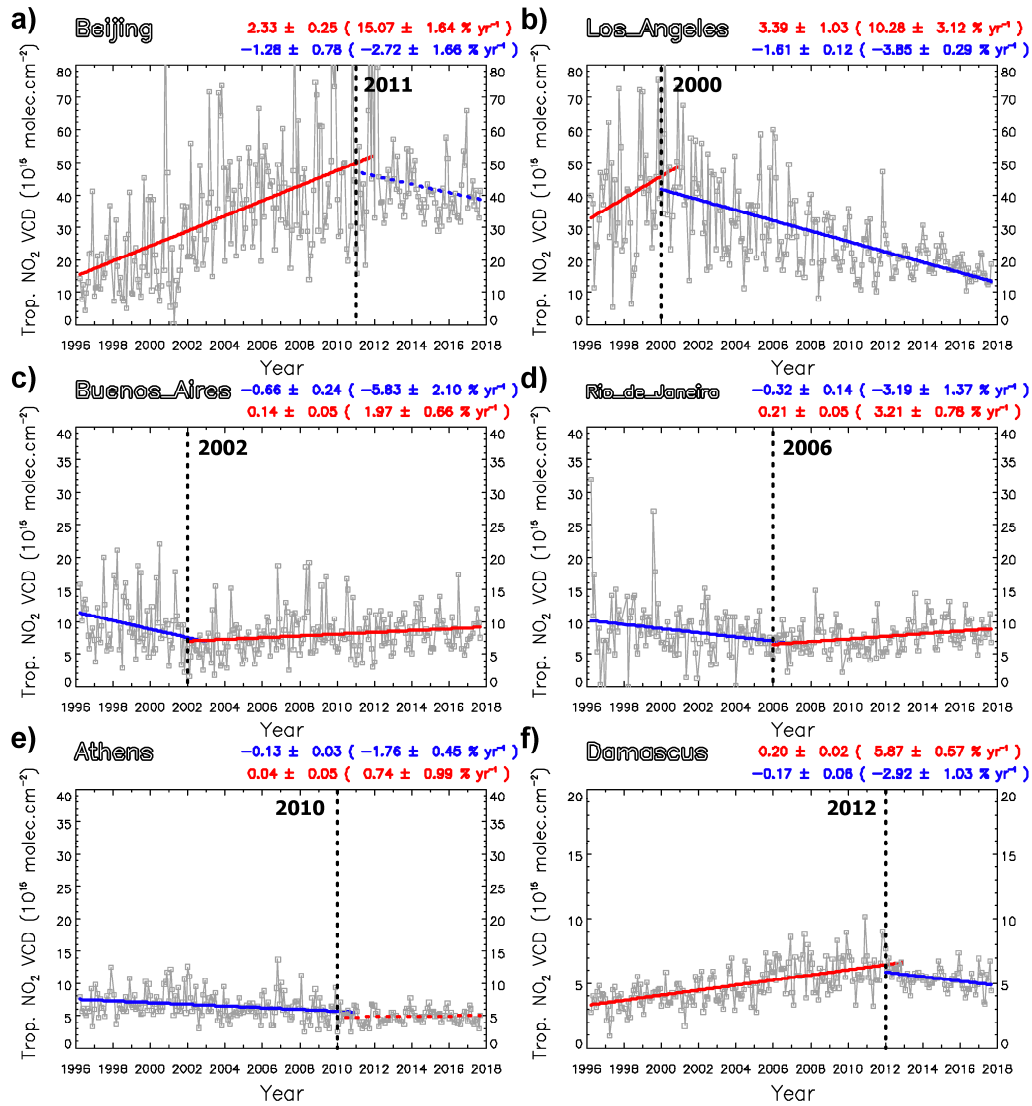

**Figure 10:** The same as Fig. 7 but for (a) Beijing/China, (b) Los Angeles/U.S., (c) Buenos Aires/Argentina, (d) Rio de Janeiro/Brazil, (e) Athens/Greece and (f) Damascus/Syria.
